# Supplementary material for: Synergistic regulation by H3K36 and H3K27 methylation defines the chromatin landscape to control virulence and secondary metabolism in a fungal pathogen
Source: HighWire-hosted journal article supplement (doi:10.1101/gr.280560.125), 2025-10-14
Supplement: Supplemental_Table_S1.xlsx [file Supplemental_Table_S1.xlsx]

## Sheet: Sheet2
Supplemental Table S1. Distribution of SET domain proteins across 1038 fungal species.
Species	Genome accession	Genome size (bp)	Gene number	Taxonomy ID	Kingdom	Phylum	Class	Order	Family	Genus	Cluster1												Cluster2														Cluster3
											Group 03	Group 04	Group 06	Group 07	Group 11	Group 14	Group 15	Group 21	Group 22	Group 24	Group 25	Group 29	Group 01	Group 02	Group 08	Group 09	Group 13	Group 16	Group 17	Group 18	Group 19	Group 20	Group 26	Group 27	Group 28	Group 30	Group 05	Group 10	Group 12	Group 23
Aaosphaeria arxii	GCA_010015735.1	38901049	14201	1450171	Fungi	Ascomycota	Dothideomycetes	Pleosporales	NA	Aaosphaeria	1	1	1	1	1	1	1	0	0	0	0	0	5	2	3	0	3	1	1	1	0	0	0	0	0	0	1	2	2	0
Abortiporus biennis	GCA_022606235.1	33118568	11766	137743	Fungi	Basidiomycota	Agaricomycetes	Polyporales	Podoscyphaceae	Abortiporus	1	1	1	1	1	2	0	1	0	0	0	0	4	2	0	12	0	0	0	1	1	1	0	0	0	0	1	0	1	0
Absidia glauca	GCA_900079185.1	48746359	14891	4829	Fungi	Mucoromycota	Mucoromycetes	Mucorales	Cunninghamellaceae	Absidia	2	2	1	3	2	0	1	2	0	0	0	0	0	4	0	0	0	0	2	1	1	2	0	0	0	1	1	2	1	0
Absidia repens	GCA_002105175.1	47422896	14915	90262	Fungi	Mucoromycota	Mucoromycetes	Mucorales	Cunninghamellaceae	Absidia	1	3	1	3	2	0	1	1	1	0	0	0	0	5	0	0	0	0	0	1	1	3	0	0	0	0	1	1	1	0
Acaromyces ingoldii	GCA_003144295.1	19330111	8026	215250	Fungi	Basidiomycota	Exobasidiomycetes	Exobasidiales	Cryptobasidiaceae	Acaromyces	1	1	1	1	1	0	1	0	1	1	0	0	0	1	0	0	1	0	0	1	1	0	0	0	0	0	1	0	1	0
Acarospora aff.	GCA_022814355.1	28651879	7888	2871812	Fungi	Ascomycota	Lecanoromycetes	Acarosporales	Acarosporaceae	Acarospora	1	1	2	1	0	1	1	0	0	0	0	0	0	1	0	0	1	1	0	0	0	0	0	0	0	0	1	0	1	0
Acaulospora colombiana	GCA_910592055.1	299808427	14505	27376	Fungi	Mucoromycota	Glomeromycetes	Diversisporales	Acaulosporaceae	Acaulospora	3	1	1	0	0	0	1	0	0	0	0	0	0	1	0	1	1	1	1	0	1	1	0	0	0	0	0	1	1	0
Acaulospora morrowiae	GCA_910591835.1	218774155	18394	94023	Fungi	Mucoromycota	Glomeromycetes	Diversisporales	Acaulosporaceae	Acaulospora	3	1	4	0	0	1	1	0	2	1	0	0	0	0	0	0	2	3	0	0	0	1	0	0	0	0	2	2	1	0
Acephala macrosclerotiorum	GCA_014904845.1	73683338	21022	886606	Fungi	Ascomycota	Leotiomycetes	Helotiales	Mollisiaceae	Acephala	1	2	1	2	0	1	1	0	1	0	0	0	15	4	3	0	3	6	0	0	0	0	0	0	0	0	1	0	2	0
Acidomyces richmondensis	GCA_001592465.1	29881346	11177	245562	Fungi	Ascomycota	Dothideomycetes	Mycosphaerellales	Teratosphaeriaceae	Acidomyces	1	1	1	1	1	1	1	0	0	0	0	0	0	0	0	0	1	2	1	1	0	0	0	0	0	0	1	0	0	0
Actinomortierella ambigua	GCA_015502565.1	37568403	9860	1343610	Fungi	Mucoromycota	Mortierellomycetes	Mortierellales	Mortierellaceae	Actinomortierella	1	1	1	2	1	0	1	0	1	0	0	0	0	2	0	0	0	0	2	1	1	1	1	1	0	0	1	1	1	1
Actinomortierella wolfii	GCA_016098105.1	34232935	8361	90253	Fungi	Mucoromycota	Mortierellomycetes	Mortierellales	Mortierellaceae	Actinomortierella	1	1	1	1	1	0	1	1	1	0	0	0	0	2	0	0	0	0	1	1	1	1	0	1	0	0	1	0	1	1
Agrocybe chaxingu	GCA_027627235.1	40343159	12419	84603	Fungi	Basidiomycota	Agaricomycetes	Agaricales	Strophariaceae	Agrocybe	1	1	1	1	1	2	0	0	0	0	0	0	1	0	0	5	0	0	1	1	0	0	0	0	0	0	1	0	0	0
Agrocybe pediades	GCA_013053245.1	45149591	12919	84607	Fungi	Basidiomycota	Agaricomycetes	Agaricales	Strophariaceae	Agrocybe	2	1	1	1	1	2	0	1	1	0	0	0	1	2	0	13	0	0	2	1	1	1	0	0	0	0	1	1	0	1
Agyrium rufum	GCA_022814335.1	28047069	8330	443868	Fungi	Ascomycota	Lecanoromycetes	Pertusariales	Pertusariaceae	Agyrium	1	1	1	1	1	1	1	0	0	0	0	0	0	1	0	0	1	0	0	0	0	0	0	0	0	0	1	0	1	0
Akanthomyces lecanii	GCA_001636795.1	35594087	11030	2714763	Fungi	Ascomycota	Sordariomycetes	Hypocreales	Cordycipitaceae	Akanthomyces	1	1	1	1	1	2	1	0	0	0	0	0	1	1	0	0	4	1	0	0	0	0	0	0	0	0	1	1	2	0
Akanthomyces muscarius	GCA_028009165.1	36207525	12347	2231603	Fungi	Ascomycota	Sordariomycetes	Hypocreales	Cordycipitaceae	Akanthomyces	1	1	1	1	1	1	2	0	0	0	0	0	1	1	0	0	4	1	0	0	0	0	0	0	0	0	1	1	3	0
Alectoria fallacina	GCA_905337325.1	65236659	11130	1903189	Fungi	Ascomycota	Lecanoromycetes	Lecanorales	Parmeliaceae	Alectoria	1	1	1	1	1	0	1	0	0	0	0	0	4	2	0	0	2	1	0	0	0	0	0	0	0	0	0	0	0	0
Allomyces arbusculus	GCA_027604705.1	26482826	8889	64504	Fungi	Blastocladiomycota	Blastocladiomycetes	Blastocladiales	Blastocladiaceae	Allomyces	2	2	2	1	0	0	1	1	1	0	1	0	0	1	0	0	0	0	0	0	0	3	0	0	0	0	1	2	1	0
Allomyces javanicus	GCA_027604645.1	29927322	9981	64505	Fungi	Blastocladiomycota	Blastocladiomycetes	Blastocladiales	Blastocladiaceae	Allomyces	1	2	1	1	0	1	1	2	1	0	1	0	1	0	0	0	0	0	0	0	0	3	0	0	0	0	1	2	1	0
Allomyces macrogynus	GCA_000151295.1	57060573	18774	28583	Fungi	Blastocladiomycota	Blastocladiomycetes	Blastocladiales	Blastocladiaceae	Allomyces	3	4	2	2	0	1	2	3	1	0	2	0	2	1	0	0	0	0	0	0	0	4	0	0	0	0	2	3	1	0
Alternaria tenuissima	GCA_004154735.1	33066186	12799	119927	Fungi	Ascomycota	Dothideomycetes	Pleosporales	Pleosporaceae	Alternaria	1	2	1	1	1	1	1	0	0	0	0	0	4	1	5	0	2	2	1	1	0	0	0	0	0	0	2	1	1	0
Alyxoria varia	GCA_026054675.1	25325852	7578	91480	Fungi	Ascomycota	Arthoniomycetes	Arthoniales	Lecanographaceae	Alyxoria	1	1	1	1	1	1	1	0	1	0	0	0	4	1	0	1	0	2	1	1	0	0	0	0	0	0	1	0	1	0
Amanita inopinata	GCA_001691775.3	20082689	7564	933333	Fungi	Basidiomycota	Agaricomycetes	Agaricales	Amanitaceae	Amanita	2	1	1	1	1	1	0	0	0	0	0	0	1	2	0	2	0	0	1	0	1	1	0	0	0	0	1	0	0	1
Amanita muscaria	GCA_000827485.1	40699759	18091	41956	Fungi	Basidiomycota	Agaricomycetes	Agaricales	Amanitaceae	Amanita	2	1	1	1	1	1	0	0	1	0	0	0	0	2	0	1	0	0	1	0	1	1	0	0	0	0	1	0	0	0
Amanita polypyramis	GCA_001691755.2	19670722	7962	1004511	Fungi	Basidiomycota	Agaricomycetes	Agaricales	Amanitaceae	Amanita	2	1	1	1	1	1	0	0	0	0	0	0	1	2	0	1	0	0	1	0	1	1	0	0	0	0	1	0	0	0
Ambispora gerdemannii	GCA_910591945.1	87965881	13690	144530	Fungi	Mucoromycota	Glomeromycetes	Archaeosporales	Ambisporaceae	Ambispora	2	1	2	2	1	1	0	0	0	1	1	0	0	2	0	0	2	10	0	1	0	1	0	0	0	0	0	1	1	0
Ambispora leptoticha	GCA_910591765.1	197202035	14642	144679	Fungi	Mucoromycota	Glomeromycetes	Archaeosporales	Ambisporaceae	Ambispora	1	0	0	0	1	1	0	0	0	1	1	0	0	2	0	0	5	8	0	1	0	1	0	0	0	0	0	2	1	0
Ambrosiozyma monospora	GCA_030267745.1	28916333	13436	43982	Fungi	Ascomycota	Saccharomycetes	Saccharomycetales	NA	Ambrosiozyma	0	1	1	0	1	0	0	0	0	0	0	0	0	0	0	0	0	0	0	0	0	0	0	0	0	0	1	0	1	0
Amniculicola lignicola	GCA_010015725.1	49576578	15585	455074	Fungi	Ascomycota	Dothideomycetes	Pleosporales	Amniculicolaceae	Amniculicola	1	1	2	2	1	1	2	0	1	1	0	0	9	1	4	0	1	1	1	1	0	0	0	0	1	0	1	1	1	0
Amorphotheca resinae	GCA_003019875.1	28632918	9642	5101	Fungi	Ascomycota	Leotiomycetes	Helotiales	Amorphothecaceae	Amorphotheca	1	1	1	1	1	1	1	0	1	0	0	0	4	2	1	0	0	2	0	1	0	0	0	0	0	0	1	0	1	0
Ampelomyces quisqualis	GCA_010094095.1	36811257	11147	50730	Fungi	Ascomycota	Dothideomycetes	Pleosporales	Leptosphaeriaceae	Ampelomyces	1	1	1	1	1	1	1	1	0	0	0	0	5	1	4	0	1	1	1	1	0	0	0	0	0	0	1	0	1	0
Amylocarpus encephaloides	GCA_019669835.1	46286790	11869	45428	Fungi	Ascomycota	Leotiomycetes	Helotiales	NA	Amylocarpus	1	1	1	2	1	1	1	0	0	0	0	0	8	2	4	0	2	1	0	1	0	0	0	0	0	0	1	1	1	0
Amylocystis lapponica	GCA_022376435.1	35500685	11558	202700	Fungi	Basidiomycota	Agaricomycetes	Polyporales	Dacryobolaceae	Amylocystis	1	1	1	0	1	2	0	0	0	0	0	0	2	2	0	3	3	0	1	1	1	1	0	0	0	0	1	1	0	0
Amylostereum chailletii	GCA_022385825.1	38204724	14729	55340	Fungi	Basidiomycota	Agaricomycetes	Russulales	Stereaceae	Amylostereum	2	1	1	4	1	4	0	0	0	0	0	0	2	2	0	6	0	0	0	0	2	1	0	0	0	0	1	1	0	0
Anaeromyces robustus	GCA_002104895.1	71685009	12823	1754192	Fungi	Chytridiomycota	Neocallimastigomycetes	Neocallimastigales	Neocallimastigaceae	Anaeromyces	1	1	1	1	1	0	1	0	0	0	3	0	0	4	0	0	0	0	0	0	0	3	1	1	0	0	1	3	0	0
Anncaliia algerae	GCA_000385855.2	17534931	5245	723287	Fungi	Microsporidia	NA	NA	Tubulinosematidae	Anncaliia	0	1	0	0	0	1	0	0	0	0	0	0	0	0	0	0	0	0	0	0	0	0	0	0	0	0	0	0	0	0
Annulohypoxylon maeteangense	GCA_022496945.1	38245008	11000	1927788	Fungi	Ascomycota	Sordariomycetes	Xylariales	Hypoxylaceae	Annulohypoxylon	1	1	1	1	1	1	1	0	0	0	0	0	3	1	5	0	1	1	0	0	0	0	0	0	0	0	1	0	1	0
Annulohypoxylon nitens	GCA_022496965.1	38537808	11873	326626	Fungi	Ascomycota	Sordariomycetes	Xylariales	Hypoxylaceae	Annulohypoxylon	1	1	1	1	1	1	1	0	0	0	0	0	3	2	5	0	2	1	0	0	0	0	0	0	0	0	1	1	1	0
Annulohypoxylon truncatum	GCA_022578515.1	38067699	11151	327061	Fungi	Ascomycota	Sordariomycetes	Xylariales	Hypoxylaceae	Annulohypoxylon	1	1	1	1	1	1	1	0	0	0	0	0	3	1	4	0	2	1	0	0	0	0	0	0	0	0	1	0	1	0
Antrodiella citrinella	GCA_004802725.1	33017182	9805	2447956	Fungi	Basidiomycota	Agaricomycetes	Polyporales	Steccherinaceae	Antrodiella	1	2	1	1	0	1	0	0	0	0	0	0	1	0	0	1	3	0	0	1	1	1	0	0	0	0	1	1	0	0
Aphanocladium album	GCA_029218145.1	35117533	11167	12942	Fungi	Ascomycota	Sordariomycetes	Hypocreales	NA	Aphanocladium	1	1	1	1	1	1	1	0	0	0	0	0	4	1	0	0	5	1	0	0	0	0	0	0	0	0	1	1	2	0
Apiotrichum porosum	GCA_003942205.1	25479456	9153	105984	Fungi	Basidiomycota	Tremellomycetes	Trichosporonales	Trichosporonaceae	Apiotrichum	1	1	1	1	1	0	1	0	1	0	0	0	1	1	0	0	0	0	0	1	1	0	0	0	0	0	1	0	0	1
Aplosporella prunicola	GCA_010093885.1	32818685	12545	462254	Fungi	Ascomycota	Dothideomycetes	Botryosphaeriales	Aplosporellaceae	Aplosporella	1	1	1	1	1	1	1	1	0	0	0	0	5	2	0	0	0	1	1	1	0	0	0	0	0	0	1	2	1	0
Apophysomyces ossiformis	GCA_014839865.1	34079843	9528	679940	Fungi	Mucoromycota	Mucoromycetes	Mucorales	Mucoraceae	Apophysomyces	1	2	2	0	1	0	1	1	1	0	0	0	0	4	0	0	0	0	1	1	1	1	0	1	0	1	1	2	1	1
Armillaria gallica	GCA_002307695.1	85336812	25695	47427	Fungi	Basidiomycota	Agaricomycetes	Agaricales	Physalacriaceae	Armillaria	5	1	1	1	0	2	0	0	0	0	0	0	3	2	0	17	0	0	1	1	1	1	0	0	0	0	1	1	0	1
Armillaria solidipes	GCA_002307675.1	58009494	20808	1076256	Fungi	Basidiomycota	Agaricomycetes	Agaricales	Physalacriaceae	Armillaria	2	1	1	1	1	3	0	0	0	0	0	0	2	2	0	17	0	0	1	1	1	1	0	0	0	0	1	1	1	0
Arthrobotrys entomopaga	GCA_012184315.1	38379124	10344	321852	Fungi	Ascomycota	Orbiliomycetes	Orbiliales	Orbiliaceae	Arthrobotrys	1	1	1	1	1	1	1	0	0	0	0	0	2	0	0	0	3	0	0	0	0	0	0	0	0	0	1	1	1	0
Arthrobotrys flagrans	GCA_004000055.1	36645795	9897	97331	Fungi	Ascomycota	Orbiliomycetes	Orbiliales	Orbiliaceae	Arthrobotrys	1	1	1	1	1	1	1	1	1	0	0	0	2	1	0	0	3	1	0	0	0	0	0	0	0	0	1	1	1	0
Arthroderma uncinatum	GCA_011692745.1	23563256	7016	74035	Fungi	Ascomycota	Eurotiomycetes	Onygenales	Arthrodermataceae	Arthroderma	1	1	1	1	1	0	1	1	0	0	0	0	1	0	0	0	2	1	0	0	0	0	0	0	0	0	1	1	0	0
Arthromyces matolae	GCA_018855395.1	50532040	16549	530044	Fungi	Basidiomycota	Agaricomycetes	Agaricales	Tricholomataceae	Arthromyces	2	0	1	1	0	0	0	0	0	0	0	0	0	2	0	15	0	0	0	1	1	1	0	0	0	0	1	1	0	0
Artomyces pyxidatus	GCA_022160305.1	37987417	15125	48021	Fungi	Basidiomycota	Agaricomycetes	Russulales	Auriscalpiaceae	Artomyces	2	1	1	3	1	2	0	1	0	0	0	0	2	2	0	9	0	0	0	1	1	1	0	0	0	0	1	1	0	0
Ascobolus immersus	GCA_003788565.2	59529874	17820	5191	Fungi	Ascomycota	Pezizomycetes	Pezizales	Ascobolaceae	Ascobolus	1	1	1	1	1	1	0	1	0	0	0	0	8	1	0	0	0	0	0	0	0	0	0	0	0	0	1	0	1	0
Ascochyta lentis	GCA_004011705.1	41975033	11638	205686	Fungi	Ascomycota	Dothideomycetes	Pleosporales	Didymellaceae	Ascochyta	1	1	1	1	1	0	1	0	0	0	0	0	3	1	2	0	0	1	1	1	0	0	0	0	0	0	2	1	1	0
Ascochyta rabiei	GCA_001630375.1	34658250	10596	5454	Fungi	Ascomycota	Dothideomycetes	Pleosporales	Didymellaceae	Ascochyta	1	1	2	1	1	0	1	0	0	0	0	0	3	1	2	0	1	2	1	1	0	0	0	0	0	0	2	1	1	0
Ascodesmis nigricans	GCA_004786065.1	27385218	9619	341454	Fungi	Ascomycota	Pezizomycetes	Pezizales	Ascodesmidaceae	Ascodesmis	1	1	1	1	1	1	1	0	1	0	0	0	2	1	0	0	0	0	0	1	0	0	0	0	0	0	1	1	1	0
Ascoidea rubescens	GCA_001661345.1	17503998	6785	54195	Fungi	Ascomycota	Saccharomycetes	Saccharomycetales	Ascoideaceae	Ascoidea	0	1	1	0	1	0	1	0	0	0	0	0	0	1	0	0	0	0	0	0	1	0	0	0	0	0	1	0	0	0
Ascosphaera acerosa	GCA_024244165.1	18611625	6563	51565	Fungi	Ascomycota	Eurotiomycetes	Onygenales	Ascosphaeraceae	Ascosphaera	1	1	1	1	1	0	1	0	0	0	0	0	0	0	0	0	0	0	0	0	0	0	0	0	0	0	0	0	1	0
Ascosphaera aggregata	GCA_024244195.1	19806242	6800	51564	Fungi	Ascomycota	Eurotiomycetes	Onygenales	Ascosphaeraceae	Ascosphaera	1	1	1	1	1	0	0	0	0	0	0	0	0	0	0	0	0	1	0	0	0	0	0	0	0	0	1	0	1	0
Ascosphaera apis	GCA_001636715.1	20313079	6442	5105	Fungi	Ascomycota	Eurotiomycetes	Onygenales	Ascosphaeraceae	Ascosphaera	0	1	0	1	1	0	1	0	0	0	0	0	0	0	1	0	0	1	0	0	0	0	0	0	0	0	1	0	1	0
Ashbya aceris	GCA_000412225.2	8894523	4487	566037	Fungi	Ascomycota	Saccharomycetes	Saccharomycetales	Saccharomycetaceae	Eremothecium	0	1	1	0	1	0	0	0	0	0	0	0	0	0	0	0	0	0	1	0	1	0	0	0	0	0	1	2	0	1
Aspergillus clavatus	GCA_000002715.1	27859441	9121	5057	Fungi	Ascomycota	Eurotiomycetes	Eurotiales	Aspergillaceae	Aspergillus	1	1	1	1	1	0	1	0	0	0	0	0	1	1	0	0	1	2	0	0	0	0	0	0	0	0	1	2	2	0
Aspergillus fumigatus	GCA_000002655.1	29384958	9630	746128	Fungi	Ascomycota	Eurotiomycetes	Eurotiales	Aspergillaceae	Aspergillus	1	1	1	1	1	0	1	0	0	0	0	0	1	1	0	0	1	2	0	0	0	0	0	0	0	0	1	2	1	0
Aspergillus niger	GCA_000002855.2	33975768	14086	5061	Fungi	Ascomycota	Eurotiomycetes	Eurotiales	Aspergillaceae	Aspergillus	1	1	1	1	1	0	1	1	0	0	0	0	0	1	0	0	2	0	2	0	0	0	0	0	0	0	1	0	2	0
Asterophora parasitica	GCA_018282005.1	34053942	9451	117018	Fungi	Basidiomycota	Agaricomycetes	Agaricales	Lyophyllaceae	Asterophora	0	0	1	1	0	1	0	0	0	0	0	0	1	1	0	6	0	0	1	1	1	1	0	0	0	0	1	0	0	0
Astraeus odoratus	GCA_016618355.2	45099382	13403	265491	Fungi	Basidiomycota	Agaricomycetes	Boletales	Astraeaceae	Astraeus	1	1	1	1	0	0	0	0	0	0	0	0	0	0	0	0	0	0	1	1	1	1	0	0	0	0	1	0	0	0
Astrocystis sublimbata	GCA_022453515.1	42778081	12484	743114	Fungi	Ascomycota	Sordariomycetes	Xylariales	Xylariaceae	Astrocystis	1	1	1	0	1	1	1	0	0	0	0	0	2	2	4	0	0	1	0	0	0	0	0	0	0	0	1	0	1	0
Atractiella rhizophila	GCA_021432655.1	51470471	17590	1938712	Fungi	Basidiomycota	Atractiellomycetes	Atractiellales	Hoehnelomycetaceae	Atractiella	1	1	1	2	0	2	1	1	1	2	0	0	1	1	1	1	1	0	1	1	0	0	0	0	0	0	1	0	0	0
Aulographum hederae	GCA_010015705.1	31983478	12106	1176130	Fungi	Ascomycota	Dothideomycetes	Aulographales	Aulographaceae	Aulographum	1	1	1	1	1	1	1	0	0	0	0	0	8	2	3	0	1	2	1	1	0	0	0	0	1	0	1	0	1	0
Aureobasidium melanogenum	GCA_000721775.1	26203324	10584	46634	Fungi	Ascomycota	Dothideomycetes	Dothideales	Saccotheciaceae	Aureobasidium	1	1	1	1	1	1	3	0	0	0	0	0	2	1	0	0	3	2	1	1	0	0	0	0	0	0	1	0	1	0
Aureobasidium namibiae	GCA_000721765.1	25428601	10259	559561	Fungi	Ascomycota	Dothideomycetes	Dothideales	Saccotheciaceae	Aureobasidium	1	1	1	1	1	1	1	0	0	0	0	0	2	1	0	0	4	2	1	1	0	0	0	0	0	0	1	1	1	0
Aureobasidium subglaciale	GCA_000721755.1	25796716	10792	1042127	Fungi	Ascomycota	Dothideomycetes	Dothideales	Saccotheciaceae	Aureobasidium	1	1	1	1	1	1	1	0	0	0	0	0	2	1	0	0	5	1	1	1	0	0	0	0	0	0	1	1	1	0
Auricularia subglabra	GCA_000265015.1	74920202	23555	1331295	Fungi	Basidiomycota	Agaricomycetes	Auriculariales	Auriculariaceae	Auricularia	4	1	1	1	2	5	0	0	0	0	0	0	1	3	0	8	1	0	1	1	0	1	0	0	0	0	1	0	0	1
Auriculariopsis ampla	GCA_007026445.1	49873921	15576	97359	Fungi	Basidiomycota	Agaricomycetes	Agaricales	Schizophyllaceae	Auriculariopsis	4	1	2	1	0	2	0	0	0	0	0	0	2	2	0	11	0	0	1	1	1	1	0	0	0	0	1	1	1	0
Auriscalpium vulgare	GCA_022160275.1	39647923	16942	40419	Fungi	Basidiomycota	Agaricomycetes	Russulales	Auriscalpiaceae	Auriscalpium	2	1	1	5	1	2	0	1	1	0	0	0	1	2	0	19	0	0	0	1	1	1	0	0	0	0	0	1	0	0
Austropuccinia psidii	GCA_000469055.2	648992365	133973	181123	Fungi	Basidiomycota	Pucciniomycetes	Pucciniales	Sphaerophragmiaceae	Austropuccinia	1	1	1	1	1	0	1	1	0	1	0	0	1	1	1	1	0	0	0	0	1	0	0	0	0	0	1	0	0	0
Babjeviella inositovora	GCA_001661335.1	15221050	6398	45609	Fungi	Ascomycota	Saccharomycetes	Saccharomycetales	NA	Babjeviella	0	1	1	0	1	0	1	0	0	0	0	0	0	1	0	0	0	0	0	0	1	0	0	0	0	0	1	0	1	0
Bacidia gigantensis	GCA_019456465.1	33117897	9229	2732470	Fungi	Ascomycota	Lecanoromycetes	Lecanorales	Ramalinaceae	Bacidia	1	1	1	1	1	0	1	0	0	0	0	0	2	2	0	0	1	0	0	0	0	0	0	0	0	0	1	1	0	0
Backusella circina	GCA_025399235.1	48648288	16992	64653	Fungi	Mucoromycota	Mucoromycetes	Mucorales	Backusellaceae	Backusella	0	2	5	2	3	0	1	2	1	0	0	0	0	5	0	0	0	0	1	1	1	0	0	0	0	1	1	2	1	2
Basidiobolus meristosporus	GCA_002104905.1	89489060	16110	423460	Fungi	Zoopagomycota	Basidiobolomycetes	Basidiobolales	Basidiobolaceae	Basidiobolus	2	1	1	2	0	0	0	2	1	0	3	0	0	1	0	0	0	0	0	0	0	1	0	1	0	0	1	2	0	0
Batrachochytrium dendrobatidis	GCA_000149865.1	23897668	8630	109871	Fungi	Chytridiomycota	Chytridiomycetes	Rhizophydiales	NA	Batrachochytrium	1	1	1	1	0	0	1	0	0	0	0	0	0	2	0	0	0	0	1	0	0	0	1	0	0	0	0	3	1	0
Batrachochytrium salamandrivorans	GCA_002006685.2	73346731	10867	1357716	Fungi	Chytridiomycota	Chytridiomycetes	Rhizophydiales	NA	Batrachochytrium	1	2	2	1	0	0	1	0	0	0	0	0	0	3	0	0	0	0	1	0	0	0	0	0	0	0	0	3	1	0
Baudoinia panamericana	GCA_000338955.1	21875620	10508	1709381	Fungi	Ascomycota	Dothideomycetes	Mycosphaerellales	Teratosphaeriaceae	Baudoinia	1	1	1	1	1	1	1	0	0	0	0	0	2	0	0	0	1	2	1	0	0	0	0	0	0	0	0	0	1	0
Beauveria bassiana	GCA_000280675.1	33697794	10364	176275	Fungi	Ascomycota	Sordariomycetes	Hypocreales	Cordycipitaceae	Beauveria	1	1	1	1	1	1	1	0	0	0	0	0	2	1	0	0	2	1	0	0	0	0	0	0	0	0	1	4	3	0
Beauveria brongniartii	GCA_001636735.1	32515992	9595	118266	Fungi	Ascomycota	Sordariomycetes	Hypocreales	Cordycipitaceae	Beauveria	1	1	1	1	1	1	1	0	0	0	0	0	3	1	0	0	3	1	0	0	0	0	0	0	0	0	1	2	2	0
Benjaminiella poitrasii	GCA_025766325.1	32504669	11659	64631	Fungi	Mucoromycota	Mucoromycetes	Mucorales	Mucoraceae	Benjaminiella	1	2	2	2	2	0	1	1	1	0	0	0	0	3	0	0	0	0	1	1	1	1	0	0	0	1	1	2	1	1
Bifiguratus adelaidae	GCA_002261195.1	19478880	5719	1938954	Fungi	Mucoromycota	Endogonomycetes	Endogonales	NA	Bifiguratus	1	1	1	1	1	0	0	0	1	0	0	0	0	3	0	0	0	0	0	0	0	1	0	0	0	0	1	1	1	0
Bimuria novae-zelandiae	GCA_010015655.1	78183505	16675	147497	Fungi	Ascomycota	Dothideomycetes	Pleosporales	Didymosphaeriaceae	Bimuria	1	2	1	1	1	1	1	0	1	0	0	0	9	1	3	0	2	0	1	1	0	0	0	0	1	0	1	1	1	0
Bipolaris sorokiniana	GCA_000338995.1	34409167	12214	45130	Fungi	Ascomycota	Dothideomycetes	Pleosporales	Pleosporaceae	Bipolaris	1	1	1	1	1	1	1	0	0	0	0	0	2	1	4	0	3	1	1	1	0	0	0	0	0	0	2	0	1	0
Biscogniauxia marginata	GCA_022695795.1	45592449	11381	110534	Fungi	Ascomycota	Sordariomycetes	Xylariales	Xylariaceae	Biscogniauxia	1	1	1	1	1	1	1	0	0	0	0	0	5	2	5	0	0	1	0	0	0	0	0	0	0	0	1	0	1	0
Biscogniauxia mediterranea	GCA_022478735.1	44039921	11018	97377	Fungi	Ascomycota	Sordariomycetes	Xylariales	Xylariaceae	Biscogniauxia	1	1	1	1	0	1	1	0	0	0	0	0	3	2	3	0	1	1	0	0	0	0	0	0	0	0	1	1	1	0
Blakeslea trispora	GCA_025331445.1	37513922	11682	4850	Fungi	Mucoromycota	Mucoromycetes	Mucorales	Choanephoraceae	Blakeslea	1	2	3	2	2	0	1	1	1	0	0	0	0	5	0	0	0	0	1	1	1	1	0	0	0	1	0	2	1	0
Blastocladiella britannica	GCA_025349905.2	19075314	9427	64508	Fungi	Blastocladiomycota	Blastocladiomycetes	Blastocladiales	Blastocladiaceae	Blastocladiella	2	1	2	2	0	1	0	2	0	0	1	0	0	1	0	0	0	0	0	0	0	2	0	0	0	0	2	2	1	0
Blastocladiella emersonii	GCA_025594325.1	32654225	10031	4808	Fungi	Blastocladiomycota	Blastocladiomycetes	Blastocladiales	Blastocladiaceae	Blastocladiella	1	2	1	2	0	1	0	1	2	0	1	0	1	1	0	0	0	0	0	0	0	2	0	0	0	0	1	3	1	0
Blastomyces dermatitidis	GCA_000003525.2	66608683	9755	5039	Fungi	Ascomycota	Eurotiomycetes	Onygenales	Ajellomycetaceae	Blastomyces	1	1	1	1	1	0	1	1	0	0	0	0	2	1	0	0	0	1	0	0	0	0	0	0	0	0	1	0	1	0
Blastomyces gilchristii	GCA_000003855.2	75404732	9692	1681229	Fungi	Ascomycota	Eurotiomycetes	Onygenales	Ajellomycetaceae	Blastomyces	1	1	1	1	1	0	1	1	0	0	0	0	2	1	0	0	0	1	0	0	0	0	0	0	0	0	1	0	1	0
Blastosporella zonata	GCA_018856295.1	48807216	12126	530045	Fungi	Basidiomycota	Agaricomycetes	Agaricales	Tricholomataceae	Blastosporella	0	1	1	0	0	1	0	0	0	0	0	0	0	2	0	2	0	0	1	1	1	1	0	0	0	0	1	0	0	0
Blumeria graminis	GCA_000418435.1	158944908	6525	34373	Fungi	Ascomycota	Leotiomycetes	Erysiphales	Erysiphaceae	Blumeria	1	1	1	1	0	0	1	0	0	0	0	0	2	0	1	0	0	1	0	0	0	0	0	0	0	0	1	0	1	0
Blumeria hordei	GCA_000151065.3	118726170	6495	2867405	Fungi	Ascomycota	Leotiomycetes	Erysiphales	Erysiphaceae	Blumeria	1	1	1	1	0	0	1	0	0	0	0	0	1	1	0	0	0	1	0	0	0	0	0	0	0	0	1	0	1	0
Blyttiomyces helicus	GCA_003614705.1	46468912	12167	388810	Fungi	Chytridiomycota	Chytridiomycetes	NA	NA	Blyttiomyces	1	0	0	2	0	0	1	1	0	0	0	0	0	2	0	0	0	0	2	0	0	0	1	0	0	0	0	1	0	0
Boeremia exigua	GCA_020726555.1	35322113	12871	749465	Fungi	Ascomycota	Dothideomycetes	Pleosporales	Didymellaceae	Boeremia	1	1	2	1	1	0	1	0	1	0	0	0	6	2	2	0	1	1	1	1	0	0	0	0	0	0	2	1	1	0
Boletus edulis	GCA_014925795.1	69185680	18122	36056	Fungi	Basidiomycota	Agaricomycetes	Boletales	Boletaceae	Boletus	2	1	1	1	0	3	0	0	0	0	0	0	0	2	0	0	0	0	1	1	1	1	0	0	0	0	1	0	0	0
Boletus reticuloceps	GCA_018397855.1	55833107	13195	495285	Fungi	Basidiomycota	Agaricomycetes	Boletales	Boletaceae	Boletus	2	1	2	1	0	0	0	0	0	0	0	0	0	2	0	0	0	0	1	1	1	1	0	0	0	0	2	0	0	0
Bondarzewia mesenterica	GCA_004802705.1	36721587	10523	1095465	Fungi	Basidiomycota	Agaricomycetes	Russulales	Bondarzewiaceae	Bondarzewia	2	1	1	0	1	2	0	1	0	0	0	0	1	2	0	1	0	0	0	0	1	1	0	0	0	0	1	0	0	0
Boothiomyces macroporosus	GCA_027604185.1	15700521	7605	261099	Fungi	Chytridiomycota	Chytridiomycetes	Rhizophydiales	Terramycetaceae	Boothiomyces	0	2	0	1	0	0	1	2	0	0	3	0	0	3	0	0	0	0	1	0	0	1	0	0	0	0	0	3	0	1
Borealophlyctis nickersoniae	GCA_027604605.1	38361113	11278	2735257	Fungi	Chytridiomycota	Chytridiomycetes	Rhizophlyctidales	Borealophlyctidaceae	Borealophlyctis	1	1	1	1	0	1	1	1	0	0	0	0	1	4	0	0	0	1	0	0	1	1	0	0	0	0	0	2	0	1
Botryobasidium botryosum	GCA_000697705.1	46674321	16502	264124	Fungi	Basidiomycota	Agaricomycetes	Cantharellales	Botryobasidiaceae	Botryobasidium	2	1	1	1	1	1	0	0	0	0	0	0	4	1	0	3	19	0	0	1	1	1	0	0	0	0	1	1	0	0
Botryosphaeria dothidea	GCA_011503125.2	51758482	14017	55169	Fungi	Ascomycota	Dothideomycetes	Botryosphaeriales	Botryosphaeriaceae	Botryosphaeria	1	1	1	1	1	1	1	0	0	0	0	0	3	1	1	0	0	2	1	1	0	0	0	0	0	0	1	1	1	0
Botryotinia calthae	GCA_004379285.1	47446406	12263	38488	Fungi	Ascomycota	Leotiomycetes	Helotiales	Sclerotiniaceae	Botryotinia	1	1	1	1	1	1	1	0	0	0	0	1	7	1	0	0	1	3	0	1	0	0	0	0	0	0	1	1	1	0
Botryotinia convoluta	GCA_004786275.1	45284057	12417	54673	Fungi	Ascomycota	Leotiomycetes	Helotiales	Sclerotiniaceae	Botryotinia	1	1	1	1	1	1	1	0	0	0	0	0	10	1	1	0	1	3	0	1	0	0	0	0	0	0	1	1	2	0
Botryotinia narcissicola	GCA_004786225.1	54765806	12236	278944	Fungi	Ascomycota	Leotiomycetes	Helotiales	Sclerotiniaceae	Botryotinia	1	1	1	1	1	1	1	0	0	0	0	0	5	1	0	0	1	3	0	1	0	0	0	0	0	0	1	1	1	0
Botrytis cinerea	GCA_000143535.4	42630066	11703	40559	Fungi	Ascomycota	Leotiomycetes	Helotiales	Sclerotiniaceae	Botrytis	1	1	1	1	1	1	1	0	0	0	0	0	6	1	1	0	1	2	0	1	0	0	0	0	0	0	1	1	1	0
Brettanomyces bruxellensis	GCA_000259595.1	12676548	4861	5007	Fungi	Ascomycota	Saccharomycetes	Saccharomycetales	Pichiaceae	Brettanomyces	0	1	1	0	1	0	0	0	0	0	0	0	0	0	0	0	0	0	0	0	0	0	0	0	0	0	1	1	0	0
Brettanomyces nanus	GCA_011074865.2	10186858	4711	13502	Fungi	Ascomycota	Saccharomycetes	Saccharomycetales	Pichiaceae	Brettanomyces	0	1	1	0	1	0	0	0	0	0	0	0	0	0	0	0	0	0	0	0	0	0	0	0	0	0	1	1	1	0
Butyriboletus roseoflavus	GCA_019364595.1	33976981	9014	1325616	Fungi	Basidiomycota	Agaricomycetes	Boletales	Boletaceae	Butyriboletus	1	1	1	1	0	1	0	0	0	0	0	0	0	2	0	0	0	0	0	1	1	1	0	0	0	0	1	0	0	0
Byssothecium circinans	GCA_010015675.1	49288729	15784	147558	Fungi	Ascomycota	Dothideomycetes	Pleosporales	Massarinaceae	Byssothecium	1	1	1	1	1	1	1	0	1	0	0	0	9	1	4	0	3	1	1	1	0	0	0	0	0	0	1	2	1	0
Cadophora gregata	GCA_030347475.1	47765811	14721	51156	Fungi	Ascomycota	Leotiomycetes	Helotiales	NA	Cadophora	1	1	1	1	1	0	1	0	1	0	0	0	9	4	3	0	3	4	1	1	0	0	0	0	0	0	1	2	1	0
Cadophora malorum	GCA_017365405.1	48945047	16400	108018	Fungi	Ascomycota	Leotiomycetes	Helotiales	NA	Cadophora	1	1	1	1	1	1	1	0	0	0	0	0	10	4	1	0	3	4	0	1	0	0	0	0	1	0	1	1	1	0
Calocera cornea	GCA_001632435.1	33244933	13152	29889	Fungi	Basidiomycota	Dacrymycetes	Dacrymycetales	Dacrymycetaceae	Calocera	3	1	2	1	0	1	0	0	0	0	0	0	1	2	0	5	0	0	1	1	1	1	0	0	0	0	1	1	0	1
Calocera viscosa	GCA_001630345.1	29097227	12357	63146	Fungi	Basidiomycota	Dacrymycetes	Dacrymycetales	Dacrymycetaceae	Calocera	1	1	1	1	1	1	0	0	0	0	0	0	1	2	0	5	0	0	1	1	1	1	0	0	0	0	1	0	0	1
Caloplaca aegaea	GCA_023646655.1	31480884	7577	520571	Fungi	Ascomycota	Lecanoromycetes	Teloschistales	Teloschistaceae	Caloplaca	1	1	1	1	1	0	1	0	0	0	0	0	2	1	0	0	0	0	0	0	0	0	0	0	0	0	0	2	0	0
Caloplaca aetnensis	GCA_023646255.1	31894861	9088	520572	Fungi	Ascomycota	Lecanoromycetes	Teloschistales	Teloschistaceae	Caloplaca	1	1	1	1	1	0	1	0	0	0	0	0	1	1	0	0	0	1	0	0	0	0	0	0	0	0	0	1	1	0
Caloplaca ligustica	GCA_023645885.1	24202225	7823	2905937	Fungi	Ascomycota	Lecanoromycetes	Teloschistales	Teloschistaceae	Caloplaca	1	1	2	1	1	0	1	0	0	0	0	0	1	1	0	0	0	0	0	0	0	0	0	0	0	0	0	0	1	0
Calycina marina	GCA_019669825.1	34209217	9557	1763456	Fungi	Ascomycota	Leotiomycetes	Helotiales	Pezizellaceae	Calycina	1	1	1	1	1	1	1	0	1	0	0	0	3	3	2	0	0	0	0	1	0	0	0	0	0	0	1	1	1	0
Camillea tinctor	GCA_022578605.1	45006662	11860	110548	Fungi	Ascomycota	Sordariomycetes	Xylariales	Xylariaceae	Camillea	1	1	1	1	1	1	1	0	0	0	0	0	1	2	4	0	1	1	0	0	0	0	0	0	0	0	1	1	1	0
Candelaria pacifica	GCA_026023815.1	28982752	8063	460848	Fungi	Ascomycota	Candelariomycetes	Candelariales	Candelariaceae	Candelaria	1	1	1	1	1	1	1	0	1	0	0	0	2	1	0	0	0	1	0	0	0	0	0	0	0	0	1	0	1	0
Candelina mexicana	GCA_026023805.1	33725466	8168	460853	Fungi	Ascomycota	Candelariomycetes	Candelariales	Candelariaceae	Candelina	1	1	1	1	1	1	1	1	1	0	0	0	1	1	0	0	0	1	0	0	0	0	0	0	0	0	1	0	1	0
Candelina submexicana	GCA_026023795.1	23786893	8190	460854	Fungi	Ascomycota	Candelariomycetes	Candelariales	Candelariaceae	Candelina	1	1	1	1	1	1	1	1	1	0	0	0	1	1	0	0	0	1	0	0	0	0	0	0	0	0	1	0	1	0
Candida albicans	GCA_000149445.2	14472953	5752	5476	Fungi	Ascomycota	Saccharomycetes	Saccharomycetales	Debaryomycetaceae	Candida	0	1	1	0	1	0	0	0	0	0	0	0	0	1	0	0	0	0	1	0	1	0	0	0	0	0	1	1	1	0
Candida arabinofermentans	GCA_001661425.1	13233932	5827	130810	Fungi	Ascomycota	Saccharomycetes	Saccharomycetales	Pichiaceae	Ogataea	0	1	1	0	1	0	0	0	0	0	0	0	0	1	0	0	0	0	0	0	0	0	0	0	0	0	1	0	1	0
Candida auris	GCA_001189475.1	12498763	7461	498019	Fungi	Ascomycota	Saccharomycetes	Saccharomycetales	Metschnikowiaceae	Candida	0	1	1	0	0	0	0	0	0	0	0	0	0	0	0	0	0	0	1	0	1	0	0	0	0	0	1	2	1	0
Candida boidinii	GCA_002007985.1	18791961	5181	5477	Fungi	Ascomycota	Saccharomycetes	Saccharomycetales	Pichiaceae	Ogataea	0	1	1	0	1	0	1	0	0	0	0	0	0	0	0	0	0	0	0	0	0	0	0	0	0	0	1	0	0	0
Candida dubliniensis	GCA_000026945.1	14618422	5860	42374	Fungi	Ascomycota	Saccharomycetes	Saccharomycetales	Debaryomycetaceae	Candida	0	1	1	0	0	0	0	0	0	0	0	0	0	1	0	0	0	0	1	0	1	0	0	0	0	0	1	1	1	0
Candida tropicalis	GCA_000006335.3	14630139	6254	5482	Fungi	Ascomycota	Saccharomycetes	Saccharomycetales	Debaryomycetaceae	Candida	0	1	1	0	1	0	0	0	0	0	0	0	0	1	0	0	0	0	1	0	1	0	0	0	0	0	1	1	1	0
Candolleomyces aberdarensis	GCA_004126415.1	60609341	14703	2316362	Fungi	Basidiomycota	Agaricomycetes	Agaricales	Psathyrellaceae	Candolleomyces	3	1	1	2	0	1	0	1	0	0	0	0	1	1	0	8	0	0	1	0	1	1	0	0	0	0	0	0	1	1
Candolleomyces efflorescens	GCA_027579765.1	33573984	9128	2917767	Fungi	Basidiomycota	Agaricomycetes	Agaricales	Psathyrellaceae	Candolleomyces	1	0	1	0	0	0	0	0	0	0	0	0	0	0	0	3	0	0	1	0	1	1	0	0	0	0	1	0	0	0
Candolleomyces eurysporus	GCA_027579435.1	69973860	16680	2828524	Fungi	Basidiomycota	Agaricomycetes	Agaricales	Psathyrellaceae	Candolleomyces	1	1	2	1	0	0	0	1	0	0	0	0	1	1	0	12	0	0	1	0	1	0	0	0	0	0	0	0	0	0
Cantharellus anzutake	GCA_015039405.1	120173979	16958	1750568	Fungi	Basidiomycota	Agaricomycetes	Cantharellales	Cantharellaceae	Cantharellus	1	2	1	2	0	0	0	0	1	0	0	0	2	3	0	2	0	0	0	1	1	1	0	0	0	0	1	0	2	0
Capronia coronata	GCA_000585585.1	25807613	9231	43229	Fungi	Ascomycota	Eurotiomycetes	Chaetothyriales	Herpotrichiellaceae	Capronia	1	1	1	1	1	1	1	0	1	0	0	0	2	1	2	0	0	0	0	1	0	0	0	0	0	0	1	1	1	0
Capronia epimyces	GCA_000585565.1	28889638	10469	43228	Fungi	Ascomycota	Eurotiomycetes	Chaetothyriales	Herpotrichiellaceae	Capronia	1	1	1	1	1	1	1	0	0	0	0	0	4	1	2	0	0	0	0	1	0	0	0	0	0	0	1	0	1	0
Catenaria anguillulae	GCA_002102555.1	41337528	12754	109876	Fungi	Blastocladiomycota	Blastocladiomycetes	Blastocladiales	Catenariaceae	Catenaria	1	2	1	2	0	1	0	2	0	1	0	0	1	2	0	0	0	0	0	0	0	1	0	0	0	0	1	1	1	0
Caulochytrium protostelioides	GCA_003615035.1	10621642	3328	1555241	Fungi	Chytridiomycota	Chytridiomycetes	Caulochytriales	Caulochytriaceae	Caulochytrium	0	1	0	0	0	0	0	1	0	0	0	0	0	0	0	0	0	0	0	0	0	0	0	0	0	0	0	0	0	0
Cenococcum geophilum	GCA_001692895.1	177557160	14707	5570	Fungi	Ascomycota	Dothideomycetes	NA	Gloniaceae	Cenococcum	1	1	1	1	1	1	1	0	0	0	0	0	4	1	0	0	2	1	1	1	0	0	0	0	0	0	1	1	1	0
Ceraceosorus bombacis	GCA_900000165.1	26090089	8022	401625	Fungi	Basidiomycota	Exobasidiomycetes	Ceraceosorales	Ceraceosoraceae	Ceraceosorus	1	1	1	1	1	0	0	0	0	1	0	0	0	1	0	0	1	0	0	1	1	0	0	0	0	0	1	0	0	1
Ceraceosorus guamensis	GCA_003144195.1	24148100	7822	1522189	Fungi	Basidiomycota	Exobasidiomycetes	Ceraceosorales	Ceraceosoraceae	Ceraceosorus	1	1	1	1	1	0	1	1	0	1	0	0	0	1	0	0	1	0	0	1	1	0	0	0	0	0	1	0	0	1
Ceratobasidium theobromae	GCA_009078325.1	31201167	9262	1582974	Fungi	Basidiomycota	Agaricomycetes	Cantharellales	Ceratobasidiaceae	Ceratobasidium	2	1	1	1	1	1	0	2	0	0	0	0	0	2	0	0	1	0	0	0	1	1	0	0	0	0	1	0	0	1
Ceratocystis fimbriata	GCA_000389695.3	30159987	7266	5158	Fungi	Ascomycota	Sordariomycetes	Microascales	Ceratocystidaceae	Ceratocystis	1	1	1	1	1	1	1	0	0	0	0	0	1	1	0	0	0	1	0	0	0	0	0	0	0	0	1	0	1	0
Ceratocystis platani	GCA_000978885.1	29181415	5622	88771	Fungi	Ascomycota	Sordariomycetes	Microascales	Ceratocystidaceae	Ceratocystis	1	1	1	1	0	0	1	0	0	0	0	0	0	1	0	0	0	0	0	0	0	0	0	0	0	0	1	0	1	0
Cercospora berteroae	GCA_002933655.1	33892839	11903	357750	Fungi	Ascomycota	Dothideomycetes	Mycosphaerellales	Mycosphaerellaceae	Cercospora	1	1	1	1	1	1	1	0	0	0	0	0	4	1	0	0	3	2	1	1	0	0	0	0	0	0	1	1	1	0
Cercospora beticola	GCA_002742065.1	37057033	12275	122368	Fungi	Ascomycota	Dothideomycetes	Mycosphaerellales	Mycosphaerellaceae	Cercospora	1	1	1	1	1	1	1	0	0	0	0	0	4	1	0	0	3	2	1	1	0	0	0	0	0	0	1	2	1	0
Cercospora zeae-maydis	GCA_010093985.1	46606234	12008	135779	Fungi	Ascomycota	Dothideomycetes	Mycosphaerellales	Mycosphaerellaceae	Cercospora	1	1	1	1	1	1	1	0	0	0	0	0	3	1	0	0	3	2	1	1	0	0	0	0	0	0	1	1	1	0
Cerioporus squamosus	GCA_022592435.1	55468683	15284	2829415	Fungi	Basidiomycota	Agaricomycetes	Polyporales	Polyporaceae	Cerioporus	2	1	1	1	1	2	0	0	0	0	0	0	2	2	0	2	2	0	1	3	1	1	0	0	0	0	1	0	1	1
Cetraspora pellucida	GCA_910591915.1	435082676	22053	1433469	Fungi	Mucoromycota	Glomeromycetes	Diversisporales	Gigasporaceae	Cetraspora	3	1	2	1	0	1	1	0	0	1	1	0	0	2	0	0	0	2	0	0	0	1	0	0	0	0	0	1	0	0
Chaenotheca gracillima	GCA_026023695.1	22648696	7656	164576	Fungi	Ascomycota	Coniocybomycetes	Coniocybales	Coniocybaceae	Chaenotheca	1	1	1	1	1	1	1	0	0	0	0	0	1	1	0	0	0	1	0	0	0	0	0	0	0	0	1	0	1	0
Chaetomium globosum	GCA_000143365.1	34886939	11048	38033	Fungi	Ascomycota	Sordariomycetes	Sordariales	Chaetomiaceae	Chaetomium	1	1	1	1	1	1	1	0	0	0	0	1	1	0	6	0	3	1	0	0	0	0	0	0	0	0	1	2	1	0
Chiua virens	GCA_019787685.1	48496802	11148	1914213	Fungi	Basidiomycota	Agaricomycetes	Boletales	Boletaceae	Chiua	2	1	2	1	0	1	0	0	0	0	0	0	0	1	0	0	0	0	0	1	1	1	0	0	0	0	1	0	0	0
Chlamydoabsidia padenii	GCA_025330725.1	34328230	13489	90267	Fungi	Mucoromycota	Mucoromycetes	Mucorales	Cunninghamellaceae	Chlamydoabsidia	2	2	1	3	2	0	1	1	1	0	0	0	0	5	0	0	0	0	1	1	1	2	1	0	0	1	1	2	1	0
Chlorociboria aeruginascens	GCA_002276475.2	33056518	8648	296797	Fungi	Ascomycota	Leotiomycetes	Helotiales	Chlorociboriaceae	Chlorociboria	1	1	1	1	0	1	1	0	0	0	0	0	5	1	1	0	1	2	0	0	0	0	0	0	0	0	1	0	1	0
Choanephora cucurbitarum	GCA_001683725.1	29096908	11977	101091	Fungi	Mucoromycota	Mucoromycetes	Mucorales	Choanephoraceae	Choanephora	1	1	2	2	2	0	1	1	1	0	0	0	0	4	0	0	0	0	1	1	1	2	0	0	0	1	1	2	1	0
Choiromyces venosus	GCA_003788595.2	126035033	17934	44640	Fungi	Ascomycota	Pezizomycetes	Pezizales	Tuberaceae	Choiromyces	1	1	1	1	0	1	1	0	0	0	0	0	4	1	0	0	6	0	0	1	0	0	0	0	0	0	0	1	0	0
Chytridium lagenaria	GCA_025449115.1	42380874	14269	64509	Fungi	Chytridiomycota	Chytridiomycetes	Chytridiales	Chytridiaceae	Chytridium	1	1	0	0	0	0	1	1	1	0	0	0	0	2	0	0	0	0	0	0	1	0	1	0	0	0	0	2	0	0
Chytriomyces cf.	GCA_025435555.1	38103441	15515	1907226	Fungi	Chytridiomycota	Chytridiomycetes	Chytridiales	Chytriomycetaceae	Chytriomyces	2	1	1	2	0	0	1	0	0	1	0	0	1	2	2	0	0	0	2	0	1	0	1	0	0	0	1	7	2	0
Chytriomyces confervae	GCA_006535975.1	35973405	10712	246404	Fungi	Chytridiomycota	Chytridiomycetes	Chytridiales	Chytriomycetaceae	Chytriomyces	0	1	1	2	0	0	1	0	0	1	0	0	0	3	2	0	0	0	1	0	1	0	4	0	0	0	1	5	1	0
Chytriomyces hyalinus	GCA_027604085.1	28404701	11171	4814	Fungi	Chytridiomycota	Chytridiomycetes	Chytridiales	Chytriomycetaceae	Chytriomyces	1	1	1	1	0	0	1	0	0	1	0	0	0	2	2	0	0	0	2	0	1	0	2	0	0	0	0	7	0	0
Ciborinia camelliae	GCA_025890175.1	46380254	11490	647257	Fungi	Ascomycota	Leotiomycetes	Helotiales	Sclerotiniaceae	Ciborinia	1	1	1	1	1	1	0	0	0	0	0	1	4	1	1	0	2	3	0	1	0	0	0	0	0	0	1	0	1	0
Circinella minor	GCA_016758965.1	54179589	14144	1195481	Fungi	Mucoromycota	Mucoromycetes	Mucorales	Lichtheimiaceae	Circinella	1	1	1	1	1	0	1	1	0	0	0	0	0	4	0	0	0	0	1	1	1	1	1	0	0	1	1	1	1	0
Circinella umbellata	GCA_025093555.1	51270100	14692	101103	Fungi	Mucoromycota	Mucoromycetes	Mucorales	Lichtheimiaceae	Circinella	1	1	1	1	1	0	1	1	0	0	0	0	0	4	0	0	0	0	1	1	1	1	1	0	0	1	1	1	1	0
Cirrosporium novae-zelandiae	GCA_026023565.1	31405350	9636	1130053	Fungi	Ascomycota	Xylobotryomycetes	Xylobotryales	Cirrosporiaceae	Cirrosporium	1	1	1	1	1	0	1	0	0	0	0	0	1	1	0	0	1	0	0	0	0	0	0	0	0	0	1	0	1	0
Cladochytrium replicatum	GCA_025526935.1	50665862	16305	109936	Fungi	Chytridiomycota	Chytridiomycetes	Cladochytriales	Cladochytriaceae	Cladochytrium	2	1	3	2	0	0	1	0	0	0	0	0	1	3	0	0	0	0	2	0	0	0	1	0	0	0	0	2	1	1
Cladochytrium tenue	GCA_026954515.1	48956424	15890	1604274	Fungi	Chytridiomycota	Chytridiomycetes	Cladochytriales	Cladochytriaceae	Cladochytrium	0	1	1	2	0	0	2	0	0	0	2	0	0	2	0	0	0	0	2	0	0	0	0	0	0	0	0	3	0	1
Cladonia borealis	GCA_018257855.2	36013978	10749	184061	Fungi	Ascomycota	Lecanoromycetes	Lecanorales	Cladoniaceae	Cladonia	1	1	1	1	1	0	1	0	0	0	0	0	4	1	0	0	2	0	0	1	0	0	0	0	0	0	1	2	1	0
Cladophialophora carrionii	GCA_000365165.2	28991111	10373	86049	Fungi	Ascomycota	Eurotiomycetes	Chaetothyriales	Herpotrichiellaceae	Cladophialophora	1	1	1	1	1	1	1	0	0	0	0	0	2	2	3	0	0	0	0	1	0	0	0	0	0	0	1	0	1	0
Cladophialophora psammophila	GCA_000585535.1	39420127	13421	1182553	Fungi	Ascomycota	Eurotiomycetes	Chaetothyriales	Herpotrichiellaceae	Cladophialophora	1	1	1	1	1	1	1	0	0	0	0	0	1	2	3	0	0	0	0	1	0	0	0	0	0	0	1	0	1	0
Cladophialophora yegresii	GCA_000585515.1	27898422	10118	470704	Fungi	Ascomycota	Eurotiomycetes	Chaetothyriales	Herpotrichiellaceae	Cladophialophora	1	1	1	1	1	1	1	0	0	0	0	0	1	2	3	0	0	0	0	1	0	0	0	0	0	0	1	0	1	0
Clathrospora elynae	GCA_010015635.1	37388950	13611	706981	Fungi	Ascomycota	Dothideomycetes	Pleosporales	Diademaceae	Clathrospora	1	1	1	1	1	1	1	0	0	0	0	0	5	1	4	0	2	2	1	1	0	0	0	0	0	0	2	1	1	0
Clathrus columnatus	GCA_020884735.1	36509728	10514	1419009	Fungi	Basidiomycota	Agaricomycetes	Phallales	Clathraceae	Clathrus	2	1	1	1	0	1	0	0	0	0	0	0	2	1	0	0	0	0	0	1	0	0	0	0	0	0	1	0	0	0
Claviceps capensis	GCA_018360045.1	27728898	7917	1649128	Fungi	Ascomycota	Sordariomycetes	Hypocreales	Clavicipitaceae	Claviceps	0	1	1	1	1	1	1	0	0	0	0	0	10	1	0	0	0	1	0	0	0	0	0	0	0	0	1	1	1	0
Claviceps monticola	GCA_018360055.1	27635999	7818	1649129	Fungi	Ascomycota	Sordariomycetes	Hypocreales	Clavicipitaceae	Claviceps	0	1	1	1	1	1	1	0	0	0	0	0	1	1	0	0	0	1	0	0	0	0	0	0	0	0	1	1	1	0
Claviceps purpurea	GCA_000347355.1	32091443	8823	5111	Fungi	Ascomycota	Sordariomycetes	Hypocreales	Clavicipitaceae	Claviceps	0	1	1	1	1	1	1	0	0	0	0	0	25	1	0	0	0	1	0	0	0	0	0	0	0	0	1	1	1	0
Clavispora lusitaniae	GCA_000003835.1	12114892	5936	36911	Fungi	Ascomycota	Saccharomycetes	Saccharomycetales	Metschnikowiaceae	Clavispora	0	1	1	0	0	0	0	0	0	0	0	0	0	0	0	0	0	0	1	0	1	0	0	0	0	0	1	2	1	0
Clohesyomyces aquaticus	GCA_002105025.1	49677730	15811	1231657	Fungi	Ascomycota	Dothideomycetes	Pleosporales	Lindgomycetaceae	Clohesyomyces	1	1	1	1	1	0	1	0	0	0	0	0	7	1	5	0	3	0	1	1	0	0	0	0	0	0	1	2	1	0
Clonostachys byssicola	GCA_902006505.2	55062982	18488	160290	Fungi	Ascomycota	Sordariomycetes	Hypocreales	Bionectriaceae	Clonostachys	1	1	1	1	1	1	1	0	0	0	0	1	5	1	0	0	2	1	1	0	0	0	0	0	0	0	1	1	2	0
Clonostachys chloroleuca	GCA_902074915.1	61358807	19562	1926264	Fungi	Ascomycota	Sordariomycetes	Hypocreales	Bionectriaceae	Clonostachys	1	1	1	1	1	1	1	0	0	0	0	1	5	1	0	0	2	1	1	0	0	0	0	0	0	0	1	1	2	0
Clonostachys rhizophaga	GCA_902077795.2	59593020	18886	160324	Fungi	Ascomycota	Sordariomycetes	Hypocreales	Bionectriaceae	Clonostachys	1	1	1	1	1	1	1	0	0	0	0	0	5	1	0	0	2	1	0	0	0	0	0	0	0	0	1	1	2	0
Clydaea vesicula	GCA_027604065.1	24650228	8647	447962	Fungi	Chytridiomycota	Chytridiomycetes	Lobulomycetales	Lobulomycetaceae	Clydaea	1	1	2	3	0	0	1	2	1	0	0	0	2	3	0	0	0	0	1	0	0	1	0	1	0	0	0	0	2	0
Coccidioides immitis	GCA_000149335.2	29016019	9757	5501	Fungi	Ascomycota	Eurotiomycetes	Onygenales	Onygenaceae	Coccidioides	1	1	1	1	1	0	1	1	0	0	0	0	3	1	0	0	0	1	0	0	0	0	0	0	0	0	1	0	1	0
Coelomomyces lativittatus	GCA_026928455.1	22882397	7352	945690	Fungi	Blastocladiomycota	Blastocladiomycetes	Blastocladiales	Coelomomycetaceae	Coelomomyces	0	1	0	0	0	0	0	0	0	0	0	0	0	1	0	0	0	0	0	0	0	1	0	0	0	0	1	0	0	0
Coemansia mojavensis	GCA_025766245.1	14291446	6859	4864	Fungi	Zoopagomycota	Kickxellomycetes	Kickxellales	Kickxellaceae	Coemansia	2	2	1	1	1	0	0	0	0	0	0	0	0	2	0	0	0	0	2	1	0	1	0	0	0	0	0	1	1	1
Coemansia reversa	GCA_002705745.1	21837878	7341	61392	Fungi	Zoopagomycota	Kickxellomycetes	Kickxellales	Kickxellaceae	Coemansia	2	1	1	1	1	0	0	0	0	0	0	0	0	2	0	0	0	0	1	0	0	1	0	0	0	0	0	2	1	0
Coemansia spiralis	GCA_025766305.1	18931979	7246	417178	Fungi	Zoopagomycota	Kickxellomycetes	Kickxellales	Kickxellaceae	Coemansia	1	1	1	1	1	0	0	0	0	0	0	0	0	2	0	0	0	0	1	1	1	1	0	0	0	0	0	1	1	0
Cokeromyces recurvatus	GCA_025118155.1	28120762	10913	90255	Fungi	Mucoromycota	Mucoromycetes	Mucorales	Mucoraceae	Cokeromyces	1	2	2	2	2	0	1	2	1	0	0	0	0	3	0	0	0	0	1	1	1	1	0	0	0	1	1	1	1	1
Coleophoma crateriformis	GCA_003369635.1	40652013	13257	565419	Fungi	Ascomycota	Leotiomycetes	Helotiales	Dermateaceae	Coleophoma	1	1	1	1	1	1	1	0	1	0	0	0	8	2	4	0	1	2	2	1	0	0	0	0	0	0	1	0	1	0
Coleophoma cylindrospora	GCA_003369665.1	42480816	14177	1849047	Fungi	Ascomycota	Leotiomycetes	Helotiales	Dermateaceae	Coleophoma	1	1	1	1	1	1	1	0	0	0	0	0	7	1	4	0	1	3	2	1	0	0	0	0	0	0	1	0	1	0
Colletotrichum graminicola	GCA_000149035.1	51644307	12020	31870	Fungi	Ascomycota	Sordariomycetes	Glomerellales	Glomerellaceae	Colletotrichum	1	1	1	1	1	1	1	0	0	0	0	0	3	1	3	0	3	1	1	0	0	0	0	0	0	0	1	2	1	0
Colletotrichum higginsianum	GCA_000313795.2	49084868	16141	80884	Fungi	Ascomycota	Sordariomycetes	Glomerellales	Glomerellaceae	Colletotrichum	1	1	1	1	1	1	1	0	0	0	0	0	2	1	2	0	2	0	1	0	0	0	0	0	0	0	2	2	1	0
Collybiopsis confluens	GCA_013368555.1	60120426	15320	2823264	Fungi	Basidiomycota	Agaricomycetes	Agaricales	Omphalotaceae	Collybiopsis	2	0	0	1	0	0	0	0	0	0	0	0	2	3	0	5	0	0	0	1	1	1	0	0	0	0	1	1	0	1
Collybiopsis luxurians	GCA_000827265.1	66281670	22036	2773346	Fungi	Basidiomycota	Agaricomycetes	Agaricales	Omphalotaceae	Collybiopsis	2	1	1	1	0	2	0	0	1	0	0	0	1	3	0	7	0	0	1	1	2	1	0	0	0	0	1	1	0	0
Conidiobolus coronatus	GCA_001566745.1	39903661	10568	34488	Fungi	Zoopagomycota	Entomophthoromycetes	Entomophthorales	Ancylistaceae	Conidiobolus	2	1	1	1	0	0	0	1	1	0	0	0	0	1	0	0	0	0	0	0	0	0	0	1	0	0	0	1	1	1
Coniella lustricola	GCA_003019895.1	36564510	11314	2025994	Fungi	Ascomycota	Sordariomycetes	Diaporthales	Schizoparmaceae	Coniella	1	1	1	1	0	1	1	0	0	0	0	0	2	2	2	0	1	1	1	0	0	0	0	0	0	0	1	1	1	0
Coniferiporia weirii	GCA_024195185.1	40274806	9937	135589	Fungi	Basidiomycota	Agaricomycetes	Hymenochaetales	Hymenochaetaceae	Coniferiporia	2	1	1	1	1	2	0	0	0	0	0	0	1	2	0	0	0	0	1	1	0	1	0	0	0	0	1	0	0	0
Coniochaeta hoffmannii	GCA_030052785.1	32670095	10382	91930	Fungi	Ascomycota	Sordariomycetes	Coniochaetales	Coniochaetaceae	Coniochaeta	1	1	1	1	1	1	1	0	0	0	0	0	2	2	7	0	2	1	0	0	0	0	0	0	0	0	1	1	2	0
Coniochaeta ligniaria	GCA_001879275.1	42382780	13658	177197	Fungi	Ascomycota	Sordariomycetes	Coniochaetales	Coniochaetaceae	Coniochaeta	1	1	1	1	1	1	1	0	0	0	0	1	4	2	7	0	2	1	0	0	0	0	0	0	0	0	1	2	2	0
Coniochaeta pulveracea	GCA_003635345.1	30020651	9535	177199	Fungi	Ascomycota	Sordariomycetes	Coniochaetales	Coniochaetaceae	Coniochaeta	1	1	1	1	1	1	1	0	0	0	0	0	2	2	2	0	3	1	0	0	0	0	0	0	0	0	1	1	1	0
Coniophora puteana	GCA_000271625.1	42968544	13758	80637	Fungi	Basidiomycota	Agaricomycetes	Boletales	Coniophoraceae	Coniophora	2	1	1	0	0	2	0	0	0	0	0	0	0	2	0	0	0	0	1	0	1	1	0	0	0	0	1	0	0	0
Coniosporium apollinis	GCA_000281105.1	28645321	9308	61459	Fungi	Ascomycota	Dothideomycetes	NA	NA	Coniosporium	1	1	1	1	1	1	1	1	0	0	0	0	1	1	0	0	2	1	1	1	0	0	0	0	0	0	1	1	1	0
Coprinellus aureogranulatus	GCA_027627275.1	58242426	20316	752674	Fungi	Basidiomycota	Agaricomycetes	Agaricales	Psathyrellaceae	Coprinellus	4	0	1	4	0	2	0	1	0	0	0	0	0	1	0	2	0	0	1	0	1	0	0	0	0	0	2	1	1	0
Coprinellus micaceus	GCA_004369175.1	77386123	23412	71717	Fungi	Basidiomycota	Agaricomycetes	Agaricales	Psathyrellaceae	Coprinellus	2	1	1	2	1	2	0	1	1	0	0	0	1	2	0	1	0	0	1	1	1	1	0	0	0	0	1	1	0	0
Coprinopsis cinerea	GCA_000182895.1	36192590	13356	5346	Fungi	Basidiomycota	Agaricomycetes	Agaricales	Psathyrellaceae	Coprinopsis	2	1	1	1	1	2	0	1	0	0	0	0	1	2	0	8	0	0	1	1	1	1	0	0	0	0	1	0	0	0
Coprinopsis marcescibilis	GCA_004369085.1	38912666	14628	230819	Fungi	Basidiomycota	Agaricomycetes	Agaricales	Psathyrellaceae	Coprinopsis	2	1	1	1	1	2	0	1	1	0	0	0	1	2	0	4	0	0	1	0	1	1	0	0	0	0	1	1	1	0
Cordyceps fumosorosea	GCA_001636725.1	33485962	10061	114497	Fungi	Ascomycota	Sordariomycetes	Hypocreales	Cordycipitaceae	Cordyceps	1	1	1	1	1	1	1	0	0	0	0	0	0	1	0	0	1	1	0	0	0	0	0	0	0	0	1	1	1	0
Cordyceps javanica	GCA_006981975.1	34972450	11142	43265	Fungi	Ascomycota	Sordariomycetes	Hypocreales	Cordycipitaceae	Cordyceps	1	1	1	1	1	1	1	0	0	0	0	0	1	0	1	0	3	1	0	0	0	0	0	0	0	0	1	0	2	0
Cordyceps militaris	GCA_000225605.1	32268578	9651	73501	Fungi	Ascomycota	Sordariomycetes	Hypocreales	Cordycipitaceae	Cordyceps	1	1	1	1	1	1	1	0	0	0	0	0	1	1	1	0	3	1	0	0	0	0	0	0	0	0	1	1	2	0
Corynespora cassiicola	GCA_003016335.1	44846156	17158	59586	Fungi	Ascomycota	Dothideomycetes	Pleosporales	Corynesporascaceae	Corynespora	1	1	1	1	1	1	1	0	1	1	0	0	6	1	6	0	4	1	1	1	0	0	0	0	0	0	1	1	1	0
Crassisporium funariophilum	GCA_014925845.1	37117181	13636	1954473	Fungi	Basidiomycota	Agaricomycetes	Agaricales	Crassisporiaceae	Crassisporium	2	1	1	2	1	1	0	0	0	0	0	0	1	2	0	3	0	0	1	0	1	1	0	0	0	0	1	0	0	0
Crepidotus variabilis	GCA_015657495.1	38577924	14572	179855	Fungi	Basidiomycota	Agaricomycetes	Agaricales	Crepidotaceae	Crepidotus	2	1	1	2	1	2	0	1	0	0	0	0	1	1	0	6	0	0	1	0	1	1	0	0	0	0	1	1	0	0
Cristinia sonorae	GCA_021029105.1	30130434	11356	1940300	Fungi	Basidiomycota	Agaricomycetes	Atheliales	Atheliaceae	Cristinia	1	1	0	1	1	2	0	0	1	0	0	0	3	2	0	5	4	0	1	1	1	1	0	0	0	0	1	0	0	0
Cronartium quercuum	GCA_015951145.1	76567842	13765	60197	Fungi	Basidiomycota	Pucciniomycetes	Pucciniales	Coleosporiaceae	Cronartium	1	1	1	1	1	0	1	1	0	1	0	0	1	1	5	1	0	0	0	0	1	0	0	0	0	0	1	0	0	0
Crucibulum laeve	GCA_004379715.1	44728771	14217	68775	Fungi	Basidiomycota	Agaricomycetes	Agaricales	NA	Crucibulum	2	1	1	1	1	2	0	1	0	0	0	0	1	2	0	8	0	0	1	1	1	1	0	0	0	0	1	1	0	0
Cryomyces minteri	GCA_005059845.1	44140187	13960	331657	Fungi	Ascomycota	Dothideomycetes	NA	NA	Cryomyces	1	4	1	2	1	2	2	1	1	0	0	0	1	2	0	0	0	1	0	0	0	0	0	0	0	0	1	0	0	0
Cryphonectria parasitica	GCA_011745365.1	43870411	11606	5116	Fungi	Ascomycota	Sordariomycetes	Diaporthales	Cryphonectriaceae	Cryphonectria	1	1	2	1	1	1	2	0	0	0	0	3	4	2	2	0	2	1	1	0	0	0	0	0	0	0	1	1	1	0
Cryptococcus neoformans	GCA_000091045.1	19051922	6632	5207	Fungi	Basidiomycota	Tremellomycetes	Tremellales	Cryptococcaceae	Cryptococcus	1	1	1	1	1	1	0	0	0	1	0	0	0	1	0	0	0	0	0	1	1	0	0	0	0	0	1	0	0	1
Cubamyces lactineus	GCA_022376465.1	36341856	12284	1391043	Fungi	Basidiomycota	Agaricomycetes	Polyporales	Polyporaceae	Leiotrametes	2	1	1	1	1	2	0	0	0	0	0	0	5	2	0	1	1	0	1	1	1	1	0	0	0	0	1	1	1	1
Cubamyces menziesii	GCA_022606275.1	35218293	12529	2136021	Fungi	Basidiomycota	Agaricomycetes	Polyporales	Polyporaceae	Leiotrametes	2	1	1	1	1	2	0	0	1	0	0	0	3	2	0	2	1	0	1	1	1	1	0	0	0	0	1	1	1	1
Cucumispora dikerogammari	GCA_014805705.1	32414047	4599	658444	Fungi	Microsporidia	NA	NA	NA	Cucumispora	0	1	0	0	0	1	0	0	0	0	0	0	0	0	0	0	0	0	0	0	0	0	0	0	0	0	0	0	0	0
Cucurbitaria berberidis	GCA_010015615.1	32905402	12426	45142	Fungi	Ascomycota	Dothideomycetes	Pleosporales	Cucurbitariaceae	Cucurbitaria	1	1	2	1	1	1	1	0	0	0	0	0	7	1	4	0	2	1	1	1	0	0	0	0	1	0	2	1	1	0
Cudoniella acicularis	GCA_013054445.1	58976596	15765	354080	Fungi	Ascomycota	Leotiomycetes	Helotiales	Tricladiaceae	Cudoniella	1	1	1	2	0	1	1	0	0	0	0	0	9	2	2	0	4	0	0	1	0	0	0	0	0	0	1	0	1	0
Cunninghamella echinulata	GCA_025201675.1	29002410	10441	76405	Fungi	Mucoromycota	Mucoromycetes	Mucorales	Cunninghamellaceae	Cunninghamella	1	2	1	2	2	0	1	2	1	0	0	0	0	4	0	0	0	0	1	1	1	1	1	0	0	1	1	1	1	0
Curvularia clavata	GCA_023920165.1	32360171	10170	95742	Fungi	Ascomycota	Dothideomycetes	Pleosporales	Pleosporaceae	Curvularia	1	1	1	1	1	1	1	0	0	0	0	0	2	1	4	0	1	1	1	1	0	0	0	0	0	0	2	1	1	0
Curvularia kusanoi	GCA_011058905.1	33340726	11490	90978	Fungi	Ascomycota	Dothideomycetes	Pleosporales	Pleosporaceae	Curvularia	1	2	2	1	1	0	1	0	0	0	0	0	3	1	2	0	0	2	1	0	0	0	0	0	0	0	2	1	1	0
Cutaneotrichosporon oleaginosum	GCA_001027345.1	19835558	8320	879819	Fungi	Basidiomycota	Tremellomycetes	Trichosporonales	Trichosporonaceae	Cutaneotrichosporon	1	1	2	1	1	0	0	0	1	0	0	0	0	1	0	0	0	1	0	1	1	0	0	0	0	0	1	0	0	1
Cyathus striatus	GCA_015501535.1	91180015	23512	68777	Fungi	Basidiomycota	Agaricomycetes	Agaricales	Nidulariaceae	Cyathus	2	1	1	1	1	2	0	0	1	0	0	0	1	2	0	42	0	0	1	1	1	1	0	0	0	0	1	1	1	0
Cyberlindnera fabianii	GCA_001983305.1	12188250	5509	36022	Fungi	Ascomycota	Saccharomycetes	Saccharomycetales	Phaffomycetaceae	Cyberlindnera	0	1	1	1	1	0	1	0	0	0	0	0	0	0	0	0	0	0	1	0	0	0	0	0	0	0	1	1	1	0
Cyberlindnera jadinii	GCA_001245095.1	12707304	5057	4903	Fungi	Ascomycota	Saccharomycetes	Saccharomycetales	Phaffomycetaceae	Cyberlindnera	0	1	1	1	1	0	1	0	0	0	0	0	0	0	0	0	0	0	1	0	1	0	0	0	0	0	1	1	1	0
Cyclocybe aegerita	GCA_902728275.1	44790776	13341	1973307	Fungi	Basidiomycota	Agaricomycetes	Agaricales	Bolbitiaceae	Cyclocybe	0	1	1	1	1	2	0	0	1	0	0	0	1	2	0	5	0	0	1	1	1	1	0	0	0	0	1	0	0	0
Cylindrobasidium torrendii	GCA_000934385.1	31574086	13929	394432	Fungi	Basidiomycota	Agaricomycetes	Agaricales	Physalacriaceae	Cylindrobasidium	4	1	1	1	0	1	0	0	1	0	0	0	1	2	0	3	3	0	1	1	1	1	0	0	0	0	1	1	0	0
Cylindrodendrum hubeiense	GCA_014621425.1	48811092	13745	595255	Fungi	Ascomycota	Sordariomycetes	Hypocreales	Nectriaceae	Cylindrodendrum	1	1	1	1	1	1	1	0	0	0	0	0	2	0	1	0	1	1	0	0	0	0	0	0	0	0	1	0	1	0
Cyphellophora europaea	GCA_000365145.2	28781303	11094	293227	Fungi	Ascomycota	Eurotiomycetes	Chaetothyriales	Cyphellophoraceae	Cyphellophora	1	2	1	1	1	1	1	0	0	0	0	1	2	1	1	0	0	0	1	0	0	0	0	0	0	0	1	1	1	0
Cytidiella melzeri	GCA_022592445.1	50894641	13045	1883072	Fungi	Basidiomycota	Agaricomycetes	Polyporales	Irpicaceae	Cytidiella	2	2	1	1	1	1	0	0	0	0	0	0	4	2	0	0	0	0	1	1	1	1	0	0	0	0	1	0	1	0
Cytospora leucostoma	GCA_003795295.1	37570220	10072	1230097	Fungi	Ascomycota	Sordariomycetes	Diaporthales	Valsaceae	Cytospora	1	1	1	1	1	1	1	0	0	0	0	0	2	2	1	0	0	1	1	0	0	0	0	0	0	0	1	2	1	0
Dacryopinax primogenitus	GCA_000292625.1	29503487	10240	1858805	Fungi	Basidiomycota	Dacrymycetes	Dacrymycetales	Dacrymycetaceae	Dacryopinax	2	1	1	1	1	1	0	0	0	0	0	0	0	2	0	2	0	0	1	1	1	1	0	0	0	0	1	0	0	1
Dactylella cylindrospora	GCA_012184295.1	37713459	10528	1814901	Fungi	Ascomycota	Orbiliomycetes	Orbiliales	Orbiliaceae	Dactylella	1	0	1	1	1	1	1	1	1	0	0	0	1	1	0	0	2	1	0	0	0	0	0	0	0	0	0	1	1	0
Dactylellina cionopaga	GCA_012184355.1	43120050	10546	47266	Fungi	Ascomycota	Orbiliomycetes	Orbiliales	Orbiliaceae	Dactylellina	0	1	1	1	1	0	1	1	0	0	0	0	2	1	0	0	3	0	0	0	0	0	0	0	0	0	0	0	1	0
Dactylellina haptotyla	GCA_000441935.1	39531920	10959	430498	Fungi	Ascomycota	Orbiliomycetes	Orbiliales	Orbiliaceae	Dactylellina	1	1	1	1	1	1	1	1	0	0	0	0	2	1	0	0	2	1	1	0	0	0	0	0	0	0	1	0	1	0
Dactylonectria estremocensis	GCA_020744375.1	64663708	19198	1079267	Fungi	Ascomycota	Sordariomycetes	Hypocreales	Nectriaceae	Dactylonectria	1	1	1	1	1	1	1	0	0	0	0	0	3	1	1	0	0	1	1	0	0	0	0	0	0	0	1	1	1	0
Dactylonectria macrodidyma	GCA_020744425.1	77328613	21303	307937	Fungi	Ascomycota	Sordariomycetes	Hypocreales	Nectriaceae	Dactylonectria	1	2	2	1	1	2	2	0	0	0	0	0	4	1	0	0	0	1	1	0	0	0	0	0	0	0	1	1	1	0
Daedalea quercina	GCA_001632345.1	32736329	12191	40437	Fungi	Basidiomycota	Agaricomycetes	Polyporales	Fomitopsidaceae	Daedalea	2	1	1	1	1	2	0	0	0	0	0	0	2	2	0	1	1	0	1	1	1	1	0	0	0	0	1	1	1	0
Daedaleopsis nitida	GCA_022606115.1	41833432	14978	1140402	Fungi	Basidiomycota	Agaricomycetes	Polyporales	Polyporaceae	Hexagonia	3	1	1	1	1	2	0	0	0	0	0	0	2	2	0	9	1	0	1	1	1	1	0	0	0	0	1	1	1	0
Daldinia childiae	GCA_008694065.1	38652569	9567	326645	Fungi	Ascomycota	Sordariomycetes	Xylariales	Hypoxylaceae	Daldinia	1	1	1	1	1	1	1	0	0	0	0	0	2	2	4	0	2	1	0	0	0	0	0	0	0	0	1	1	1	0
Daldinia decipiens	GCA_022478715.1	35255283	10742	326647	Fungi	Ascomycota	Sordariomycetes	Xylariales	Hypoxylaceae	Daldinia	1	1	1	1	1	1	1	0	0	0	0	0	5	2	5	0	2	1	0	0	0	0	0	0	0	0	1	1	1	0
Daldinia grandis	GCA_022432525.1	37510053	10546	103428	Fungi	Ascomycota	Sordariomycetes	Xylariales	Hypoxylaceae	Daldinia	1	1	1	1	1	1	1	0	0	0	0	0	5	1	5	0	2	1	0	0	0	0	0	0	0	0	1	1	1	0
Debaryomyces fabryi	GCA_001447935.2	11697257	6025	58627	Fungi	Ascomycota	Saccharomycetes	Saccharomycetales	Debaryomycetaceae	Debaryomyces	0	1	1	0	0	0	0	0	0	0	0	0	0	0	0	0	0	0	1	0	1	0	0	0	0	0	1	1	1	0
Debaryomyces hansenii	GCA_000006445.2	12152486	6272	4959	Fungi	Ascomycota	Saccharomycetes	Saccharomycetales	Debaryomycetaceae	Debaryomyces	0	1	1	0	0	0	0	1	0	0	0	0	0	0	0	0	0	0	1	0	1	0	0	0	0	0	1	1	1	0
Decorospora gaudefroyi	GCA_010015605.1	30559368	11835	184978	Fungi	Ascomycota	Dothideomycetes	Pleosporales	Pleosporaceae	Decorospora	1	1	1	1	1	1	1	0	0	0	0	0	7	1	5	0	2	0	1	1	0	0	0	0	0	0	2	0	1	0
Delitschia confertaspora	GCA_010093945.1	31159062	10171	1504671	Fungi	Ascomycota	Dothideomycetes	Pleosporales	Delitschiaceae	Delitschia	1	1	1	1	1	1	1	0	0	0	0	0	1	1	3	0	1	1	1	1	0	0	0	0	0	0	1	1	1	0
Delphinella strobiligena	GCA_009982845.1	29209081	10337	147560	Fungi	Ascomycota	Dothideomycetes	Dothideales	Dothioraceae	Delphinella	1	1	1	1	1	1	1	0	0	0	0	0	3	2	0	0	1	1	1	1	0	0	0	0	0	0	2	1	1	0
Dendrothele bispora	GCA_004369135.1	130650616	33636	1314803	Fungi	Basidiomycota	Agaricomycetes	Agaricales	NA	Dendrothele	4	1	1	1	0	2	0	0	1	0	0	0	1	2	0	10	2	0	1	1	1	1	0	0	0	0	1	1	0	0
Dendryphion nanum	GCA_020744415.1	41131413	13889	256645	Fungi	Ascomycota	Dothideomycetes	Pleosporales	Torulaceae	Dendryphion	1	1	1	1	1	2	1	0	1	0	0	0	3	2	4	0	2	0	1	1	0	0	0	0	0	0	1	1	1	0
Dentipellis fragilis	GCA_004679275.1	32180624	11717	205917	Fungi	Basidiomycota	Agaricomycetes	Russulales	Hericiaceae	Dentipellis	2	1	1	1	0	2	0	1	0	0	0	0	0	2	0	0	0	0	0	0	1	1	0	0	0	0	1	1	0	0
Dentiscutata erythropus	GCA_910591965.1	293538873	28764	1348616	Fungi	Mucoromycota	Glomeromycetes	Diversisporales	Gigasporaceae	Dentiscutata	4	1	2	1	0	1	1	0	0	1	1	0	0	2	0	0	1	2	0	0	0	1	1	0	0	0	0	2	1	0
Dentiscutata heterogama	GCA_910591775.1	181573699	16277	1316150	Fungi	Mucoromycota	Glomeromycetes	Diversisporales	Gigasporaceae	Dentiscutata	1	1	2	0	0	1	1	0	0	0	0	0	0	2	0	0	1	1	0	0	0	1	1	0	0	0	0	1	0	0
Desarmillaria ectypa	GCA_030407005.1	40598130	12228	47430	Fungi	Basidiomycota	Agaricomycetes	Agaricales	NA	Desarmillaria	2	1	1	1	0	2	0	0	0	0	0	0	1	2	0	5	0	0	1	1	1	1	0	0	0	0	1	1	1	1
Diaporthe ampelina	GCA_001006365.1	47325858	10704	1214573	Fungi	Ascomycota	Sordariomycetes	Diaporthales	Diaporthaceae	Diaporthe	1	1	1	1	0	1	1	0	0	0	0	0	5	2	3	0	1	1	1	0	0	0	0	0	0	0	1	1	1	0
Diaporthe citri	GCA_014595645.1	63685968	15763	83186	Fungi	Ascomycota	Sordariomycetes	Diaporthales	Diaporthaceae	Diaporthe	1	2	1	1	1	1	1	0	0	0	0	0	8	2	7	0	3	1	1	0	0	0	0	0	0	0	1	1	1	0
Diaporthe helianthi	GCA_001702395.2	63672038	13139	158607	Fungi	Ascomycota	Sordariomycetes	Diaporthales	Diaporthaceae	Diaporthe	1	1	2	1	1	1	1	0	0	0	0	0	8	2	6	0	1	1	1	0	0	0	0	0	0	0	1	1	1	0
Dichomitus squalens	GCA_000275845.1	42748430	12287	114155	Fungi	Basidiomycota	Agaricomycetes	Polyporales	Polyporaceae	Dichomitus	2	1	1	1	1	1	0	0	0	0	0	0	3	2	0	1	1	0	1	1	1	1	0	0	0	0	1	1	1	1
Dichotomocladium elegans	GCA_025716815.1	39778020	12388	101130	Fungi	Mucoromycota	Mucoromycetes	Mucorales	Lichtheimiaceae	Dichotomocladium	1	1	2	2	1	0	1	1	1	0	0	0	0	4	0	0	0	0	1	1	1	1	1	1	0	1	1	2	1	0
Dictyocoela muelleri	GCA_016256075.1	41922160	6442	279532	Fungi	Microsporidia	NA	NA	NA	Dictyocoela	0	2	0	0	0	1	0	0	0	0	0	0	0	0	0	0	0	0	0	0	0	0	0	0	0	0	0	0	0	0
Dictyocoela roeselum	GCA_016255985.1	2205980	1201	288439	Fungi	Microsporidia	NA	NA	NA	Dictyocoela	0	1	0	0	0	0	0	0	0	0	0	0	0	0	0	0	0	0	0	0	0	0	0	0	0	0	0	0	0	0
Didymella exigua	GCA_010094145.1	34389227	12361	100019	Fungi	Ascomycota	Dothideomycetes	Pleosporales	Didymellaceae	Didymella	1	2	1	1	1	0	1	0	0	0	0	0	4	1	2	0	0	2	1	1	0	0	0	0	0	0	2	1	1	0
Didymella heteroderae	GCA_011058895.1	37069316	11640	1769908	Fungi	Ascomycota	Dothideomycetes	Pleosporales	Didymellaceae	Didymella	1	1	1	1	1	0	1	0	0	0	0	0	3	1	2	0	0	2	1	1	0	0	0	0	0	0	2	1	1	0
Didymella keratinophila	GCA_011058865.1	36217471	11880	2301244	Fungi	Ascomycota	Dothideomycetes	Pleosporales	Didymellaceae	Didymella	1	1	2	1	1	0	1	0	1	0	0	0	3	1	2	0	0	2	1	1	0	0	0	0	1	0	2	1	1	0
Didymosphaeria enalia	GCA_010094045.1	61207694	13746	85948	Fungi	Ascomycota	Dothideomycetes	Pleosporales	Didymosphaeriaceae	Didymosphaeria	1	2	1	2	0	1	2	0	0	0	0	0	2	1	3	0	1	1	1	1	0	0	0	0	0	0	1	2	1	0
Didymosphaeria variabile	GCA_027946475.1	39450705	12535	1932322	Fungi	Ascomycota	Dothideomycetes	Pleosporales	Didymosphaeriaceae	Didymosphaeria	1	1	1	1	1	0	1	0	0	0	0	0	7	1	3	0	2	1	1	0	0	0	0	0	0	0	1	2	1	0
Dimargaris cristalligena	GCA_003614675.1	30654840	7384	215637	Fungi	Zoopagomycota	Dimargaritomycetes	Dimargaritales	Dimargaritaceae	Dimargaris	2	2	1	0	1	0	1	0	0	0	0	0	0	3	0	0	0	0	1	0	0	1	0	0	0	0	0	0	1	1
Dimargaris verticillata	GCA_027576935.1	20130883	6444	2761393	Fungi	Zoopagomycota	Dimargaritomycetes	Dimargaritales	Dimargaritaceae	Dimargaris	1	1	1	1	1	0	0	0	0	0	0	0	0	3	0	0	0	0	1	0	0	1	0	0	0	0	0	0	1	1
Dimargaris xerosporica	GCA_027576955.1	25184966	7594	2761399	Fungi	Zoopagomycota	Dimargaritomycetes	Dimargaritales	Dimargaritaceae	Dimargaris	1	1	2	1	2	0	0	0	0	0	0	0	0	2	0	0	0	0	1	0	0	1	0	0	0	0	0	0	1	1
Dioszegia hungarica	GCA_025882075.1	20983778	8234	4972	Fungi	Basidiomycota	Tremellomycetes	Tremellales	Bulleribasidiaceae	Dioszegia	2	1	1	2	1	1	1	0	0	1	0	0	3	1	0	0	0	0	0	1	1	0	0	0	0	0	1	1	1	2
Diplocarpon mali	GCA_024741835.1	51728506	9663	946123	Fungi	Ascomycota	Leotiomycetes	Helotiales	Drepanopezizaceae	Diplocarpon	1	1	1	1	1	1	1	0	1	0	0	0	4	1	1	0	1	4	0	1	0	0	0	0	0	0	1	0	1	0
Diplocarpon rosae	GCA_002317995.1	67787034	13761	946125	Fungi	Ascomycota	Leotiomycetes	Helotiales	Drepanopezizaceae	Diplocarpon	2	2	2	2	2	1	2	0	1	0	0	0	4	2	2	0	1	6	0	2	0	0	0	0	0	0	2	0	2	0
Diplodia corticola	GCA_001883845.1	34986079	10839	236234	Fungi	Ascomycota	Dothideomycetes	Botryosphaeriales	Botryosphaeriaceae	Diplodia	1	1	1	1	1	1	1	1	0	0	0	0	2	1	0	0	0	2	1	1	0	0	0	0	0	0	1	1	1	0
Diplodia seriata	GCA_001006355.1	37120944	9343	420778	Fungi	Ascomycota	Dothideomycetes	Botryosphaeriales	Botryosphaeriaceae	Diplodia	1	1	1	1	0	1	1	0	0	0	0	0	1	1	0	1	0	1	0	0	0	0	0	0	0	0	1	1	1	0
Diploschistes diacapsis	GCA_023645945.1	29147108	8068	150877	Fungi	Ascomycota	Lecanoromycetes	Ostropales	Graphidaceae	Diploschistes	0	1	1	1	1	1	1	0	0	0	0	0	0	1	1	0	0	1	0	0	0	0	0	0	0	0	1	2	0	0
Dipsacomyces acuminosporus	GCA_027576915.1	15199616	6346	4866	Fungi	Zoopagomycota	Kickxellomycetes	Kickxellales	Kickxellaceae	Dipsacomyces	1	1	1	1	1	0	0	0	0	0	0	0	0	1	0	0	0	0	1	0	1	1	0	1	0	0	0	1	1	0
Dispira parvispora	GCA_027577015.1	21726176	6829	1520584	Fungi	Zoopagomycota	Dimargaritomycetes	Dimargaritales	Dimargaritaceae	Dispira	1	2	1	1	1	0	0	0	0	0	0	0	0	2	0	0	0	0	0	0	0	1	0	0	0	0	0	0	1	1
Dispira simplex	GCA_027478255.1	39371718	10752	2789359	Fungi	Zoopagomycota	Dimargaritomycetes	Dimargaritales	Dimargaritaceae	Dispira	2	4	2	2	2	0	0	0	1	0	0	0	0	5	0	0	0	0	1	0	0	2	0	0	0	0	0	0	2	1
Dissoconium aciculare	GCA_010015565.1	26537235	10293	112489	Fungi	Ascomycota	Dothideomycetes	Mycosphaerellales	Dissoconiaceae	Dissoconium	1	1	1	1	1	1	1	0	0	0	0	0	2	1	0	0	1	1	1	1	0	0	0	0	0	0	1	2	1	0
Dissophora globulifera	GCA_016097885.1	38208522	10364	979702	Fungi	Mucoromycota	Mortierellomycetes	Mortierellales	Mortierellaceae	Dissophora	1	1	1	1	0	0	1	1	0	0	0	0	1	2	0	0	0	0	1	1	1	2	0	1	0	0	1	0	2	2
Dissophora ornata	GCA_015499975.1	38407782	11261	979620	Fungi	Mucoromycota	Mortierellomycetes	Mortierellales	Mortierellaceae	Dissophora	1	1	1	1	1	0	1	0	1	0	0	0	1	2	0	0	0	0	1	1	0	2	1	2	0	0	1	1	1	2
Diutina rugosa	GCA_008704595.1	13445959	5815	5481	Fungi	Ascomycota	Saccharomycetes	Saccharomycetales	NA	Diutina	0	1	1	0	0	0	0	0	0	0	0	0	0	0	0	0	0	0	1	0	1	0	0	0	0	0	1	1	1	0
Diversispora eburnea	GCA_910592015.1	65111457	12017	1213867	Fungi	Mucoromycota	Glomeromycetes	Diversisporales	Diversisporaceae	Diversispora	4	1	2	1	0	1	1	0	0	1	1	0	0	2	0	0	0	4	0	0	0	1	0	0	0	0	0	0	1	0
Diversispora epigaea	GCA_003547095.1	156576535	28348	1348612	Fungi	Mucoromycota	Glomeromycetes	Diversisporales	Diversisporaceae	Diversispora	4	2	3	1	0	1	1	0	0	1	1	0	0	1	0	0	0	9	0	0	0	1	0	0	0	0	1	0	1	0
Dothidotthia symphoricarpi	GCA_010015815.1	34433519	11788	548649	Fungi	Ascomycota	Dothideomycetes	Pleosporales	Dothidotthiaceae	Dothidotthia	1	2	1	1	1	1	1	0	0	0	0	1	4	1	0	0	0	1	1	1	0	0	0	0	0	0	2	1	1	0
Dothistroma septosporum	GCA_000340195.1	30209431	12415	64363	Fungi	Ascomycota	Dothideomycetes	Mycosphaerellales	Mycosphaerellaceae	Dothistroma	1	1	1	1	1	1	1	0	0	0	0	0	8	1	0	0	1	2	1	1	0	0	0	0	0	0	1	0	0	0
Drechmeria coniospora	GCA_001618945.2	31878490	8721	98403	Fungi	Ascomycota	Sordariomycetes	Hypocreales	Ophiocordycipitaceae	Drechmeria	1	1	1	1	1	1	1	0	0	0	0	0	1	1	1	0	0	1	0	0	0	0	0	0	0	0	1	0	2	0
Drechslerella brochopaga	GCA_012184305.1	35431589	9793	47238	Fungi	Ascomycota	Orbiliomycetes	Orbiliales	Orbiliaceae	Drechslerella	1	0	1	1	0	0	1	1	0	0	0	0	1	1	0	0	2	0	0	0	0	0	0	0	0	0	1	0	0	0
Drechslerella dactyloides	GCA_028984885.1	39947952	9306	74499	Fungi	Ascomycota	Orbiliomycetes	Orbiliales	Orbiliaceae	Drechslerella	1	1	1	1	1	0	1	1	0	0	0	0	2	1	0	0	3	1	0	0	0	0	0	0	0	0	0	0	1	0
Drechslerella stenobrocha	GCA_000525045.1	21174508	5597	314127	Fungi	Ascomycota	Orbiliomycetes	Orbiliales	Orbiliaceae	Drechslerella	1	0	1	1	1	0	0	1	0	0	0	0	1	1	0	0	3	1	0	0	0	0	0	0	0	0	1	0	0	0
Drepanopeziza brunnea	GCA_000298775.1	51949877	10027	698440	Fungi	Ascomycota	Leotiomycetes	Helotiales	Drepanopezizaceae	Drepanopeziza	1	1	1	1	1	1	1	0	0	0	0	0	4	1	1	0	3	3	0	1	0	0	0	0	0	0	1	0	1	0
Durotheca rogersii	GCA_024521655.1	48181149	10535	419775	Fungi	Ascomycota	Sordariomycetes	Xylariales	Xylariaceae	Durotheca	1	1	1	1	1	1	1	0	0	0	0	0	5	1	2	0	2	1	0	0	0	0	0	0	0	0	1	1	1	0
Earliella scabrosa	GCA_022605405.1	51673276	17743	2478900	Fungi	Basidiomycota	Agaricomycetes	Polyporales	Polyporaceae	Earliella	2	1	1	1	1	2	0	0	1	0	0	0	3	2	0	11	2	0	1	1	1	1	0	0	0	0	1	1	0	1
Edhazardia aedis	GCA_000230595.3	51348006	4190	70536	Fungi	Microsporidia	NA	NA	Culicosporidae	Edhazardia	0	3	0	0	0	1	0	0	0	0	0	0	0	0	0	0	0	0	0	0	0	0	0	0	0	0	0	0	0	0
Elaphomyces granulatus	GCA_002240705.1	54153615	7171	519963	Fungi	Ascomycota	Eurotiomycetes	Eurotiales	Elaphomycetaceae	Elaphomyces	0	1	1	1	1	0	1	0	0	0	0	0	0	0	0	0	3	1	0	0	0	0	0	0	0	0	1	1	0	0
Elsinoe ampelina	GCA_010093995.1	28270677	10207	302913	Fungi	Ascomycota	Dothideomycetes	Myriangiales	Elsinoaceae	Elsinoe	1	1	1	1	1	1	1	1	1	0	0	0	2	1	0	0	0	1	0	1	0	0	0	0	0	0	1	1	0	0
Elsinoe australis	GCA_003013795.1	23337424	9223	40998	Fungi	Ascomycota	Dothideomycetes	Myriangiales	Elsinoaceae	Elsinoe	1	1	1	1	1	1	1	0	1	0	0	0	2	1	0	0	1	1	0	0	0	0	0	0	0	0	1	2	1	0
Emergomyces africanus	GCA_001660665.1	29708924	8769	1955775	Fungi	Ascomycota	Eurotiomycetes	Onygenales	Ajellomycetaceae	Emergomyces	1	1	1	1	1	0	1	1	0	0	0	0	2	1	0	0	0	0	0	0	0	0	0	0	0	0	2	1	1	0
Emergomyces pasteurianus	GCA_001883825.1	32410993	8950	1955774	Fungi	Ascomycota	Eurotiomycetes	Onygenales	Ajellomycetaceae	Emergomyces	1	1	1	1	1	0	1	1	0	0	0	0	3	1	0	0	0	1	0	0	0	0	0	0	0	0	1	0	1	0
Emericellopsis atlantica	GCA_019669845.1	27300990	9964	2614577	Fungi	Ascomycota	Sordariomycetes	Hypocreales	NA	Emericellopsis	1	1	1	1	1	1	1	0	0	0	0	0	3	1	1	0	0	1	1	0	0	0	0	0	0	0	1	0	1	0
Emericellopsis cladophorae	GCA_022114955.2	26937373	8523	2686198	Fungi	Ascomycota	Sordariomycetes	Hypocreales	NA	Emericellopsis	0	1	1	1	1	1	1	0	0	0	0	0	3	1	0	0	0	1	1	0	0	0	0	0	0	0	1	0	1	0
Emmonsia crescens	GCA_001008285.1	30697411	9444	73230	Fungi	Ascomycota	Eurotiomycetes	Onygenales	Ajellomycetaceae	Emmonsia	1	1	1	1	1	0	1	1	0	0	0	0	3	1	0	0	0	1	0	0	0	0	0	0	0	0	1	1	1	0
Emydomyces testavorans	GCA_029449355.1	31891002	7470	2070801	Fungi	Ascomycota	Eurotiomycetes	Onygenales	NA	Emydomyces	1	1	1	1	1	0	1	1	0	0	0	0	5	1	1	0	0	2	0	0	0	0	0	0	0	0	1	1	0	0
Encephalitozoon cuniculi	GCA_000091225.2	2497519	2126	6035	Fungi	Microsporidia	NA	NA	Unikaryonidae	Encephalitozoon	0	0	0	0	0	1	0	0	0	0	0	0	0	0	0	0	0	0	0	0	0	0	0	0	0	0	0	0	0	0
Encephalitozoon hellem	GCA_000277815.3	2251784	1928	27973	Fungi	Microsporidia	NA	NA	Unikaryonidae	Encephalitozoon	0	0	0	0	0	1	0	0	0	0	0	0	0	0	0	0	0	0	0	0	0	0	0	0	0	0	0	0	0	0
Encephalitozoon intestinalis	GCA_000146465.1	2216898	1939	58839	Fungi	Microsporidia	NA	NA	Unikaryonidae	Encephalitozoon	0	0	0	0	0	1	0	0	0	0	0	0	0	0	0	0	0	0	0	0	0	0	0	0	0	0	0	0	0	0
Endocarpon pusillum	GCA_000464535.1	37130611	9238	364733	Fungi	Ascomycota	Eurotiomycetes	Verrucariales	Verrucariaceae	Endocarpon	1	1	1	1	1	1	1	0	0	0	0	0	1	1	0	0	0	0	0	0	0	0	0	0	0	0	1	0	0	0
Enterocytozoon bieneusi	GCA_000209485.1	3860738	3632	31281	Fungi	Microsporidia	NA	NA	Enterocytozoonidae	Enterocytozoon	0	2	0	0	0	1	0	0	0	0	0	0	0	0	0	0	0	0	0	0	0	0	0	0	0	0	0	0	0	0
Enterocytozoon hepatopenaei	GCA_002081675.1	3253521	2536	646526	Fungi	Microsporidia	NA	NA	Enterocytozoonidae	Enterocytozoon	0	1	0	0	0	1	0	0	0	0	0	0	0	0	0	0	0	0	0	0	0	0	0	0	0	0	0	0	0	0
Enteropsectra breve	GCA_024243835.1	6016119	3531	1912989	Fungi	Microsporidia	NA	NA	NA	Enteropsectra	0	1	0	0	0	1	0	0	0	0	0	0	0	0	0	0	0	0	0	0	0	0	0	0	0	0	0	0	0	0
Enterospora canceri	GCA_002087915.1	3095385	2169	1081671	Fungi	Microsporidia	NA	NA	Enterocytozoonidae	Enterospora	0	1	0	0	0	1	0	0	0	0	0	0	0	0	0	0	0	0	0	0	0	0	0	0	0	0	0	0	0	0
Entomortierella beljakovae	GCA_015679585.1	37827324	11820	979673	Fungi	Mucoromycota	Mortierellomycetes	Mortierellales	Mortierellaceae	Entomortierella	1	1	1	1	1	0	1	0	1	0	0	0	1	2	0	0	0	0	0	0	1	2	0	2	0	0	1	0	1	1
Entomortierella chlamydospora	GCA_015849335.1	39048271	11098	101097	Fungi	Mucoromycota	Mortierellomycetes	Mortierellales	Mortierellaceae	Entomortierella	1	1	1	1	1	0	1	0	1	0	0	0	0	1	0	0	0	0	1	0	1	2	0	2	0	0	1	0	1	2
Entomortierella lignicola	GCA_015500005.1	35304070	10855	979712	Fungi	Mucoromycota	Mortierellomycetes	Mortierellales	Mortierellaceae	Entomortierella	1	1	1	1	1	0	1	0	1	0	0	0	0	2	0	0	0	0	2	1	1	2	0	0	0	0	1	0	1	2
Entophlyctis helioformis	GCA_025526915.1	30915201	10116	281842	Fungi	Chytridiomycota	Chytridiomycetes	Chytridiales	Chytriomycetaceae	Entophlyctis	1	1	1	1	0	0	1	1	1	0	0	0	0	4	0	0	0	0	0	0	0	1	0	0	0	0	1	2	1	0
Entophlyctis luteolus	GCA_027603655.1	25900143	9099	109932	Fungi	Chytridiomycota	Chytridiomycetes	Chytridiales	Chytriomycetaceae	Entophlyctis	0	1	1	1	0	0	1	1	0	0	0	0	0	1	1	0	0	0	0	0	0	0	1	0	0	0	0	3	1	0
Entrophospora candida	GCA_910592215.1	69898350	16088	984092	Fungi	Mucoromycota	Glomeromycetes	Glomerales	Claroideoglomeraceae	Claroideoglomus	3	1	1	2	2	3	1	0	0	0	4	0	0	2	0	0	2	3	0	0	0	1	0	0	0	0	1	1	0	0
Epichloe festucae	GCA_003814445.1	35023690	7034	35717	Fungi	Ascomycota	Sordariomycetes	Hypocreales	Clavicipitaceae	Epichloe	0	0	1	1	1	1	1	0	0	0	0	0	0	1	2	0	1	1	0	0	0	0	0	0	0	0	1	2	1	0
Epicoccum nigrum	GCA_002116315.1	34744152	12025	105696	Fungi	Ascomycota	Dothideomycetes	Pleosporales	Didymellaceae	Epicoccum	1	1	1	1	1	0	1	0	1	0	0	0	3	1	2	0	0	2	1	1	0	0	0	0	0	0	2	0	1	0
Epithele typhae	GCA_022376455.1	56143418	13762	378194	Fungi	Basidiomycota	Agaricomycetes	Polyporales	Epitheliaceae	Epithele	2	1	1	1	0	1	0	0	0	0	0	0	1	2	0	1	1	0	1	1	2	1	0	0	0	0	1	1	1	2
Eremomyces bilateralis	GCA_010015585.1	26864015	9878	1341166	Fungi	Ascomycota	Dothideomycetes	Eremomycetales	Eremomycetaceae	Eremomyces	1	1	1	1	1	0	1	0	0	0	0	0	2	2	1	0	1	1	1	1	0	0	0	0	0	0	1	1	1	0
Eremothecium cymbalariae	GCA_000235365.1	9669424	4434	45285	Fungi	Ascomycota	Saccharomycetes	Saccharomycetales	Saccharomycetaceae	Eremothecium	0	1	1	0	1	0	0	0	0	0	0	0	0	0	0	0	0	0	1	0	1	0	0	0	0	0	1	1	0	1
Eremothecium gossypii	GCA_000091025.4	9119312	4776	33169	Fungi	Ascomycota	Saccharomycetes	Saccharomycetales	Saccharomycetaceae	Eremothecium	0	1	1	0	1	0	0	0	0	0	0	0	0	0	0	0	0	0	1	0	1	0	0	0	0	0	1	2	0	1
Erysiphe necator	GCA_000798715.1	52505057	6484	52586	Fungi	Ascomycota	Leotiomycetes	Erysiphales	Erysiphaceae	Erysiphe	1	1	1	1	1	0	1	0	0	0	0	0	1	0	0	0	0	1	0	1	0	0	0	0	0	0	0	0	1	0
Erysiphe neolycopersici	GCA_003610855.1	41983253	6851	212602	Fungi	Ascomycota	Leotiomycetes	Erysiphales	Erysiphaceae	Erysiphe	1	1	1	1	1	0	1	0	0	0	0	0	1	1	0	0	0	1	0	0	0	0	0	0	0	0	0	0	1	0
Erysiphe pulchra	GCA_002918395.1	63509586	6859	225359	Fungi	Ascomycota	Leotiomycetes	Erysiphales	Erysiphaceae	Erysiphe	1	1	1	1	1	0	1	0	0	0	0	0	1	1	0	0	0	1	0	1	0	0	0	0	0	0	0	0	1	0
Escovopsis weberi	GCA_001278495.1	27200907	6870	150374	Fungi	Ascomycota	Sordariomycetes	Hypocreales	Hypocreaceae	Escovopsis	1	1	1	1	1	1	1	0	0	0	0	0	2	1	0	0	0	0	0	0	0	0	0	0	0	0	1	0	2	0
Eutypa lata	GCA_000349385.1	54005819	11685	97096	Fungi	Ascomycota	Sordariomycetes	Xylariales	Diatrypaceae	Eutypa	1	1	1	1	0	1	1	0	0	0	0	0	6	3	2	0	1	0	0	0	0	0	0	0	0	0	1	1	1	0
Exidia glandulosa	GCA_001632375.1	78161169	26682	5219	Fungi	Basidiomycota	Agaricomycetes	Auriculariales	Exidiaceae	Exidia	6	1	1	1	0	3	0	0	0	0	0	0	4	5	0	8	2	0	2	1	1	1	0	0	0	0	1	1	1	0
Exobasidium rhododendri	GCA_026210745.1	17647348	6977	63378	Fungi	Basidiomycota	Exobasidiomycetes	Exobasidiales	Exobasidiaceae	Exobasidium	1	1	1	1	1	0	1	0	0	0	0	0	0	1	0	0	1	0	0	1	1	0	0	0	0	0	1	1	0	0
Exophiala aquamarina	GCA_000709125.1	41566958	13118	1033840	Fungi	Ascomycota	Eurotiomycetes	Chaetothyriales	Herpotrichiellaceae	Exophiala	1	1	1	1	1	1	1	0	0	0	0	0	1	1	3	0	1	2	1	1	0	0	0	0	0	0	1	1	1	0
Exophiala dermatitidis	GCA_000230625.1	26376767	9285	5970	Fungi	Ascomycota	Eurotiomycetes	Chaetothyriales	Herpotrichiellaceae	Exophiala	1	1	1	1	1	0	1	0	0	0	0	0	2	1	1	0	0	0	0	1	0	0	0	0	0	0	1	2	1	0
Exophiala sideris	GCA_000835395.1	29505589	10191	1016849	Fungi	Ascomycota	Eurotiomycetes	Chaetothyriales	Herpotrichiellaceae	Exophiala	1	1	1	1	1	1	1	0	0	0	0	0	1	1	1	0	0	1	1	1	0	0	0	0	0	0	1	0	1	0
Exserohilum turcica	GCA_000359705.1	43013545	11698	93612	Fungi	Ascomycota	Dothideomycetes	Pleosporales	Pleosporaceae	Exserohilum	1	1	1	1	1	1	1	0	0	0	0	0	2	1	3	0	1	1	1	0	0	0	0	0	0	0	2	2	1	0
Fibroporia radiculosa	GCA_000313525.1	28378039	9262	599839	Fungi	Basidiomycota	Agaricomycetes	Polyporales	NA	Fibroporia	1	0	1	1	1	1	0	0	0	0	0	0	1	2	0	2	1	0	0	1	0	1	0	0	0	0	1	1	0	1
Filobasidium floriforme	GCA_019201745.1	26438809	7227	5210	Fungi	Basidiomycota	Tremellomycetes	Filobasidiales	Filobasidiaceae	Filobasidium	0	1	1	1	1	0	0	0	0	1	0	0	1	1	0	0	2	0	1	1	0	0	0	0	0	0	1	1	1	1
Fimicolochytrium jonesii	GCA_025526975.1	30619153	10067	1396493	Fungi	Chytridiomycota	Chytridiomycetes	Spizellomycetales	Powellomycetaceae	Fimicolochytrium	1	1	1	1	0	1	1	2	2	1	0	0	0	3	0	0	0	0	2	0	0	1	0	0	0	0	0	1	1	1
Fistulina hepatica	GCA_000934395.1	33847808	11244	40457	Fungi	Basidiomycota	Agaricomycetes	Agaricales	Fistulinaceae	Fistulina	2	1	1	1	0	2	0	0	0	0	0	0	0	2	0	6	0	0	1	1	0	1	0	0	0	0	1	0	1	1
Flammula alnicola	GCA_015499995.1	75008219	18793	109635	Fungi	Basidiomycota	Agaricomycetes	Agaricales	Strophariaceae	Flammula	3	1	1	4	3	5	0	1	0	0	0	0	2	3	0	8	0	0	2	1	1	1	0	0	0	0	1	1	0	0
Flavoplaca oasis	GCA_023646635.1	33600987	8910	1301336	Fungi	Ascomycota	Lecanoromycetes	Teloschistales	Teloschistaceae	Flavoplaca	1	1	1	1	1	0	1	0	0	0	0	0	3	1	0	0	1	1	0	0	0	0	0	0	0	0	0	0	0	0
Fomes fomentarius	GCA_022606135.1	40950972	14754	40442	Fungi	Basidiomycota	Agaricomycetes	Polyporales	Polyporaceae	Fomes	2	1	1	1	1	2	0	0	1	0	0	0	3	2	0	4	1	0	1	1	1	1	0	0	0	0	1	1	1	0
Fomitiporia mediterranea	GCA_000271605.1	63354419	11338	208960	Fungi	Basidiomycota	Agaricomycetes	Hymenochaetales	Hymenochaetaceae	Fomitiporia	2	0	1	1	1	1	0	0	1	0	0	0	1	2	1	3	1	0	0	1	1	1	0	0	0	0	1	0	1	0
Fomitopsis betulina	GCA_022606075.1	42863829	12070	40450	Fungi	Basidiomycota	Agaricomycetes	Polyporales	Fomitopsidaceae	Fomitopsis	2	1	1	1	0	1	0	0	0	0	0	0	3	3	0	1	2	0	1	1	1	1	0	0	0	0	1	1	1	2
Fomitopsis schrenkii	GCA_000344655.2	41614358	13851	2126942	Fungi	Basidiomycota	Agaricomycetes	Polyporales	Fomitopsidaceae	Fomitopsis	2	1	1	1	1	1	0	0	0	0	0	0	2	2	0	0	2	0	1	1	1	1	0	0	0	0	1	1	0	0
Fonsecaea monophora	GCA_001642475.1	35229797	11984	254056	Fungi	Ascomycota	Eurotiomycetes	Chaetothyriales	Herpotrichiellaceae	Fonsecaea	1	2	2	1	1	1	1	0	0	0	0	0	1	2	3	0	0	0	0	1	0	0	0	0	0	0	1	1	1	0
Fonsecaea multimorphosa	GCA_000836435.1	33447075	12369	979981	Fungi	Ascomycota	Eurotiomycetes	Chaetothyriales	Herpotrichiellaceae	Fonsecaea	1	1	1	1	1	1	1	0	0	0	0	1	1	2	1	0	1	1	0	1	0	0	0	0	0	0	1	0	1	0
Fonsecaea pedrosoi	GCA_000835455.1	34688880	12527	40355	Fungi	Ascomycota	Eurotiomycetes	Chaetothyriales	Herpotrichiellaceae	Fonsecaea	1	1	2	1	1	1	1	0	0	0	0	1	1	2	3	0	1	0	0	1	0	0	0	0	0	0	1	1	1	0
Friedmanniomyces endolithicus	GCA_005059855.1	46752167	18027	329885	Fungi	Ascomycota	Dothideomycetes	Mycosphaerellales	Teratosphaeriaceae	Friedmanniomyces	2	2	2	2	2	1	2	0	0	0	0	0	4	0	0	0	4	4	1	2	0	0	0	0	0	0	2	0	2	0
Friedmanniomyces simplex	GCA_005059865.1	37790643	13766	329884	Fungi	Ascomycota	Dothideomycetes	Mycosphaerellales	Teratosphaeriaceae	Friedmanniomyces	3	1	1	2	1	2	2	0	0	0	0	0	5	0	0	1	2	2	2	1	0	0	0	0	0	0	2	1	1	0
Fulvia fulva	GCA_020509005.2	67169167	14690	5499	Fungi	Ascomycota	Dothideomycetes	Mycosphaerellales	Mycosphaerellaceae	Fulvia	1	1	1	1	1	0	1	0	0	0	0	0	12	2	0	0	2	2	1	1	0	0	0	0	0	0	1	0	1	0
Funneliformis caledonium	GCA_910591825.1	146162978	17946	1117310	Fungi	Mucoromycota	Glomeromycetes	Glomerales	Glomeraceae	Funneliformis	2	1	2	1	1	1	1	0	0	1	1	0	0	2	0	0	1	0	0	0	1	1	0	0	0	0	1	1	1	0
Funneliformis geosporum	GCA_946474995.1	134268643	20094	1117311	Fungi	Mucoromycota	Glomeromycetes	Glomerales	Glomeraceae	Funneliformis	2	1	1	1	1	1	1	0	0	1	1	0	0	2	0	0	1	1	0	0	1	1	0	0	0	0	1	1	1	0
Funneliformis mosseae	GCA_910592005.1	145719962	16857	27381	Fungi	Mucoromycota	Glomeromycetes	Glomerales	Glomeraceae	Funneliformis	2	2	1	1	1	1	1	0	0	0	1	0	0	2	0	0	2	0	0	0	1	1	0	0	0	0	1	1	1	0
Furculomyces boomerangus	GCA_003086725.1	28123040	7338	61424	Fungi	Zoopagomycota	Harpellomycetes	Harpellales	Harpellaceae	Furculomyces	2	1	1	0	0	0	0	0	0	0	0	0	0	2	0	0	0	0	0	1	0	0	0	0	0	0	0	1	0	0
Fusarium graminearum	GCA_000240135.3	36565771	14143	229533	Fungi	Ascomycota	Sordariomycetes	Hypocreales	Nectriaceae	Fusarium	1	1	1	1	1	1	1	0	0	0	0	0	4	1	0	0	3	1	1	0	0	0	0	0	0	0	1	0	1	0
Fusarium oxysporum	GCA_000149955.2	61471697	20925	5507	Fungi	Ascomycota	Sordariomycetes	Hypocreales	Nectriaceae	Fusarium	1	1	1	1	1	2	1	1	0	0	0	0	3	1	0	0	1	1	1	0	0	0	0	0	0	0	1	0	3	0
Fusarium vanettenii	GCA_000151355.1	51286497	15708	2747968	Fungi	Ascomycota	Sordariomycetes	Hypocreales	Nectriaceae	Fusarium	1	1	1	1	1	1	2	0	0	0	0	0	4	1	0	0	2	1	1	0	0	0	0	0	0	0	1	1	1	0
Fusarium verticillioides	GCA_000149555.1	41885085	15869	117187	Fungi	Ascomycota	Sordariomycetes	Hypocreales	Nectriaceae	Fusarium	1	1	1	1	1	0	1	0	0	0	0	0	3	1	1	0	2	1	1	0	0	0	0	0	0	0	1	0	1	0
Gaertneriomyces semiglobifer	GCA_025558075.1	20918219	8713	109897	Fungi	Chytridiomycota	Chytridiomycetes	Spizellomycetales	Spizellomycetaceae	Gaertneriomyces	0	1	1	1	0	0	1	1	0	0	0	0	1	4	0	0	1	0	2	0	0	1	0	0	0	0	0	2	1	1
Gaeumannomyces tritici	GCA_000145635.1	43768664	14458	36779	Fungi	Ascomycota	Sordariomycetes	Magnaporthales	Magnaporthaceae	Gaeumannomyces	1	1	1	1	1	1	1	0	0	0	0	0	6	1	8	0	1	0	0	0	0	0	0	0	0	0	1	1	2	0
Galactomyces reessii	GCA_013305925.1	23394681	3063	43985	Fungi	Ascomycota	Saccharomycetes	Saccharomycetales	Dipodascaceae	Galactomyces	0	1	0	0	0	0	0	0	0	0	0	0	0	0	0	0	0	0	0	0	0	0	0	0	0	0	1	1	0	0
Galerina marginata	GCA_000697645.1	59418196	21390	109633	Fungi	Basidiomycota	Agaricomycetes	Agaricales	Strophariaceae	Galerina	2	1	1	12	1	2	0	1	0	0	0	0	2	2	0	12	0	0	1	0	1	1	0	0	0	0	1	1	0	0
Gamsiella multidivaricata	GCA_016098015.1	36027825	10546	101098	Fungi	Mucoromycota	Mortierellomycetes	Mortierellales	Mortierellaceae	Gamsiella	1	1	1	1	1	0	1	0	1	0	0	0	0	2	0	0	0	0	1	0	1	2	1	2	0	0	1	1	1	1
Ganoderma leucocontextum	GCA_022813035.1	60339699	16950	1566825	Fungi	Basidiomycota	Agaricomycetes	Polyporales	Polyporaceae	Ganoderma	2	1	1	1	4	2	0	0	1	0	0	0	2	2	0	1	1	0	1	1	1	1	0	0	0	0	1	1	1	0
Ganoderma sinense	GCA_002760635.1	48955697	15478	36075	Fungi	Basidiomycota	Agaricomycetes	Polyporales	Polyporaceae	Ganoderma	1	1	1	1	0	1	0	0	0	0	0	0	2	2	0	1	1	0	0	1	1	1	0	0	0	0	1	0	0	0
Gautieria morchelliformis	GCA_015179125.1	122807766	20325	112417	Fungi	Basidiomycota	Agaricomycetes	Gomphales	Gautieriaceae	Gautieria	2	1	1	2	0	1	0	0	0	0	0	0	2	1	0	1	0	0	0	1	0	1	0	0	0	0	1	0	0	0
Gelatoporia subvermispora	GCA_000320605.2	38969650	12122	42742	Fungi	Basidiomycota	Agaricomycetes	Polyporales	Gelatoporiaceae	Gelatoporia	2	0	1	0	1	0	0	0	1	0	0	0	2	2	0	11	1	0	1	1	1	1	0	0	0	0	1	1	1	0
Geoglossum simile	GCA_026023525.1	31357289	9133	1086352	Fungi	Ascomycota	Geoglossomycetes	Geoglossales	Geoglossaceae	Geoglossum	1	1	1	1	1	1	1	0	0	0	0	0	2	0	0	0	1	1	0	1	0	0	0	0	0	0	1	0	0	0
Geoglossum umbratile	GCA_026024515.1	33879389	9544	315204	Fungi	Ascomycota	Geoglossomycetes	Geoglossales	Geoglossaceae	Geoglossum	1	1	1	1	1	1	1	0	0	0	0	0	2	1	0	0	0	1	0	1	0	0	0	0	0	0	1	0	0	0
Geopyxis carbonaria	GCA_024516215.1	49454325	11663	49969	Fungi	Ascomycota	Pezizomycetes	Pezizales	Pyronemataceae	Geopyxis	1	1	1	1	0	1	1	0	0	0	0	0	3	1	0	0	2	0	0	1	0	0	0	0	0	0	1	1	1	0
Geosiphon pyriformis	GCA_016748015.1	128319586	23936	50956	Fungi	Mucoromycota	Glomeromycetes	Archaeosporales	Geosiphonaceae	Geosiphon	2	2	0	1	1	1	1	0	0	1	2	0	0	1	0	0	0	2	0	0	0	1	0	0	0	0	1	0	0	0
Geosmithia morbida	GCA_012550715.1	26543684	7812	1094350	Fungi	Ascomycota	Sordariomycetes	Hypocreales	Bionectriaceae	Geosmithia	1	1	1	1	1	1	1	0	0	0	0	0	0	1	0	0	0	1	1	0	0	0	0	0	0	0	1	0	2	0
Geotrichum candidum	GCA_001402995.1	24836057	6799	1173061	Fungi	Ascomycota	Saccharomycetes	Saccharomycetales	Dipodascaceae	Geotrichum	0	0	1	1	1	0	2	0	1	0	0	0	0	0	0	0	0	0	1	0	1	0	0	0	0	0	1	1	1	1
Geranomyces variabilis	GCA_025399175.1	23695997	9406	109894	Fungi	Chytridiomycota	Chytridiomycetes	Spizellomycetales	Powellomycetaceae	Geranomyces	1	1	2	1	0	0	1	1	0	1	0	0	1	3	0	0	1	0	2	0	1	0	0	0	0	0	0	1	1	1
Gigaspora margarita	GCA_009809945.1	773098546	26134	4874	Fungi	Mucoromycota	Glomeromycetes	Diversisporales	Gigasporaceae	Gigaspora	3	1	2	1	0	1	1	0	1	1	2	0	0	2	0	0	1	0	0	0	0	0	1	0	0	0	0	2	1	0
Gigaspora rosea	GCA_003550325.1	567860885	31243	44941	Fungi	Mucoromycota	Glomeromycetes	Diversisporales	Gigasporaceae	Gigaspora	3	1	2	1	0	1	1	0	0	1	2	0	0	2	0	0	1	0	0	0	0	0	1	0	0	0	0	2	1	0
Gilbertella persicaria	GCA_025201335.1	25732466	10988	101096	Fungi	Mucoromycota	Mucoromycetes	Mucorales	Choanephoraceae	Gilbertella	0	2	2	2	2	0	1	2	1	0	0	0	0	3	0	0	0	0	1	0	1	2	0	0	0	1	1	1	1	0
Glarea lozoyensis	GCA_000238015.2	38718320	7926	101852	Fungi	Ascomycota	Leotiomycetes	Helotiales	Helotiaceae	Glarea	0	1	1	0	0	1	1	0	0	0	0	0	1	1	1	0	2	0	0	0	0	0	0	0	0	0	1	0	0	0
Globomyces pollinis-pini	GCA_025399215.1	21646612	11534	382532	Fungi	Chytridiomycota	Chytridiomycetes	Rhizophydiales	Globomycetaceae	Globomyces	2	1	1	1	0	0	1	0	3	0	4	0	0	3	0	0	1	0	1	0	0	0	0	1	0	0	0	4	0	1
Gloeopeniophorella convolvens	GCA_022496205.1	37988413	12899	205761	Fungi	Basidiomycota	Agaricomycetes	Russulales	NA	Gloeopeniophorella	2	1	1	1	1	1	0	1	1	0	0	0	1	2	0	2	0	0	0	1	1	1	0	0	0	0	1	1	1	0
Gloeophyllum trabeum	GCA_000344685.1	37178225	11755	104355	Fungi	Basidiomycota	Agaricomycetes	Gloeophyllales	Gloeophyllaceae	Gloeophyllum	1	1	1	1	0	1	0	0	0	0	0	0	1	2	0	0	0	0	1	1	1	1	0	0	0	0	1	1	0	0
Glomus cerebriforme	GCA_003550305.1	136820789	21154	658196	Fungi	Mucoromycota	Glomeromycetes	Glomerales	Glomeraceae	Glomus	2	1	1	1	1	1	2	0	0	1	1	0	0	1	0	0	4	2	0	0	0	1	1	0	0	0	1	2	1	0
Glonium stellatum	GCA_001692915.1	40521621	14277	574774	Fungi	Ascomycota	Dothideomycetes	NA	Gloniaceae	Glonium	1	1	1	1	0	1	1	0	0	0	0	0	5	1	1	0	3	1	1	1	0	0	0	0	0	0	1	1	1	0
Glutinoglossum americanum	GCA_020080175.1	26395934	7646	1670608	Fungi	Ascomycota	Geoglossomycetes	Geoglossales	Geoglossaceae	Glutinoglossum	1	1	1	1	1	1	1	0	0	0	0	0	0	1	0	0	0	1	0	1	0	0	0	0	0	0	1	0	0	0
Gnomoniopsis smithogilvyi	GCA_027946515.1	35292834	10250	1191159	Fungi	Ascomycota	Sordariomycetes	Diaporthales	Gnomoniaceae	Gnomoniopsis	1	1	1	1	0	1	1	0	0	0	0	0	6	3	6	0	0	1	1	0	0	0	0	0	0	0	1	0	1	0
Golovinomyces cichoracearum	GCA_003611195.1	56923012	6761	62708	Fungi	Ascomycota	Leotiomycetes	Erysiphales	Erysiphaceae	Golovinomyces	1	1	1	1	1	0	0	0	0	0	0	0	2	1	0	0	0	1	0	0	0	0	0	0	0	0	0	0	1	0
Gomphillus americanus	GCA_905337335.1	23861785	8300	1940652	Fungi	Ascomycota	Lecanoromycetes	Ostropales	Graphidaceae	Gomphillus	1	1	1	1	1	1	1	0	0	0	0	0	0	1	1	0	1	1	0	1	0	0	0	0	0	0	1	2	1	0
Gonapodya prolifera	GCA_001574975.1	48794828	13827	1123529	Fungi	Chytridiomycota	Monoblepharidomycetes	Monoblepharidales	Gonapodyaceae	Gonapodya	1	1	1	1	0	0	1	1	0	1	0	0	0	3	0	0	0	0	2	0	0	1	0	1	0	0	0	4	1	0
Gongronella butleri	GCA_025201375.1	33012461	11000	101105	Fungi	Mucoromycota	Mucoromycetes	Mucorales	Cunninghamellaceae	Gongronella	1	2	1	2	1	0	1	2	1	0	0	0	0	3	0	0	0	0	1	1	1	1	0	0	0	1	1	1	1	0
Gorgonomyces haynaldii	GCA_025526955.1	13983420	7898	382530	Fungi	Chytridiomycota	Chytridiomycetes	Rhizophydiales	Gorgonomycetaceae	Gorgonomyces	0	1	1	1	1	1	1	2	2	0	4	0	0	2	0	0	0	0	1	0	0	0	0	0	0	0	0	4	1	1
Grifola frondosa	GCA_001683735.1	39289314	15039	5627	Fungi	Basidiomycota	Agaricomycetes	Polyporales	Grifolaceae	Grifola	2	1	1	1	0	2	0	0	0	0	0	0	1	2	0	1	3	0	0	1	1	1	0	0	0	0	1	0	0	0
Grosmannia clavigera	GCA_000143105.2	29794006	8312	226899	Fungi	Ascomycota	Sordariomycetes	Ophiostomatales	Ophiostomataceae	Grosmannia	1	1	1	1	0	1	1	0	0	0	0	0	3	1	1	0	0	1	0	0	0	0	0	0	0	0	1	1	1	0
Gryganskiella cystojenkinii	GCA_015852425.1	42943035	12079	979690	Fungi	Mucoromycota	Mortierellomycetes	Mortierellales	Mortierellaceae	Gryganskiella	1	1	1	1	1	0	1	0	0	0	0	0	0	2	0	0	0	0	2	1	1	1	1	1	0	0	1	1	1	0
Guyanagaster necrorhizus	GCA_019112545.1	53686691	14267	856835	Fungi	Basidiomycota	Agaricomycetes	Agaricales	Physalacriaceae	Guyanagaster	2	1	1	1	1	3	0	1	0	0	0	0	2	2	0	6	0	0	0	1	1	1	0	0	0	0	1	1	0	0
Gyalolechia ehrenbergii	GCA_023646125.1	39667341	8050	1301418	Fungi	Ascomycota	Lecanoromycetes	Teloschistales	Teloschistaceae	Gyalolechia	1	1	1	1	1	0	1	1	0	0	0	0	0	1	0	0	0	0	0	0	0	0	0	0	0	0	0	0	0	0
Gymnopilus dilepis	GCA_002938385.1	46664762	16222	231916	Fungi	Basidiomycota	Agaricomycetes	Agaricales	Hymenogastraceae	Gymnopilus	2	1	1	1	1	2	0	1	0	0	0	0	1	2	0	11	0	0	1	1	1	1	0	0	0	0	1	1	0	0
Gymnopilus junonius	GCA_015501075.1	59461163	16442	109634	Fungi	Basidiomycota	Agaricomycetes	Agaricales	Hymenogastraceae	Gymnopilus	2	1	1	2	1	2	0	1	0	0	0	0	1	3	0	11	0	0	1	1	1	1	0	0	0	0	1	1	0	0
Gymnopus androsaceus	GCA_009733575.1	89149538	29370	1447940	Fungi	Basidiomycota	Agaricomycetes	Agaricales	Omphalotaceae	Gymnopus	2	1	1	1	0	2	0	0	1	0	0	0	3	3	0	8	0	0	1	1	1	1	0	0	0	0	1	1	1	0
Gyrodon lividus	GCA_014904945.1	43048674	11769	85971	Fungi	Basidiomycota	Agaricomycetes	Boletales	Gyrodontaceae	Gyrodon	2	1	1	1	0	2	0	0	0	0	0	0	0	2	0	0	0	0	1	0	1	1	0	0	0	0	1	0	0	0
Halenospora varia	GCA_020726485.1	55609683	17757	394676	Fungi	Ascomycota	Leotiomycetes	Helotiales	Tricladiaceae	Halenospora	1	1	1	2	0	1	2	0	0	0	0	0	10	4	5	0	2	2	0	1	0	0	0	0	0	0	1	0	2	0
Halteromyces radiatus	GCA_025201355.1	26215609	10174	101107	Fungi	Mucoromycota	Mucoromycetes	Mucorales	Cunninghamellaceae	Halteromyces	1	2	1	2	2	0	1	1	1	0	0	0	0	4	0	0	0	0	1	1	1	2	1	0	0	1	1	1	1	1
Hamiltosporidium magnivora	GCA_004325035.1	17189839	4180	148818	Fungi	Microsporidia	NA	NA	Dubosqiidae	Hamiltosporidium	0	2	0	0	1	1	0	0	0	0	0	0	0	0	0	0	0	0	0	0	0	0	0	0	0	0	0	0	0	0
Hamiltosporidium tvaerminnensis	GCA_004325045.1	18344352	4121	1176355	Fungi	Microsporidia	NA	NA	Dubosqiidae	Hamiltosporidium	0	3	0	0	1	1	0	0	0	0	0	0	0	0	0	0	0	0	0	0	0	0	0	0	0	0	0	0	0	0
Hanseniaspora osmophila	GCA_001747045.1	11458415	4657	56408	Fungi	Ascomycota	Saccharomycetes	Saccharomycetales	Saccharomycodaceae	Hanseniaspora	0	1	1	0	1	0	0	0	0	0	0	0	0	0	0	0	0	0	1	0	0	0	0	0	0	0	1	2	0	1
Hanseniaspora uvarum	GCA_000968475.1	9503661	3043	29833	Fungi	Ascomycota	Saccharomycetes	Saccharomycetales	Saccharomycodaceae	Hanseniaspora	0	1	0	0	1	0	0	0	0	0	0	0	0	0	0	0	0	0	0	0	0	0	0	0	0	0	0	0	0	1
Hanseniaspora valbyensis	GCA_001664025.1	11464036	4772	53685	Fungi	Ascomycota	Saccharomycetes	Saccharomycetales	Saccharomycodaceae	Hanseniaspora	0	1	0	0	1	0	0	0	0	0	0	0	0	0	0	0	0	0	0	0	0	0	0	0	0	0	1	0	0	1
Haplosporangium bisporale	GCA_015500155.1	38988710	13339	1897645	Fungi	Mucoromycota	Mortierellomycetes	Mortierellales	Mortierellaceae	Haplosporangium	1	1	2	1	1	0	2	1	0	0	0	0	0	1	0	0	1	0	2	1	0	1	1	2	0	0	1	0	1	2
Haplosporangium gracile	GCA_015499985.1	44900159	11813	2779863	Fungi	Mucoromycota	Mortierellomycetes	Mortierellales	Mortierellaceae	Haplosporangium	1	1	2	1	1	0	1	2	0	0	0	0	1	2	0	0	0	0	2	1	1	2	1	1	0	0	1	1	1	2
Hapsidospora chrysogenum	GCA_000769265.1	28590524	8901	5044	Fungi	Ascomycota	Sordariomycetes	Hypocreales	NA	Acremonium	1	1	1	1	1	1	1	0	0	0	0	0	1	1	0	0	0	1	1	0	0	0	0	0	0	0	1	0	2	0
Hebeloma cylindrosporum	GCA_000827355.1	38226047	15373	76867	Fungi	Basidiomycota	Agaricomycetes	Agaricales	Hymenogastraceae	Hebeloma	2	1	1	1	1	2	0	1	0	0	0	0	3	2	0	9	0	0	0	1	1	1	0	0	0	0	1	0	1	0
Helicocarpus griseus	GCA_002573585.1	32035056	10224	121128	Fungi	Ascomycota	Eurotiomycetes	Onygenales	Ajellomycetaceae	Helicocarpus	1	1	1	1	1	0	1	1	0	0	0	0	2	1	0	0	1	1	0	0	0	0	0	0	0	0	1	0	2	0
Helicostylum pulchrum	GCA_025677825.1	32727348	12793	562976	Fungi	Mucoromycota	Mucoromycetes	Mucorales	Mucoraceae	Helicostylum	1	2	2	2	2	0	1	1	1	0	0	0	0	4	0	0	0	0	1	1	1	1	0	0	0	1	1	2	1	1
Heliocybe sulcata	GCA_004369045.1	31948515	12569	5364	Fungi	Basidiomycota	Agaricomycetes	Gloeophyllales	NA	Heliocybe	2	1	1	1	0	2	0	0	0	0	0	0	1	2	0	0	0	0	1	1	1	1	0	0	0	0	1	1	0	0
Hepatospora eriocheir	GCA_002087875.1	4834792	3052	1081669	Fungi	Microsporidia	NA	NA	Enterocytozoonidae	Hepatospora	0	1	0	0	0	1	0	0	0	0	0	0	0	0	0	0	0	0	0	0	0	0	0	0	0	0	0	0	0	0
Hericium alpestre	GCA_004681135.1	37532302	11007	135208	Fungi	Basidiomycota	Agaricomycetes	Russulales	Hericiaceae	Hericium	2	1	1	1	1	1	0	1	0	0	0	0	0	1	0	14	0	0	0	1	0	1	0	0	0	0	1	1	0	0
Hermanssonia centrifuga	GCA_001913855.2	34612349	13684	98765	Fungi	Basidiomycota	Agaricomycetes	Polyporales	Meruliaceae	Hermanssonia	0	1	1	1	1	1	0	0	0	0	0	0	3	0	0	1	0	0	1	1	1	1	0	0	0	0	1	0	0	0
Hesseltinella vesiculosa	GCA_002104935.1	27216191	11139	101127	Fungi	Mucoromycota	Mucoromycetes	Mucorales	Cunninghamellaceae	Hesseltinella	1	2	1	2	1	0	1	2	1	0	0	0	0	3	0	0	0	0	1	1	1	0	1	0	0	1	1	1	1	0
Heterobasidion irregulare	GCA_000320585.2	33649967	13271	984962	Fungi	Basidiomycota	Agaricomycetes	Russulales	Bondarzewiaceae	Heterobasidion	2	1	1	1	1	1	0	1	0	0	0	0	1	2	0	4	0	0	0	1	1	1	0	0	0	0	1	0	0	0
Heterodermia speciosa	GCA_905337345.1	38736376	10570	116794	Fungi	Ascomycota	Lecanoromycetes	Caliciales	Physciaceae	Heterodermia	1	1	1	1	1	0	1	0	0	0	0	0	1	1	0	0	0	3	0	0	0	0	0	0	0	0	1	1	1	0
Hirsutella minnesotensis	GCA_000956045.1	51111088	12700	332947	Fungi	Ascomycota	Sordariomycetes	Hypocreales	Ophiocordycipitaceae	Hirsutella	1	1	1	1	1	1	1	0	0	0	0	0	1	1	1	0	1	1	0	0	0	0	0	0	0	0	1	1	1	0
Hirsutella rhossiliensis	GCA_020360975.1	81812248	12057	111463	Fungi	Ascomycota	Sordariomycetes	Hypocreales	Ophiocordycipitaceae	Hirsutella	1	1	1	1	1	1	1	0	0	0	0	0	1	1	3	0	1	1	0	0	0	0	0	0	0	0	1	1	2	0
Histoplasma capsulatum	GCA_000150115.1	30483324	9254	5037	Fungi	Ascomycota	Eurotiomycetes	Onygenales	Ajellomycetaceae	Histoplasma	1	1	1	1	1	0	1	1	0	0	0	0	2	1	0	0	0	1	0	0	0	0	0	0	0	0	1	1	1	0
Histoplasma mississippiense	GCA_000149585.1	33030326	9313	2059318	Fungi	Ascomycota	Eurotiomycetes	Onygenales	Ajellomycetaceae	Histoplasma	1	1	0	1	1	0	1	1	0	0	0	0	1	0	0	0	0	0	0	0	0	0	0	0	0	0	1	0	0	0
Hortaea werneckii	GCA_002127715.1	49777326	15620	91943	Fungi	Ascomycota	Dothideomycetes	Mycosphaerellales	Teratosphaeriaceae	Hortaea	2	2	2	2	0	2	2	0	0	0	0	0	9	2	0	0	1	4	2	2	0	0	0	0	0	0	2	0	2	0
Hyaloraphidium curvatum	GCA_025558095.1	31926619	15173	82268	Fungi	Chytridiomycota	Monoblepharidomycetes	Monoblepharidales	NA	Hyaloraphidium	1	1	1	1	0	0	1	0	1	1	2	0	1	3	1	0	0	0	2	0	0	2	0	1	0	1	1	4	3	0
Hyaloscypha bicolor	GCA_002865645.1	82384847	18611	2482752	Fungi	Ascomycota	Leotiomycetes	Helotiales	Hyaloscyphaceae	Hyaloscypha	1	1	1	3	1	1	2	0	1	0	0	0	12	3	2	0	3	3	0	0	0	0	0	0	1	0	1	1	1	0
Hyaloscypha hepaticicola	GCA_002865625.1	57408471	16783	2082293	Fungi	Ascomycota	Leotiomycetes	Helotiales	Hyaloscyphaceae	Hyaloscypha	1	1	1	1	0	1	1	0	1	0	0	0	7	2	3	0	1	3	0	1	0	0	0	0	1	0	1	0	1	0
Hyaloscypha variabilis	GCA_002865655.1	55857776	20379	2482757	Fungi	Ascomycota	Leotiomycetes	Helotiales	Hyaloscyphaceae	Hyaloscypha	1	1	1	1	1	1	1	0	1	0	0	0	10	4	3	0	2	5	0	0	0	0	0	0	1	0	1	1	1	0
Hydnomerulius pinastri	GCA_000827185.1	38278792	13236	388859	Fungi	Basidiomycota	Agaricomycetes	Boletales	Paxillaceae	Hydnomerulius	3	5	1	1	0	2	0	0	0	0	0	0	0	2	0	0	0	0	1	1	1	1	0	0	0	0	2	1	0	0
Hydnum rufescens	GCA_014904985.1	67135451	18664	139363	Fungi	Basidiomycota	Agaricomycetes	Cantharellales	Hydnaceae	Hydnum	2	1	1	1	0	0	0	1	0	0	0	0	0	2	0	3	0	0	0	1	0	1	0	0	0	0	1	1	0	0
Hygrophoropsis aurantiaca	GCA_021014935.1	36975565	14072	72124	Fungi	Basidiomycota	Agaricomycetes	Boletales	Hygrophoropsidaceae	Hygrophoropsis	2	1	1	2	1	1	0	0	0	0	0	0	0	2	0	0	0	0	1	1	1	1	0	0	0	0	1	1	0	1
Hymenopellis radicata	GCA_015501595.1	78586690	27479	937743	Fungi	Basidiomycota	Agaricomycetes	Agaricales	Physalacriaceae	Hymenopellis	3	7	1	1	1	7	0	1	0	0	0	0	2	2	0	11	1	0	2	1	1	1	0	0	0	0	1	1	0	0
Hymenoscyphus albidus	GCA_911693285.1	51176630	13647	595503	Fungi	Ascomycota	Leotiomycetes	Helotiales	Helotiaceae	Hymenoscyphus	1	1	1	1	1	1	1	0	0	0	0	0	10	1	5	0	2	2	0	1	0	0	0	0	0	0	1	0	1	0
Hymenoscyphus varicosporioides	GCA_021365295.1	48242133	14928	2075069	Fungi	Ascomycota	Leotiomycetes	Helotiales	Helotiaceae	Hymenoscyphus	1	1	1	1	1	1	1	0	0	0	0	0	7	2	5	0	1	1	0	1	0	0	0	0	0	0	1	0	1	0
Hyphodiscus hymeniophilus	GCA_016508695.1	35160837	8215	353542	Fungi	Ascomycota	Leotiomycetes	Helotiales	Hyphodiscaceae	Hyphodiscus	1	1	1	1	1	1	1	0	1	0	0	0	2	1	1	0	2	3	0	0	0	0	0	0	0	0	1	0	1	0
Hypholoma sublateritium	GCA_000827495.1	48031814	17768	71945	Fungi	Basidiomycota	Agaricomycetes	Agaricales	Strophariaceae	Hypholoma	2	1	1	2	1	4	0	1	1	0	0	0	5	3	0	2	0	0	1	1	1	0	0	0	0	0	1	1	0	0
Hyphopichia burtonii	GCA_001661395.1	12403110	5995	717740	Fungi	Ascomycota	Saccharomycetes	Saccharomycetales	Debaryomycetaceae	Hyphopichia	0	1	1	0	1	0	0	0	0	0	0	0	0	1	0	0	0	0	1	0	1	0	0	0	0	0	1	1	1	0
Hypocenomyce scalaris	GCA_022814315.1	31917170	9144	318760	Fungi	Ascomycota	Lecanoromycetes	Umbilicariales	Ophioparmaceae	Hypocenomyce	1	1	1	1	1	1	1	0	0	0	0	0	0	1	0	0	1	0	0	0	0	0	0	0	0	0	0	0	1	0
Hypomontagnella monticulosa	GCA_022385585.1	42439719	12167	2487000	Fungi	Ascomycota	Sordariomycetes	Xylariales	Hypoxylaceae	Hypomontagnella	1	1	1	1	1	1	1	0	0	0	0	0	4	1	5	0	1	1	0	0	0	0	0	0	0	0	1	1	1	0
Hypomontagnella submonticulosa	GCA_022984865.1	40046532	11420	152308	Fungi	Ascomycota	Sordariomycetes	Xylariales	Hypoxylaceae	Hypomontagnella	1	1	1	1	1	1	1	0	0	0	0	0	6	1	6	0	1	1	0	0	1	0	0	0	0	0	1	0	1	0
Hypoxylon argillaceum	GCA_022495175.1	54444476	12590	1799007	Fungi	Ascomycota	Sordariomycetes	Xylariales	Hypoxylaceae	Hypoxylon	1	1	1	1	1	1	1	0	0	0	0	0	4	2	3	0	1	1	0	0	0	0	0	0	0	0	1	1	2	0
Hypoxylon rubiginosum	GCA_022578595.1	42157771	12726	110542	Fungi	Ascomycota	Sordariomycetes	Xylariales	Hypoxylaceae	Hypoxylon	1	1	1	1	1	1	1	0	0	0	0	0	8	1	5	0	2	1	0	0	0	0	0	0	0	0	1	1	1	0
Hysterangium stoloniferum	GCA_015178975.1	111842964	15018	150792	Fungi	Basidiomycota	Agaricomycetes	Hysterangiales	Hysterangiaceae	Hysterangium	2	1	1	2	0	1	0	0	0	0	0	0	0	2	1	2	2	0	0	0	1	1	0	0	0	0	1	1	1	0
Icmadophila ericetorum	GCA_022814295.1	36913724	10886	90408	Fungi	Ascomycota	Lecanoromycetes	Pertusariales	Icmadophilaceae	Icmadophila	1	1	1	1	1	1	1	0	0	0	0	0	1	2	0	0	1	4	0	0	0	0	0	0	0	0	0	1	1	0
Ilyonectria destructans	GCA_020740775.1	71715727	22025	64609	Fungi	Ascomycota	Sordariomycetes	Hypocreales	Nectriaceae	Ilyonectria	1	1	3	1	1	1	1	0	0	0	0	0	4	1	1	0	0	1	1	0	0	0	0	0	0	0	1	0	1	0
Ilyonectria robusta	GCA_021365365.1	59648482	20497	1079257	Fungi	Ascomycota	Sordariomycetes	Hypocreales	Nectriaceae	Ilyonectria	1	1	1	1	1	1	2	0	0	0	0	0	4	1	1	0	1	1	1	0	0	0	0	0	0	0	1	0	1	0
Imleria badia	GCA_015039435.1	38390415	14932	36058	Fungi	Basidiomycota	Agaricomycetes	Boletales	Boletaceae	Imleria	2	1	1	1	0	2	0	0	0	0	0	0	0	2	0	0	0	0	1	1	1	1	0	0	0	0	1	0	0	0
Imshaugia aleurites	GCA_905337355.1	35914147	11113	172621	Fungi	Ascomycota	Lecanoromycetes	Lecanorales	Parmeliaceae	Imshaugia	1	1	1	1	1	0	1	0	0	0	0	0	6	2	0	0	2	1	0	0	0	0	0	0	0	0	0	0	1	0
Infundibulicybe gibba	GCA_015501065.1	65973163	19047	378275	Fungi	Basidiomycota	Agaricomycetes	Agaricales	NA	Infundibulicybe	2	1	1	1	0	2	0	0	0	0	0	0	1	2	0	15	0	0	1	1	1	1	0	0	0	0	1	1	0	0
Irineochytrium annulatum	GCA_027600665.1	36839710	11905	109884	Fungi	Chytridiomycota	Chytridiomycetes	Chytridiales	Chytridiaceae	Irineochytrium	0	1	2	1	0	0	1	1	0	1	0	0	1	2	0	0	0	0	2	0	0	0	1	0	0	0	0	1	0	0
Irpex lacteus	GCA_022606095.1	47742868	15316	5319	Fungi	Basidiomycota	Agaricomycetes	Polyporales	Irpicaceae	Irpex	4	1	2	1	1	1	0	1	0	0	0	0	5	2	0	0	0	0	1	0	1	0	0	0	0	0	1	1	1	0
Irpex rosettiformis	GCA_022160335.1	34571335	12420	378272	Fungi	Basidiomycota	Agaricomycetes	Polyporales	Irpicaceae	Irpex	2	1	1	1	0	1	0	1	0	0	0	0	3	2	0	0	0	0	1	1	1	1	0	0	0	0	1	1	1	0
Jaapia argillacea	GCA_000697665.1	45045899	16375	202697	Fungi	Basidiomycota	Agaricomycetes	Jaapiales	Jaapiaceae	Jaapia	2	1	1	2	1	2	0	1	1	0	0	0	2	2	0	0	3	0	1	1	1	1	0	0	0	0	1	0	0	0
Jackrogersella minutella	GCA_022578535.1	35660783	10913	1955266	Fungi	Ascomycota	Sordariomycetes	Xylariales	Hypoxylaceae	Jackrogersella	1	1	1	1	1	1	1	0	0	0	0	0	5	1	5	0	2	1	0	0	0	0	0	0	0	0	1	0	1	0
Jaminaea rosea	GCA_003144245.1	16615586	6858	1569628	Fungi	Basidiomycota	Exobasidiomycetes	Microstromatales	NA	Jaminaea	1	1	1	1	1	0	1	1	0	0	0	0	0	1	0	0	1	0	0	1	1	0	0	0	0	0	1	0	1	0
Jimgerdemannia flammicorona	GCA_003990745.1	239574967	13124	994334	Fungi	Mucoromycota	Endogonomycetes	Endogonales	Endogonaceae	Jimgerdemannia	2	2	0	0	1	1	0	0	0	1	0	0	0	3	0	0	4	1	0	1	0	1	1	0	0	0	1	2	1	0
Kalaharituber pfeilii	GCA_015179045.1	78991767	15188	139406	Fungi	Ascomycota	Pezizomycetes	Pezizales	Pezizaceae	Kalaharituber	1	1	1	1	1	1	1	0	0	0	0	0	3	1	0	0	4	1	0	1	0	0	0	0	1	0	1	1	1	0
Kalmanozyma brasiliensis	GCA_000497045.1	17325407	6421	1392244	Fungi	Basidiomycota	Ustilaginomycetes	Ustilaginales	Ustilaginaceae	Kalmanozyma	1	1	1	1	1	0	1	1	1	0	0	0	0	1	0	0	1	0	0	1	1	0	0	0	0	0	1	0	0	0
Karstenula rhodostoma	GCA_010093485.1	45074449	15040	301204	Fungi	Ascomycota	Dothideomycetes	Pleosporales	Didymosphaeriaceae	Karstenula	1	1	2	1	1	0	1	0	1	0	0	0	9	1	4	0	3	1	1	1	0	0	0	0	0	0	1	1	1	0
Kazachstania africana	GCA_000304475.1	11130140	5378	432096	Fungi	Ascomycota	Saccharomycetes	Saccharomycetales	Saccharomycetaceae	Kazachstania	0	1	1	0	2	0	0	0	0	0	0	0	0	0	0	0	0	0	1	0	1	0	0	0	0	0	1	3	1	1
Kazachstania exigua	GCA_016584175.1	13507013	5416	34358	Fungi	Ascomycota	Saccharomycetes	Saccharomycetales	Saccharomycetaceae	Kazachstania	0	1	1	0	2	0	0	0	0	0	0	0	0	0	0	0	0	0	1	0	1	0	0	0	0	0	1	1	0	1
Kazachstania naganishii	GCA_000348985.1	10845821	5321	588726	Fungi	Ascomycota	Saccharomycetes	Saccharomycetales	Saccharomycetaceae	Kazachstania	0	1	1	0	2	0	0	0	0	0	0	0	0	0	0	0	0	0	1	0	1	0	0	0	0	0	1	1	0	0
Kickxella alabastrina	GCA_025024165.1	22263034	7284	61397	Fungi	Zoopagomycota	Kickxellomycetes	Kickxellales	Kickxellaceae	Kickxella	2	1	1	1	1	0	0	0	0	0	0	0	0	4	0	0	0	0	0	1	1	1	0	0	0	0	0	1	1	0
Kluyveromyces dobzhanskii	GCA_000820885.1	10741898	4957	51656	Fungi	Ascomycota	Saccharomycetes	Saccharomycetales	Saccharomycetaceae	Kluyveromyces	0	1	1	0	1	0	0	0	0	0	0	0	0	0	0	0	0	0	0	0	1	0	0	0	0	0	1	2	1	1
Kluyveromyces lactis	GCA_000002515.1	10689156	5076	28985	Fungi	Ascomycota	Saccharomycetes	Saccharomycetales	Saccharomycetaceae	Kluyveromyces	0	1	1	0	1	0	0	0	0	0	0	0	0	0	0	0	0	0	1	0	1	0	0	0	0	0	1	2	1	1
Kluyveromyces marxianus	GCA_001417835.1	10895581	4912	4911	Fungi	Ascomycota	Saccharomycetes	Saccharomycetales	Saccharomycetaceae	Kluyveromyces	0	1	1	0	1	0	0	0	0	0	0	0	0	0	0	0	0	0	1	0	1	0	0	0	0	0	1	2	0	1
Knufia peltigerae	GCA_030247855.1	38996579	15670	1002370	Fungi	Ascomycota	Eurotiomycetes	Chaetothyriales	Trichomeriaceae	Knufia	1	2	1	1	1	1	1	0	1	0	0	0	2	2	2	0	0	1	1	1	0	0	0	0	0	0	1	0	1	0
Kockovaella imperatae	GCA_002102565.1	17465713	7392	4999	Fungi	Basidiomycota	Tremellomycetes	Tremellales	Cuniculitremaceae	Kockovaella	1	1	1	1	1	0	0	0	1	1	0	0	1	1	0	0	0	0	0	1	1	0	0	0	0	0	1	0	0	1
Komagataella phaffii	GCA_000027005.1	9216378	5040	460519	Fungi	Ascomycota	Saccharomycetes	Saccharomycetales	Phaffomycetaceae	Komagataella	0	1	1	0	1	0	1	0	0	0	0	0	0	1	0	0	0	0	0	0	1	0	0	0	0	0	1	0	1	0
Kuraishia capsulata	GCA_000576695.1	11371246	6029	317047	Fungi	Ascomycota	Saccharomycetes	Saccharomycetales	NA	Kuraishia	0	1	1	0	1	0	1	0	0	0	0	0	0	1	0	0	0	0	0	0	1	0	0	0	0	0	1	0	1	0
Kwoniella heveanensis	GCA_000507405.3	25469355	7927	89924	Fungi	Basidiomycota	Tremellomycetes	Tremellales	Cryptococcaceae	Kwoniella	1	1	1	1	1	1	1	0	0	1	0	0	1	1	0	0	0	0	0	1	1	0	0	0	0	0	1	1	0	1
Kwoniella mangroviensis	GCA_000507465.3	23257315	8422	463800	Fungi	Basidiomycota	Tremellomycetes	Tremellales	Cryptococcaceae	Kwoniella	1	1	1	1	1	1	1	0	0	1	0	0	1	1	0	0	0	0	0	1	1	0	0	0	0	0	1	1	1	1
Laccaria amethystina	GCA_000827195.1	52197432	21027	89243	Fungi	Basidiomycota	Agaricomycetes	Agaricales	Tricholomataceae	Laccaria	2	1	1	1	1	3	0	1	1	0	0	0	2	2	0	4	0	0	1	1	1	1	0	0	0	0	1	1	1	0
Laccaria bicolor	GCA_000143565.1	64877444	18215	29883	Fungi	Basidiomycota	Agaricomycetes	Agaricales	Tricholomataceae	Laccaria	2	2	1	5	1	0	0	1	1	0	0	0	3	2	0	9	0	0	1	0	1	0	0	0	0	0	1	1	0	0
Lachancea lanzarotensis	GCA_000938715.1	11092131	5058	1245769	Fungi	Ascomycota	Saccharomycetes	Saccharomycetales	Saccharomycetaceae	Lachancea	0	1	1	0	1	0	0	0	0	0	0	0	0	0	0	0	0	0	0	0	1	0	0	0	0	0	1	2	0	0
Lachancea quebecensis	GCA_002900925.1	10229370	5074	1654605	Fungi	Ascomycota	Saccharomycetes	Saccharomycetales	Saccharomycetaceae	Lachancea	0	1	1	0	1	0	0	0	0	0	0	0	0	0	0	0	0	0	1	0	1	0	0	0	0	0	1	2	1	1
Lachancea thermotolerans	GCA_000142805.1	10392862	5092	381046	Fungi	Ascomycota	Saccharomycetes	Saccharomycetales	Saccharomycetaceae	Lachancea	0	1	1	0	1	0	0	0	0	0	0	0	0	0	0	0	0	0	1	0	1	0	0	0	0	0	1	2	0	1
Lachnellula arida	GCA_007821475.1	42724717	9594	1316785	Fungi	Ascomycota	Leotiomycetes	Helotiales	Lachnaceae	Lachnellula	1	1	1	1	0	1	0	0	0	0	0	0	6	1	1	0	4	2	0	1	0	0	0	0	0	0	1	0	1	0
Lachnellula hyalina	GCA_007821495.1	33828344	9157	1316788	Fungi	Ascomycota	Leotiomycetes	Helotiales	Lachnaceae	Lachnellula	1	1	1	1	0	1	1	0	0	0	0	0	4	1	0	0	3	2	0	1	0	0	0	0	0	0	1	0	1	0
Lachnellula occidentalis	GCA_007821535.1	48298069	8910	215460	Fungi	Ascomycota	Leotiomycetes	Helotiales	Lachnaceae	Lachnellula	1	1	1	1	0	1	1	0	0	0	0	0	4	1	1	0	3	2	0	1	0	0	0	0	0	0	1	0	1	0
Lactarius akahatsu	GCA_021524915.1	80299772	12855	416441	Fungi	Basidiomycota	Agaricomycetes	Russulales	Russulaceae	Lactarius	1	1	2	1	1	2	0	1	0	0	0	0	1	2	0	2	0	0	0	1	1	1	0	0	0	0	1	0	0	1
Lactarius hatsudake	GCA_021525005.1	95464894	16826	416442	Fungi	Basidiomycota	Agaricomycetes	Russulales	Russulaceae	Lactarius	1	1	1	1	2	2	0	1	1	0	0	0	1	2	0	1	0	0	0	0	1	1	0	0	0	0	1	1	0	1
Lactarius quietus	GCA_015025155.1	115901997	18939	111141	Fungi	Basidiomycota	Agaricomycetes	Russulales	Russulaceae	Lactarius	1	1	1	0	1	1	0	2	1	0	0	0	17	2	0	2	0	0	0	0	3	1	0	0	0	0	2	1	0	0
Lactifluus subvellereus	GCA_022496195.1	44824221	12801	1837270	Fungi	Basidiomycota	Agaricomycetes	Russulales	Russulaceae	Lactifluus	1	1	1	1	1	1	0	0	1	0	0	0	2	1	0	0	0	0	0	1	1	1	0	0	0	0	1	1	0	0
Lactifluus volemus	GCA_022376515.1	62975844	14966	71967	Fungi	Basidiomycota	Agaricomycetes	Russulales	Russulaceae	Lactifluus	1	1	1	1	1	1	0	0	1	0	0	0	1	1	0	1	0	0	0	1	1	1	0	0	0	0	1	1	0	1
Laetiporus sulphureus	GCA_001632365.1	39909705	13740	5630	Fungi	Basidiomycota	Agaricomycetes	Polyporales	Laetiporaceae	Laetiporus	2	1	1	1	0	2	0	0	0	0	0	0	0	2	0	3	1	0	0	3	1	1	0	0	0	0	1	1	1	1
Lambiella insularis	GCA_022814265.1	36292339	8485	1397036	Fungi	Ascomycota	Lecanoromycetes	Trapeliales	Trapeliaceae	Lambiella	1	1	1	1	1	1	1	0	0	0	0	0	0	1	0	0	0	1	0	0	0	0	0	0	0	0	1	2	1	0
Lanmaoa asiatica	GCA_020310465.1	46638161	9667	1603062	Fungi	Basidiomycota	Agaricomycetes	Boletales	Boletaceae	Lanmaoa	2	1	1	1	0	2	0	0	0	0	0	0	0	2	0	0	0	0	0	0	1	1	0	0	0	0	1	0	0	0
Lasallia pustulata	GCA_008636195.1	32911048	9825	136370	Fungi	Ascomycota	Lecanoromycetes	Umbilicariales	Umbilicariaceae	Lasallia	2	1	1	1	1	1	1	0	0	0	0	0	0	1	0	0	1	0	0	0	0	0	0	0	0	0	1	0	1	0
Lasiodiplodia theobromae	GCA_002111425.1	43283415	12892	45133	Fungi	Ascomycota	Dothideomycetes	Botryosphaeriales	Botryosphaeriaceae	Lasiodiplodia	1	1	1	1	1	1	1	0	0	0	0	0	2	1	0	0	0	1	1	1	0	0	0	0	0	0	1	1	1	0
Lecanicillium fungicola	GCA_027595875.1	39009180	11409	93591	Fungi	Ascomycota	Sordariomycetes	Hypocreales	Cordycipitaceae	Lecanicillium	1	1	1	1	1	1	2	0	0	0	0	0	2	1	2	0	1	1	0	0	0	0	0	0	0	0	0	1	2	0
Lecanicillium saksenae	GCA_027627215.1	35354223	11361	468837	Fungi	Ascomycota	Sordariomycetes	Hypocreales	Cordycipitaceae	Lecanicillium	1	1	1	1	1	1	1	0	0	0	0	0	0	0	0	0	3	1	0	0	0	0	0	0	0	0	1	2	3	0
Lentinula edodes	GCA_002003045.1	39922873	12051	5353	Fungi	Basidiomycota	Agaricomycetes	Agaricales	Omphalotaceae	Lentinula	5	1	1	1	0	3	0	0	0	0	0	0	1	2	0	3	0	0	1	1	0	1	0	0	0	0	1	1	0	0
Lentinus tigrinus	GCA_003813185.1	39530113	15369	5365	Fungi	Basidiomycota	Agaricomycetes	Polyporales	Polyporaceae	Lentinus	2	1	1	1	1	2	0	0	1	0	0	0	2	2	0	3	1	0	0	1	1	1	0	0	0	0	1	0	1	1
Lentithecium fluviatile	GCA_010405425.1	54688705	16711	690899	Fungi	Ascomycota	Dothideomycetes	Pleosporales	Lentitheciaceae	Lentithecium	1	1	1	1	1	1	1	0	0	1	0	0	8	2	4	0	1	1	1	1	0	0	0	0	0	0	1	1	1	0
Lenzites betulinus	GCA_022264855.1	37463246	13234	5632	Fungi	Basidiomycota	Agaricomycetes	Polyporales	Polyporaceae	Lenzites	2	1	1	1	1	1	0	0	0	0	0	0	4	2	0	1	0	0	0	1	1	1	0	0	0	0	1	1	1	0
Lepidopterella palustris	GCA_001692735.1	45668136	13860	741139	Fungi	Ascomycota	Dothideomycetes	Mytilinidiales	Argynnaceae	Lepidopterella	1	1	1	1	1	1	1	0	1	0	0	0	7	1	0	0	1	1	1	1	0	0	0	0	0	0	1	1	1	0
Lepista nuda	GCA_015584075.1	43493018	14876	64659	Fungi	Basidiomycota	Agaricomycetes	Agaricales	NA	Lepista	2	1	1	2	1	2	0	1	0	0	0	0	1	2	0	5	0	0	1	1	1	0	0	0	0	0	1	1	0	1
Letharia columbiana	GCA_014066305.1	52265057	13312	112416	Fungi	Ascomycota	Lecanoromycetes	Lecanorales	Parmeliaceae	Letharia	1	1	1	1	1	0	1	0	0	0	0	0	5	1	0	0	2	3	0	0	0	0	0	0	0	0	1	0	1	0
Letharia lupina	GCA_014066315.1	49238647	11014	560253	Fungi	Ascomycota	Lecanoromycetes	Lecanorales	Parmeliaceae	Letharia	1	1	1	1	1	0	1	0	0	0	0	0	3	0	0	0	2	2	0	0	0	0	0	0	0	0	0	0	1	0
Letrouitia leprolyta	GCA_023646175.1	27853102	8503	2905938	Fungi	Ascomycota	Lecanoromycetes	Teloschistales	Letrouitiaceae	Letrouitia	1	1	2	1	1	0	1	1	0	0	0	0	0	1	0	0	0	0	0	0	0	0	0	0	0	0	0	2	0	0
Letrouitia transgressa	GCA_023645855.1	27985263	8510	1145322	Fungi	Ascomycota	Lecanoromycetes	Teloschistales	Letrouitiaceae	Letrouitia	1	1	1	1	1	0	0	0	0	0	0	0	0	0	0	0	0	1	0	0	0	0	0	0	0	0	0	1	0	0
Leucoagaricus leucothites	GCA_013368445.1	47309141	11537	201217	Fungi	Basidiomycota	Agaricomycetes	Agaricales	Agaricaceae	Leucoagaricus	2	1	1	1	1	1	0	0	0	0	0	0	1	2	0	2	0	0	0	1	0	1	0	0	0	0	1	1	0	0
Leucocoprinus birnbaumii	GCA_027627405.1	45705486	13108	56174	Fungi	Basidiomycota	Agaricomycetes	Agaricales	Agaricaceae	Leucocoprinus	2	0	1	0	0	2	0	1	0	0	0	0	1	2	0	3	0	0	1	1	1	1	0	0	0	0	1	1	0	0
Leucogyrophana mollusca	GCA_021014945.1	35193237	14605	85980	Fungi	Basidiomycota	Agaricomycetes	Boletales	NA	Leucogyrophana	2	1	1	3	1	2	0	0	0	0	0	0	1	2	0	0	0	0	1	1	1	1	0	0	0	0	1	1	0	0
Leucosporidium creatinivorum	GCA_002105055.1	26329764	9854	106004	Fungi	Basidiomycota	Microbotryomycetes	Leucosporidiales	Leucosporidiaceae	Leucosporidium	0	1	1	1	1	1	1	1	0	0	0	0	2	1	0	1	3	0	0	1	0	0	0	0	0	0	1	1	1	1
Lichina confinis	GCA_026054655.1	25172334	6269	174425	Fungi	Ascomycota	Lichinomycetes	Lichinales	Lichinaceae	Lichina	1	1	1	1	0	1	1	0	0	0	0	0	0	1	0	0	0	0	0	0	0	0	0	0	0	0	0	0	0	0
Lichtheimia corymbifera	GCA_000723665.1	33531723	12282	42458	Fungi	Mucoromycota	Mucoromycetes	Mucorales	Lichtheimiaceae	Lichtheimia	0	1	1	3	1	0	1	1	1	0	0	0	0	2	0	0	0	0	0	1	0	1	0	1	0	1	0	2	0	0
Lichtheimia hyalospora	GCA_025094155.1	33282407	12049	420593	Fungi	Mucoromycota	Mucoromycetes	Mucorales	Lichtheimiaceae	Lichtheimia	1	1	2	3	1	0	1	1	1	0	0	0	0	4	0	0	0	0	1	1	1	1	1	1	0	0	1	2	1	0
Lichtheimia ramosa	GCA_000945115.1	30708998	11515	688394	Fungi	Mucoromycota	Mucoromycetes	Mucorales	Lichtheimiaceae	Lichtheimia	1	1	2	3	1	0	1	1	0	0	0	0	0	4	0	0	0	0	1	1	1	1	1	1	0	1	1	2	1	1
Lignoscripta atroalba	GCA_022814235.1	26506769	7945	2918522	Fungi	Ascomycota	Lecanoromycetes	Trapeliales	Trapeliaceae	Lignoscripta	1	1	1	1	1	1	1	0	0	0	0	0	1	1	0	0	1	1	0	1	0	0	0	0	0	0	1	2	1	0
Linderina macrospora	GCA_027575855.1	15821707	7268	4868	Fungi	Zoopagomycota	Kickxellomycetes	Kickxellales	Kickxellaceae	Linderina	2	1	1	1	0	0	0	0	0	0	0	0	0	1	0	0	0	0	0	0	1	0	0	0	0	0	0	0	1	0
Linderina pennispora	GCA_002104995.1	26202545	9350	61395	Fungi	Zoopagomycota	Kickxellomycetes	Kickxellales	Kickxellaceae	Linderina	2	1	1	0	0	0	0	0	0	0	0	0	0	2	0	0	0	0	1	1	1	1	0	0	0	0	0	1	1	0
Lindgomyces ingoldianus	GCA_010093535.1	69030646	15954	673940	Fungi	Ascomycota	Dothideomycetes	Pleosporales	Lindgomycetaceae	Lindgomyces	1	1	1	1	1	1	1	0	1	0	0	0	6	1	3	0	4	1	1	1	0	0	0	0	0	0	1	2	1	0
Lineolata rhizophorae	GCA_010093515.1	31143728	10230	578093	Fungi	Ascomycota	Dothideomycetes	Lineolatales	Lineolataceae	Lineolata	1	1	1	2	1	1	1	0	0	0	0	0	2	1	1	0	0	1	0	1	0	0	0	0	0	0	1	1	1	0
Linnemannia elongata	GCA_001651415.1	49851634	14959	310910	Fungi	Mucoromycota	Mortierellomycetes	Mortierellales	Mortierellaceae	Linnemannia	1	1	2	1	0	0	1	2	0	0	0	0	1	2	0	0	0	0	2	1	1	2	1	1	0	0	1	1	1	2
Linnemannia schmuckeri	GCA_015502505.1	46051948	12060	64567	Fungi	Mucoromycota	Mortierellomycetes	Mortierellales	Mortierellaceae	Linnemannia	1	1	2	1	0	0	1	2	0	0	0	0	0	2	0	0	0	0	2	1	1	2	1	1	0	0	1	1	1	2
Lipomyces starkeyi	GCA_001661325.1	21267709	8182	29829	Fungi	Ascomycota	Saccharomycetes	Saccharomycetales	Lipomycetaceae	Lipomyces	0	1	1	1	0	1	0	0	0	0	0	0	0	1	0	0	0	0	1	0	1	0	0	0	0	0	1	0	1	0
Lipomyces tetrasporus	GCA_029532465.1	20779202	8004	54092	Fungi	Ascomycota	Saccharomycetes	Saccharomycetales	Lipomycetaceae	Lipomyces	1	1	1	1	0	1	0	0	0	0	0	0	0	1	0	0	0	0	1	0	1	0	0	0	0	0	1	0	1	0
Lizonia empirigonia	GCA_009982855.1	51521545	12467	1496277	Fungi	Ascomycota	Dothideomycetes	NA	Pseudoperisporiaceae	Lizonia	1	1	1	1	1	0	1	0	1	0	0	0	4	1	2	0	5	1	1	1	0	0	0	0	0	0	2	1	1	0
Lobaria immixta	GCA_022814215.1	55886429	12073	669869	Fungi	Ascomycota	Lecanoromycetes	Peltigerales	Lobariaceae	Lobaria	1	1	1	1	1	0	1	0	0	0	0	0	3	2	0	0	3	1	0	1	0	0	0	0	0	0	1	0	1	0
Lobosporangium transversale	GCA_002105155.1	42768949	11818	64571	Fungi	Mucoromycota	Mortierellomycetes	Mortierellales	Mortierellaceae	Lobosporangium	1	1	1	1	1	0	1	1	1	0	0	0	0	2	0	0	1	0	1	1	1	2	1	1	0	0	1	0	1	2
Lobulomyces angularis	GCA_027604685.1	24944094	9112	109889	Fungi	Chytridiomycota	Chytridiomycetes	Lobulomycetales	Lobulomycetaceae	Lobulomyces	1	1	2	3	0	0	1	2	1	0	0	0	2	3	0	0	0	0	2	0	0	1	0	1	0	0	0	2	1	1
Lodderomyces elongisporus	GCA_000149685.1	15547272	5799	36914	Fungi	Ascomycota	Saccharomycetes	Saccharomycetales	Debaryomycetaceae	Lodderomyces	0	1	1	0	0	0	0	0	0	0	0	0	0	1	0	0	0	0	1	0	0	0	0	0	0	0	1	1	1	0
Lomentospora prolificans	GCA_002276285.1	37627092	8560	41688	Fungi	Ascomycota	Sordariomycetes	Microascales	Microascaceae	Lomentospora	1	1	1	1	1	1	1	0	0	0	0	0	1	0	4	0	1	1	0	0	0	0	0	0	0	0	1	0	1	0
Lophiostoma macrostomum	GCA_010405375.1	42575690	16135	372055	Fungi	Ascomycota	Dothideomycetes	Pleosporales	Lophiostomataceae	Lophiostoma	1	1	1	1	1	1	2	0	0	0	0	0	5	1	4	0	2	1	1	1	0	0	0	0	2	0	1	1	1	0
Lophiotrema nucula	GCA_010015825.1	48642237	18115	690887	Fungi	Ascomycota	Dothideomycetes	Pleosporales	Lophiotremataceae	Lophiotrema	1	1	1	1	1	2	1	0	1	0	0	0	8	1	5	0	3	1	1	1	0	0	0	0	0	0	1	2	1	0
Lophium mytilinum	GCA_010093605.1	43412209	15150	390894	Fungi	Ascomycota	Dothideomycetes	Mytilinidiales	Mytilinidiaceae	Lophium	1	1	1	1	1	1	1	0	0	0	0	0	7	1	1	0	1	4	1	0	0	0	0	0	1	0	1	2	1	0
Loxospora ochrophaea	GCA_022814175.1	24741702	8117	400354	Fungi	Ascomycota	Lecanoromycetes	Sarrameanales	Sarrameanaceae	Loxospora	1	1	1	1	1	1	1	0	0	0	0	0	0	2	0	0	1	1	0	0	0	0	0	0	0	0	0	1	1	0
Lunasporangiospora selenospora	GCA_015680635.1	40535554	10951	979761	Fungi	Mucoromycota	Mortierellomycetes	Mortierellales	Mortierellaceae	Lunasporangiospora	1	1	0	1	1	0	1	1	0	0	0	0	0	1	0	0	0	0	2	1	1	2	1	2	0	0	0	0	1	1
Lyophyllum atratum	GCA_014905825.1	64896558	15046	117065	Fungi	Basidiomycota	Agaricomycetes	Agaricales	Lyophyllaceae	Lyophyllum	2	2	1	2	0	5	0	0	1	0	0	0	1	2	0	5	0	0	1	0	1	1	0	0	0	0	1	1	1	0
Lyophyllum shimeji	GCA_026008595.1	31834823	12906	47721	Fungi	Basidiomycota	Agaricomycetes	Agaricales	Lyophyllaceae	Lyophyllum	2	1	1	1	1	2	0	0	1	0	0	0	1	2	0	4	0	0	1	1	1	1	0	0	0	0	1	0	1	1
Macrolepiota fuliginosa	GCA_015584085.1	46382382	15754	201230	Fungi	Basidiomycota	Agaricomycetes	Agaricales	Agaricaceae	Macrolepiota	2	1	1	1	1	2	0	0	0	0	0	0	1	2	0	3	0	0	1	1	1	1	0	0	0	0	1	0	0	0
Macroventuria anomochaeta	GCA_010093625.1	33336106	12954	301207	Fungi	Ascomycota	Dothideomycetes	Pleosporales	Didymellaceae	Macroventuria	1	1	1	1	1	0	1	0	0	0	0	0	3	1	2	0	0	2	1	1	0	0	0	0	0	0	2	1	1	0
Madurella mycetomatis	GCA_001275765.2	36704944	10707	100816	Fungi	Ascomycota	Sordariomycetes	Sordariales	NA	Madurella	1	1	0	1	1	1	1	0	0	0	0	1	2	1	14	0	1	1	0	0	0	0	0	0	0	0	2	3	1	0
Magnaporthiopsis poae	GCA_000193285.1	39641827	12163	148304	Fungi	Ascomycota	Sordariomycetes	Magnaporthales	Magnaporthaceae	Magnaporthiopsis	1	1	2	1	2	1	1	0	0	0	0	1	4	1	6	0	2	1	0	0	0	0	0	0	0	0	1	1	2	0
Malassezia globosa	GCA_000181695.1	89581180	4286	76773	Fungi	Basidiomycota	Malasseziomycetes	Malasseziales	Malasseziaceae	Malassezia	0	0	1	1	1	0	0	0	0	0	0	0	0	1	0	0	1	0	0	1	0	0	0	0	0	0	2	0	0	0
Malassezia pachydermatis	GCA_001278385.1	8150648	4202	77020	Fungi	Basidiomycota	Malasseziomycetes	Malasseziales	Malasseziaceae	Malassezia	0	1	1	1	1	0	0	0	0	0	0	0	0	1	0	0	1	0	0	1	1	0	0	0	0	0	1	0	1	1
Malassezia sympodialis	GCA_000349305.2	7669689	3318	76777	Fungi	Basidiomycota	Malasseziomycetes	Malasseziales	Malasseziaceae	Malassezia	0	0	1	1	0	0	0	0	0	0	0	0	0	0	0	0	0	0	0	0	1	0	0	0	0	0	0	0	0	1
Marasmius fiardii	GCA_014904975.1	59447912	17096	1328755	Fungi	Basidiomycota	Agaricomycetes	Agaricales	Marasmiaceae	Marasmius	2	1	1	1	0	2	0	0	1	0	0	0	2	2	0	4	0	0	1	1	1	1	0	0	0	0	1	1	0	0
Marasmius oreades	GCA_018924745.1	44372355	13701	181124	Fungi	Basidiomycota	Agaricomycetes	Agaricales	Marasmiaceae	Marasmius	2	1	1	1	0	2	0	0	0	0	0	0	2	2	0	1	0	0	1	1	1	1	0	0	0	0	1	1	0	0
Marasmius tenuissimus	GCA_029532415.1	71059515	24462	585030	Fungi	Basidiomycota	Agaricomycetes	Agaricales	Marasmiaceae	Marasmius	1	1	1	2	1	1	0	1	0	0	0	0	3	2	0	7	0	0	1	1	1	1	0	0	0	0	1	0	0	0
Marssonina coronariae	GCA_002204255.1	50267101	9355	503106	Fungi	Ascomycota	Leotiomycetes	Helotiales	Dermateaceae	Marssonina	1	1	1	1	0	1	1	0	1	0	0	0	4	1	1	0	1	4	0	1	0	0	0	0	0	0	1	0	1	0
Martensiomyces pterosporus	GCA_025201845.1	19815802	8382	61414	Fungi	Zoopagomycota	Kickxellomycetes	Kickxellales	Kickxellaceae	Martensiomyces	3	1	1	1	1	0	0	0	0	0	0	0	0	2	0	0	0	0	1	1	1	1	0	0	0	0	0	1	1	0
Massarina eburnea	GCA_010093635.1	38236937	12935	45293	Fungi	Ascomycota	Dothideomycetes	Pleosporales	Massarinaceae	Massarina	1	1	1	1	1	1	1	0	1	1	0	0	6	1	5	0	0	1	1	1	0	0	0	0	0	0	1	1	1	0
Massariosphaeria phaeospora	GCA_011032825.1	42105601	14021	100035	Fungi	Ascomycota	Dothideomycetes	Pleosporales	NA	Massariosphaeria	1	1	1	1	1	1	1	0	0	0	0	0	6	1	5	0	3	1	1	1	0	0	0	0	0	0	1	1	1	0
Massospora cicadina	GCA_022478985.1	1488883982	5453	348617	Fungi	Zoopagomycota	Entomophthoromycetes	Entomophthorales	Entomophthoraceae	Massospora	2	1	1	1	0	0	0	0	0	0	0	0	0	1	0	0	0	0	0	0	0	1	0	0	0	0	0	0	1	0
Meira miltonrushii	GCA_003144205.1	17383515	7452	1280837	Fungi	Basidiomycota	Exobasidiomycetes	Exobasidiales	Brachybasidiaceae	Meira	1	1	1	1	1	0	1	0	0	0	0	0	0	0	0	0	1	0	0	1	1	0	0	0	0	0	1	0	1	0
Melampsora americana	GCA_022264835.1	112349310	15983	2182807	Fungi	Basidiomycota	Pucciniomycetes	Pucciniales	Melampsoraceae	Melampsora	2	2	1	1	1	0	1	1	0	1	0	0	1	1	8	1	0	0	0	0	1	0	0	0	0	0	1	0	0	0
Melampsora larici-populina	GCA_000204055.1	101129028	16372	203908	Fungi	Basidiomycota	Pucciniomycetes	Pucciniales	Melampsoraceae	Melampsora	1	1	1	1	1	0	1	2	0	1	0	0	1	0	10	1	0	0	0	0	0	0	0	0	0	0	1	1	0	0
Melanogaster broomeanus	GCA_014904935.1	49614189	14167	2655010	Fungi	Basidiomycota	Agaricomycetes	Boletales	Melanogastraceae	Melanogaster	3	1	1	1	0	2	0	0	0	0	0	0	0	2	0	0	0	0	1	1	0	0	0	0	0	0	1	0	0	0
Melanomma pulvis-pyrius	GCA_010093585.1	42094923	15834	100047	Fungi	Ascomycota	Dothideomycetes	Pleosporales	Melanommataceae	Melanomma	1	1	1	1	1	0	1	0	0	0	0	0	6	2	4	0	1	1	1	1	0	0	0	0	1	0	1	1	1	0
Metarhizium acridum	GCA_000187405.1	39422329	9849	92637	Fungi	Ascomycota	Sordariomycetes	Hypocreales	Clavicipitaceae	Metarhizium	1	1	1	1	1	1	1	0	0	0	0	0	1	1	2	0	2	1	0	0	0	0	0	0	0	0	1	2	2	0
Metarhizium anisopliae	GCA_000426965.1	38672492	11415	5530	Fungi	Ascomycota	Sordariomycetes	Hypocreales	Clavicipitaceae	Metarhizium	1	1	1	1	1	2	1	0	0	0	0	0	1	1	0	0	1	1	0	0	0	0	0	0	0	0	1	2	2	0
Metarhizium robertsii	GCA_000187425.2	41656800	11688	568076	Fungi	Ascomycota	Sordariomycetes	Hypocreales	Clavicipitaceae	Metarhizium	1	1	1	1	1	1	1	0	0	0	0	0	1	1	0	0	1	1	0	0	0	0	0	0	0	0	1	1	2	0
Metschnikowia aff.	GCA_004217705.1	15801215	5800	2163413	Fungi	Ascomycota	Saccharomycetes	Saccharomycetales	Metschnikowiaceae	Metschnikowia	0	1	1	0	1	0	0	0	0	0	0	0	0	0	0	0	0	0	1	0	1	0	0	0	0	0	1	1	1	0
Metschnikowia bicuspidata	GCA_001664035.1	16055203	5837	27322	Fungi	Ascomycota	Saccharomycetes	Saccharomycetales	Metschnikowiaceae	Metschnikowia	0	1	1	0	0	0	0	0	0	0	0	0	0	0	0	0	0	0	1	0	1	0	0	0	0	0	1	2	1	0
Meyerozyma guilliermondii	GCA_000149425.1	10609954	5920	4929	Fungi	Ascomycota	Saccharomycetes	Saccharomycetales	Debaryomycetaceae	Meyerozyma	0	1	1	0	1	0	0	0	0	0	0	0	0	1	0	0	0	0	1	0	1	0	0	0	0	0	1	1	1	0
Microbotryum intermedium	GCA_900096595.1	23461035	8142	269621	Fungi	Basidiomycota	Microbotryomycetes	Microbotryales	Microbotryaceae	Microbotryum	1	1	1	1	1	1	1	1	0	0	0	0	1	1	0	0	1	0	0	1	0	0	0	0	0	0	1	1	1	1
Microbotryum lychnidis-dioicae	GCA_000166175.1	26138885	7364	288795	Fungi	Basidiomycota	Microbotryomycetes	Microbotryales	Microbotryaceae	Microbotryum	1	1	1	1	1	1	1	0	0	0	0	0	1	1	1	0	2	0	0	1	0	0	0	0	0	0	1	0	0	0
Microbotryum saponariae	GCA_900100905.1	29498536	10729	289078	Fungi	Basidiomycota	Microbotryomycetes	Microbotryales	Microbotryaceae	Microbotryum	1	1	1	1	1	1	1	1	0	0	0	0	1	1	0	0	2	0	0	1	0	0	0	0	0	0	1	0	1	0
Microdochium bolleyi	GCA_001566295.1	38835037	13165	196109	Fungi	Ascomycota	Sordariomycetes	Xylariales	Microdochiaceae	Microdochium	1	1	1	1	1	0	1	0	0	0	0	0	3	1	0	0	2	1	1	0	0	0	0	0	0	0	1	0	3	0
Microdochium nivale	GCA_026745475.1	37029846	11788	5520	Fungi	Ascomycota	Sordariomycetes	Xylariales	Microdochiaceae	Microdochium	1	1	1	1	1	1	1	0	1	0	0	0	3	2	0	0	1	1	1	0	0	0	0	0	0	0	1	0	2	0
Microdochium trichocladiopsis	GCA_020744255.1	49282715	16023	1682393	Fungi	Ascomycota	Sordariomycetes	Xylariales	Microdochiaceae	Microdochium	1	1	1	1	1	1	1	0	0	0	0	0	3	2	0	0	2	1	1	0	0	0	0	0	0	0	1	1	2	0
Microsporum canis	GCA_000151145.1	23263091	8765	63405	Fungi	Ascomycota	Eurotiomycetes	Onygenales	Arthrodermataceae	Microsporum	1	1	1	1	1	0	1	0	0	0	0	0	1	1	0	0	1	1	0	0	0	0	0	0	0	0	1	1	0	0
Microthyrium microscopicum	GCA_010405405.1	37120677	12493	703497	Fungi	Ascomycota	Dothideomycetes	Microthyriales	Microthyriaceae	Microthyrium	1	1	1	2	1	0	1	1	1	0	0	0	9	1	4	0	1	2	1	1	0	0	0	0	0	0	1	0	1	0
Millerozyma farinosa	GCA_000315895.1	21459642	11175	4920	Fungi	Ascomycota	Saccharomycetes	Saccharomycetales	Debaryomycetaceae	Millerozyma	0	2	2	0	0	0	0	0	0	0	0	0	0	0	0	0	0	0	2	0	2	0	0	0	0	0	2	4	2	0
Mitosporidium daphniae	GCA_000760515.2	5635072	3330	1485682	Fungi	Microsporidia	NA	NA	NA	Mitosporidium	1	2	1	0	1	0	0	0	0	0	0	0	0	0	0	0	0	0	0	0	0	1	0	0	0	0	0	0	0	0
Mixia osmundae	GCA_000241205.2	13393708	6726	34349	Fungi	Basidiomycota	Mixiomycetes	Mixiales	Mixiaceae	Mixia	0	1	1	2	1	0	1	1	0	1	0	0	1	1	1	0	1	0	0	0	2	0	0	0	0	0	1	1	1	1
Modicella reniformis	GCA_015849295.1	43601575	12900	1440133	Fungi	Mucoromycota	Mortierellomycetes	Mortierellales	Mortierellaceae	Modicella	1	0	0	1	1	0	1	1	1	0	0	0	3	1	0	0	0	0	1	1	1	2	0	1	0	0	1	0	1	0
Moelleriella libera	GCA_001636675.1	30871875	8461	324773	Fungi	Ascomycota	Sordariomycetes	Hypocreales	Clavicipitaceae	Moelleriella	1	1	1	1	1	1	1	0	0	0	0	0	2	1	1	0	0	1	1	0	0	0	0	0	0	0	1	1	1	0
Moesziomyces antarcticus	GCA_000334475.1	18065590	6640	84753	Fungi	Basidiomycota	Ustilaginomycetes	Ustilaginales	Ustilaginaceae	Moesziomyces	0	1	1	1	1	0	1	1	1	0	0	0	0	1	0	0	1	0	0	1	1	0	0	0	0	0	1	0	0	0
Moesziomyces aphidis	GCA_000517465.1	17921702	6011	84754	Fungi	Basidiomycota	Ustilaginomycetes	Ustilaginales	Ustilaginaceae	Moesziomyces	0	1	0	1	1	0	1	0	1	0	0	0	0	1	0	0	1	0	0	1	1	0	0	0	0	0	1	0	0	0
Mollisia scopiformis	GCA_001500285.1	48876257	18567	149040	Fungi	Ascomycota	Leotiomycetes	Helotiales	Mollisiaceae	Mollisia	1	1	1	1	1	1	2	0	1	0	0	0	10	7	2	0	3	5	0	0	0	0	0	0	0	0	1	2	1	0
Monilinia fructicola	GCA_008692225.1	44047900	12118	38448	Fungi	Ascomycota	Leotiomycetes	Helotiales	Sclerotiniaceae	Monilinia	1	1	1	1	0	0	1	0	0	0	0	0	4	1	0	0	0	2	0	0	0	0	0	0	0	0	1	0	1	0
Monilinia fructigena	GCA_003260565.1	43125165	10502	38457	Fungi	Ascomycota	Leotiomycetes	Helotiales	Sclerotiniaceae	Monilinia	0	1	1	1	1	0	1	0	0	0	0	0	4	0	0	0	0	3	0	0	0	0	0	0	0	0	1	0	1	0
Monilinia laxa	GCA_009299455.1	42814844	11163	61186	Fungi	Ascomycota	Leotiomycetes	Helotiales	Sclerotiniaceae	Monilinia	1	1	1	1	1	0	1	0	0	0	0	1	4	1	0	0	1	4	0	1	0	0	0	0	0	0	1	0	1	0
Moniliophthora perniciosa	GCA_000183025.1	26663261	13560	153609	Fungi	Basidiomycota	Agaricomycetes	Agaricales	Marasmiaceae	Moniliophthora	2	0	0	1	1	2	0	0	0	0	0	0	1	0	0	2	0	0	0	0	0	1	0	0	0	0	0	0	0	0
Moniliophthora roreri	GCA_000488995.1	52204869	17910	221103	Fungi	Basidiomycota	Agaricomycetes	Agaricales	Marasmiaceae	Moniliophthora	2	1	1	1	1	2	0	0	0	0	0	0	2	2	0	4	0	0	1	1	1	1	0	0	0	0	1	1	0	0
Monosporascus cannonballus	GCA_004154925.1	89620939	10678	155416	Fungi	Ascomycota	Sordariomycetes	Xylariales	NA	Monosporascus	1	1	1	1	1	1	1	0	0	0	0	0	2	2	2	0	1	1	0	0	0	0	0	0	1	0	1	1	1	0
Monosporascus ibericus	GCA_004154915.1	87248235	11060	155417	Fungi	Ascomycota	Sordariomycetes	Xylariales	NA	Monosporascus	1	1	1	1	1	1	1	0	0	0	0	0	4	2	2	0	1	1	0	0	0	0	0	0	0	0	1	0	1	0
Morchella conica	GCA_003790465.1	48213273	11592	5194	Fungi	Ascomycota	Pezizomycetes	Pezizales	Morchellaceae	Morchella	1	1	1	1	0	1	1	0	0	0	0	0	5	1	0	0	1	0	0	1	0	0	0	0	0	0	1	0	1	0
Morchella importuna	GCA_003444635.2	50927171	11642	1174673	Fungi	Ascomycota	Pezizomycetes	Pezizales	Morchellaceae	Morchella	1	1	1	1	0	1	1	0	0	0	0	0	4	1	0	0	0	0	0	1	0	0	0	0	0	0	1	0	1	0
Morchella sextelata	GCA_020137385.1	53569587	13182	1174677	Fungi	Ascomycota	Pezizomycetes	Pezizales	Morchellaceae	Morchella	1	1	2	1	0	1	1	0	0	0	0	0	6	1	0	0	1	0	0	0	0	0	0	0	0	0	1	0	1	0
Mortierella alpina	GCA_015679415.1	37282625	10869	64518	Fungi	Mucoromycota	Mortierellomycetes	Mortierellales	Mortierellaceae	Mortierella	1	1	1	1	1	0	1	2	1	0	0	0	1	2	0	0	0	0	2	1	1	1	1	1	0	0	1	1	1	2
Mortierella antarctica	GCA_015679405.1	38836798	11804	979670	Fungi	Mucoromycota	Mortierellomycetes	Mortierellales	Mortierellaceae	Mortierella	1	1	2	1	1	0	2	1	0	0	0	0	0	2	0	0	0	0	2	1	1	2	1	1	0	0	1	1	1	1
Mortierella hygrophila	GCA_015680625.1	46054087	12256	979708	Fungi	Mucoromycota	Mortierellomycetes	Mortierellales	Mortierellaceae	Mortierella	1	1	2	1	1	0	1	2	0	0	0	0	1	2	0	0	1	0	2	1	1	2	1	0	0	0	1	1	1	2
Mucidula mucida	GCA_015501055.1	61732987	18561	139077	Fungi	Basidiomycota	Agaricomycetes	Agaricales	Physalacriaceae	Mucidula	3	2	1	1	1	1	0	0	1	0	0	0	1	2	0	9	2	0	1	1	1	1	0	0	0	0	1	0	0	0
Mucor ambiguus	GCA_000950595.1	40737472	11343	91626	Fungi	Mucoromycota	Mucoromycetes	Mucorales	Mucoraceae	Mucor	1	1	2	2	2	0	1	2	1	0	0	0	0	4	0	0	0	0	1	1	1	1	0	0	0	1	1	2	1	0
Mucor circinelloides	GCA_000401635.1	36348485	12227	36080	Fungi	Mucoromycota	Mucoromycetes	Mucorales	Mucoraceae	Mucor	1	1	2	2	2	0	1	2	1	0	0	0	0	4	0	0	0	0	1	1	1	2	0	0	0	1	1	2	1	0
Mucor lusitanicus	GCA_001638945.1	36567582	11707	29924	Fungi	Mucoromycota	Mucoromycetes	Mucorales	Mucoraceae	Mucor	1	1	3	2	2	0	1	2	1	0	0	0	0	4	0	0	0	0	1	1	1	0	0	0	0	0	1	2	1	1
Multifurca ochricompacta	GCA_022496185.1	54697930	10515	376703	Fungi	Basidiomycota	Agaricomycetes	Russulales	Russulaceae	Multifurca	1	1	1	1	1	1	0	0	0	0	0	0	1	2	0	2	0	0	0	0	1	1	0	0	0	0	1	1	0	0
Mycena chlorophos	GCA_014461115.1	50883660	13505	658473	Fungi	Basidiomycota	Agaricomycetes	Agaricales	Mycenaceae	Mycena	3	1	1	1	0	2	0	0	0	0	0	0	2	1	0	15	0	0	1	1	1	1	0	0	0	0	1	0	0	2
Mycena indigotica	GCA_014461135.1	72886219	13735	2126181	Fungi	Basidiomycota	Agaricomycetes	Agaricales	Mycenaceae	Mycena	3	1	1	1	0	3	0	0	0	0	0	0	6	2	0	23	0	0	1	1	1	1	0	0	0	0	1	1	0	0
Mycena kentingensis	GCA_014461125.1	65015191	14271	1325293	Fungi	Basidiomycota	Agaricomycetes	Agaricales	Mycenaceae	Mycena	2	1	1	1	0	4	0	0	0	0	0	0	4	4	0	16	0	0	1	0	1	1	0	0	0	0	1	0	0	1
Mycoblastus sanguinarius	GCA_022814195.1	52424161	11731	312200	Fungi	Ascomycota	Lecanoromycetes	Lecanorales	Mycoblastaceae	Mycoblastus	1	1	1	1	1	0	1	0	0	0	0	0	2	1	0	0	4	1	0	0	0	0	0	0	0	0	1	1	1	0
Mycoemilia scoparia	GCA_027575805.1	23047638	6297	417184	Fungi	Zoopagomycota	Kickxellomycetes	Kickxellales	Kickxellaceae	Mycoemilia	3	1	1	1	1	0	0	0	1	0	0	0	0	2	0	0	0	0	1	0	0	1	0	0	0	0	0	1	0	0
Mycotypha africana	GCA_025528875.1	29202882	10914	64632	Fungi	Mucoromycota	Mucoromycetes	Mucorales	Mycotyphaceae	Mycotypha	1	1	2	2	2	0	1	2	0	0	0	0	0	3	0	0	0	0	1	1	1	1	0	0	0	1	1	2	1	0
Myriangium duriaei	GCA_010093895.1	25685045	10674	147570	Fungi	Ascomycota	Dothideomycetes	Myriangiales	Myriangiaceae	Myriangium	1	1	1	1	1	1	1	0	0	0	0	1	1	0	0	0	0	1	0	1	0	0	0	0	0	0	1	1	1	0
Mytilinidion resinicola	GCA_010093595.1	47275052	16792	574789	Fungi	Ascomycota	Dothideomycetes	Mytilinidiales	Mytilinidiaceae	Mytilinidion	1	1	1	1	1	1	1	0	0	0	0	0	8	1	1	0	2	2	1	1	1	0	0	0	1	0	1	2	1	0
Nadsonia fulvescens	GCA_001661315.1	13746944	5648	45786	Fungi	Ascomycota	Saccharomycetes	Saccharomycetales	NA	Nadsonia	0	1	1	1	1	0	1	0	0	0	0	0	0	0	0	0	0	0	1	0	1	0	0	0	0	0	1	2	1	0
Naematelia encephala	GCA_002105065.1	19786307	7964	71784	Fungi	Basidiomycota	Tremellomycetes	Tremellales	Naemateliaceae	Naematelia	1	1	1	1	1	0	1	0	0	1	0	0	0	1	0	0	0	0	0	1	1	0	0	0	0	0	1	1	1	2
Naganishia albida	GCA_024322255.1	20667795	6607	100951	Fungi	Basidiomycota	Tremellomycetes	Filobasidiales	Filobasidiaceae	Naganishia	1	1	0	1	1	0	1	0	0	0	0	0	0	1	0	0	0	0	0	1	0	0	0	0	0	0	1	0	0	0
Naganishia liquefaciens	GCA_013423385.1	19492980	6883	104408	Fungi	Basidiomycota	Tremellomycetes	Filobasidiales	Filobasidiaceae	Naganishia	1	1	1	1	1	0	1	0	0	1	0	0	0	1	0	0	0	0	0	1	0	0	0	0	0	0	1	1	1	0
Naganishia onofrii	GCA_030039215.1	23784507	6962	1851511	Fungi	Basidiomycota	Tremellomycetes	Filobasidiales	Filobasidiaceae	Naganishia	1	1	0	1	1	0	0	0	0	0	0	0	0	0	0	0	0	0	0	1	0	0	0	0	0	0	1	0	1	0
Nakaseomyces glabratus	GCA_000002545.2	12318245	5202	5478	Fungi	Ascomycota	Saccharomycetes	Saccharomycetales	Saccharomycetaceae	Nakaseomyces	0	1	1	0	2	0	0	0	0	0	0	0	0	0	0	0	0	0	1	0	1	0	0	0	0	0	1	1	0	1
Nannizzia gypsea	GCA_000150975.2	23272942	8921	63402	Fungi	Ascomycota	Eurotiomycetes	Onygenales	Arthrodermataceae	Nannizzia	1	1	1	1	1	0	1	1	0	0	0	0	2	1	0	0	1	1	0	0	0	0	0	0	0	0	1	1	0	0
Naumovozyma castellii	GCA_000237345.1	11219539	5592	27288	Fungi	Ascomycota	Saccharomycetes	Saccharomycetales	Saccharomycetaceae	Naumovozyma	0	1	1	0	2	0	0	0	0	0	0	0	0	0	0	0	0	0	1	0	1	0	0	0	0	0	1	2	0	0
Naumovozyma dairenensis	GCA_000227115.2	13527580	5548	27289	Fungi	Ascomycota	Saccharomycetes	Saccharomycetales	Saccharomycetaceae	Naumovozyma	0	1	1	0	2	0	0	0	0	0	0	0	0	0	0	0	0	0	1	0	1	0	0	0	0	0	1	2	0	1
Nemania abortiva	GCA_022578505.1	49607496	14125	561989	Fungi	Ascomycota	Sordariomycetes	Xylariales	Xylariaceae	Nemania	1	1	1	1	1	1	1	0	0	0	0	0	4	2	4	0	1	1	0	0	0	0	0	0	0	0	1	1	2	0
Nemania diffusa	GCA_022578665.1	51522393	12570	389665	Fungi	Ascomycota	Sordariomycetes	Xylariales	Xylariaceae	Nemania	1	1	1	1	1	1	1	0	0	0	0	0	4	2	2	0	1	1	0	0	0	0	0	0	0	0	1	1	2	0
Nemania serpens	GCA_022578675.1	43199662	10924	109381	Fungi	Ascomycota	Sordariomycetes	Xylariales	Xylariaceae	Nemania	1	1	1	1	1	1	1	0	0	0	0	0	4	2	3	0	0	1	1	0	0	0	0	0	0	0	1	1	1	0
Nematocida ausubeli	GCA_000250695.1	4700711	2770	1913371	Fungi	Microsporidia	NA	NA	NA	Nematocida	0	0	0	0	1	0	0	0	0	0	0	0	0	0	0	0	0	0	0	0	0	0	0	0	0	0	0	0	0	0
Nematocida parisii	GCA_000190615.1	4147597	2726	586133	Fungi	Microsporidia	NA	NA	NA	Nematocida	0	1	0	0	0	0	0	0	0	0	0	0	0	0	0	0	0	0	0	0	0	0	0	0	0	0	0	0	0	0
Neoantrodia serialis	GCA_022376445.1	66694225	17406	139415	Fungi	Basidiomycota	Agaricomycetes	Polyporales	Fomitopsidaceae	Antrodia	2	3	1	1	0	0	0	0	0	0	0	0	2	2	0	3	3	0	1	1	1	1	0	0	0	0	1	1	0	1
Neoarthrinium moseri	GCA_022829195.1	44394130	14161	1658444	Fungi	Ascomycota	Sordariomycetes	Microascales	Microascaceae	Wardomyces	1	1	1	1	1	1	1	0	0	0	0	0	8	2	6	0	0	1	0	0	0	0	0	0	0	0	1	1	2	0
Neocallimastix californiae	GCA_002104975.1	193032486	20200	1754190	Fungi	Chytridiomycota	Neocallimastigomycetes	Neocallimastigales	Neocallimastigaceae	Neocallimastix	2	2	1	1	1	0	2	0	0	0	3	0	0	4	0	0	0	0	0	0	0	4	1	1	0	0	1	0	0	0
Neoconidiobolus thromboides	GCA_025603075.1	24635576	8866	76012	Fungi	Zoopagomycota	Entomophthoromycetes	Entomophthorales	Ancylistaceae	Neoconidiobolus	2	1	1	1	0	0	0	1	1	0	0	0	0	2	0	0	0	0	0	0	0	0	0	0	0	0	0	0	1	1
Neocucurbitaria cava	GCA_027946455.1	34846001	10938	798079	Fungi	Ascomycota	Dothideomycetes	Pleosporales	Cucurbitariaceae	Neocucurbitaria	0	1	1	1	1	1	0	0	0	0	0	0	3	1	4	0	3	0	1	0	0	0	0	0	1	0	2	1	0	0
Neofusicoccum parvum	GCA_000385595.1	42592847	10366	310453	Fungi	Ascomycota	Dothideomycetes	Botryosphaeriales	Botryosphaeriaceae	Neofusicoccum	1	1	1	1	1	0	1	0	0	0	0	0	1	1	0	0	0	1	0	0	0	0	0	0	0	0	1	0	1	0
Neohortaea acidophila	GCA_010093505.1	20432448	9829	245834	Fungi	Ascomycota	Dothideomycetes	Mycosphaerellales	Teratosphaeriaceae	Neohortaea	1	1	1	1	1	1	1	1	0	0	0	0	5	1	0	0	2	1	1	1	0	0	0	0	0	0	1	0	1	0
Neolecta irregularis	GCA_001929475.1	14182604	5531	48691	Fungi	Ascomycota	Neolectomycetes	Neolectales	Neolectaceae	Neolecta	1	1	1	1	0	0	0	1	0	0	0	0	0	2	0	0	0	0	0	0	0	0	0	0	0	0	1	0	0	0
Neolentinus lepideus	GCA_001632425.1	35640188	13155	38799	Fungi	Basidiomycota	Agaricomycetes	Gloeophyllales	Gloeophyllaceae	Neolentinus	2	1	1	1	1	1	0	0	0	0	0	0	0	2	0	0	0	0	1	1	1	1	0	0	0	0	1	0	0	0
Neonectria ditissima	GCA_001306435.1	45719213	12685	78410	Fungi	Ascomycota	Sordariomycetes	Hypocreales	Nectriaceae	Neonectria	1	1	1	1	1	1	1	0	0	0	0	0	4	1	1	0	2	1	0	0	0	0	0	0	0	0	1	0	1	0
Neopestalotiopsis clavispora	GCA_014621435.1	50463625	15199	289240	Fungi	Ascomycota	Sordariomycetes	Xylariales	Sporocadaceae	Neopestalotiopsis	1	1	1	1	1	1	1	0	0	0	0	0	4	1	3	0	0	1	0	0	0	0	0	0	0	0	1	1	2	0
Neurospora crassa	GCA_000182925.2	41102378	9758	5141	Fungi	Ascomycota	Sordariomycetes	Sordariales	Sordariaceae	Neurospora	1	1	1	1	1	1	1	0	0	0	0	1	2	1	3	0	1	1	0	0	0	0	0	0	0	0	1	2	1	0
Neurospora tetrasperma	GCA_000213175.1	39146333	10380	40127	Fungi	Ascomycota	Sordariomycetes	Sordariales	Sordariaceae	Neurospora	1	1	1	1	1	1	1	0	0	0	0	1	2	1	2	0	1	1	0	0	0	0	0	0	0	0	1	2	1	0
Niorma chrysophthalma	GCA_023646055.1	27029361	8705	1445009	Fungi	Ascomycota	Lecanoromycetes	Teloschistales	Teloschistaceae	Niorma	1	1	1	1	1	0	1	0	0	0	0	0	0	1	0	0	1	1	0	0	0	0	0	0	0	0	0	1	0	0
Nosema apis	GCA_000447185.1	8569501	2764	35231	Fungi	Microsporidia	NA	NA	Nosematidae	Nosema	0	0	0	0	0	1	0	0	0	0	0	0	0	0	0	0	0	0	0	0	0	0	0	0	0	0	0	0	0	0
Nosema ceranae	GCA_000182985.1	7860219	2060	40302	Fungi	Microsporidia	NA	NA	Nosematidae	Nosema	0	0	0	0	0	1	0	0	0	0	0	0	0	0	0	0	0	0	0	0	0	0	0	0	0	0	0	0	0	0
Obba rivulosa	GCA_001687445.1	34037596	13198	1052685	Fungi	Basidiomycota	Agaricomycetes	Polyporales	Gelatoporiaceae	Obba	2	1	1	1	1	2	0	0	0	0	0	0	3	2	0	12	1	0	1	1	1	1	0	0	0	0	1	1	1	0
Obelidium mucronatum	GCA_025765595.1	49458483	15460	110081	Fungi	Chytridiomycota	Chytridiomycetes	Chytridiales	Chytriomycetaceae	Obelidium	0	1	1	1	0	0	1	1	0	1	0	0	2	1	1	0	1	0	3	0	1	0	1	0	0	0	0	9	1	0
Ogataea haglerorum	GCA_019206905.1	8863550	5402	1937702	Fungi	Ascomycota	Saccharomycetes	Saccharomycetales	Pichiaceae	Ogataea	0	1	1	0	1	0	0	0	0	0	0	0	0	1	0	0	0	0	0	0	0	0	0	0	0	0	1	1	1	0
Ogataea parapolymorpha	GCA_000187245.3	8874589	5325	1005962	Fungi	Ascomycota	Saccharomycetes	Saccharomycetales	Pichiaceae	Ogataea	0	1	1	0	1	0	0	0	0	0	0	0	0	1	0	0	0	0	0	0	0	0	0	0	0	0	1	1	1	1
Ogataea polymorpha	GCA_001664045.1	8974371	5171	460523	Fungi	Ascomycota	Saccharomycetes	Saccharomycetales	Pichiaceae	Ogataea	0	1	0	0	1	0	0	0	0	0	0	0	0	1	0	0	0	0	0	0	0	0	0	0	0	0	1	1	1	1
Olpidium bornovanus	GCA_017911155.1	28244625	8460	278681	Fungi	Olpidiomycota	Olpidiomycetes	Olpidiales	Olpidiaceae	Olpidium	2	1	1	0	1	0	1	0	1	0	0	0	0	2	0	0	0	0	0	0	0	0	0	0	0	0	0	1	0	0
Ophidiomyces ophidiicola	GCA_022829765.1	21078914	6874	1387563	Fungi	Ascomycota	Eurotiomycetes	Onygenales	Onygenaceae	Ophidiomyces	1	1	1	1	1	0	1	1	0	0	0	0	2	1	0	0	0	1	0	0	0	0	0	0	0	0	1	1	1	0
Ophiobolus disseminans	GCA_010093685.1	41683814	16026	1469910	Fungi	Ascomycota	Dothideomycetes	Pleosporales	Leptosphaeriaceae	Ophiobolus	1	1	1	1	1	1	1	0	0	0	0	0	6	1	5	0	3	1	1	1	0	0	0	0	1	0	2	1	1	0
Ophiocordyceps polyrhachis-furcata	GCA_001633055.2	43252821	8836	1330020	Fungi	Ascomycota	Sordariomycetes	Hypocreales	Ophiocordycipitaceae	Ophiocordyceps	1	1	1	1	1	1	1	0	0	0	0	0	1	1	0	0	0	1	0	0	0	0	0	0	0	0	1	0	1	0
Ophiocordyceps sinensis	GCA_000448365.1	78515811	6972	72228	Fungi	Ascomycota	Sordariomycetes	Hypocreales	Ophiocordycipitaceae	Ophiocordyceps	1	1	1	1	1	1	1	0	0	0	0	0	0	1	2	0	1	1	0	0	0	0	0	0	0	0	1	0	0	0
Ophiocordyceps unilateralis	GCA_001272575.2	23913698	8577	268505	Fungi	Ascomycota	Sordariomycetes	Hypocreales	Ophiocordycipitaceae	Ophiocordyceps	1	1	1	1	1	1	1	0	0	0	0	0	1	1	1	0	1	1	0	0	0	0	0	0	0	0	1	1	1	0
Ophiostoma piceae	GCA_000410735.1	32840360	8884	61273	Fungi	Ascomycota	Sordariomycetes	Ophiostomatales	Ophiostomataceae	Ophiostoma	1	1	1	1	1	1	1	0	0	0	0	0	2	1	3	0	0	1	0	0	0	0	0	0	0	0	1	0	1	0
Orbilia oligospora	GCA_000225545.1	40072829	11479	2813651	Fungi	Ascomycota	Orbiliomycetes	Orbiliales	Orbiliaceae	Orbilia	1	1	1	1	1	1	1	2	1	0	0	0	2	1	0	0	3	1	0	0	0	0	0	0	0	0	1	2	1	0
Ordospora colligata	GCA_000803265.1	2290528	1820	174685	Fungi	Microsporidia	NA	NA	Ordosporidae	Ordospora	0	0	0	0	0	1	0	0	0	0	0	0	0	0	0	0	0	0	0	0	0	0	0	0	0	0	0	0	0	0
Pachysolen tannophilus	GCA_001661245.1	12596242	5664	4918	Fungi	Ascomycota	Saccharomycetes	Saccharomycetales	NA	Pachysolen	0	1	1	1	1	0	1	0	0	0	0	0	0	1	0	0	0	0	1	0	1	0	0	0	0	0	1	1	1	0
Paecilomyces variotii	GCA_000497085.1	29762401	8877	264951	Fungi	Ascomycota	Eurotiomycetes	Eurotiales	Thermoascaceae	Paecilomyces	1	1	1	1	1	0	1	0	0	0	0	0	1	1	1	0	1	1	0	0	0	0	0	0	0	0	1	0	1	0
Panaeolus cyanescens	GCA_002938355.1	44310526	13420	181874	Fungi	Basidiomycota	Agaricomycetes	Agaricales	Bolbitiaceae	Panaeolus	1	1	1	1	0	1	0	1	0	0	0	0	1	2	0	3	0	0	1	1	1	1	0	0	0	0	1	1	0	1
Panaeolus papilionaceus	GCA_015501605.1	50889730	17465	330517	Fungi	Basidiomycota	Agaricomycetes	Agaricales	Bolbitiaceae	Panaeolus	2	1	1	1	1	2	0	1	0	0	0	0	0	2	0	3	0	0	1	1	1	1	0	0	0	0	1	1	0	0
Pancytospora epiphaga	GCA_024243955.1	4594902	2966	1938578	Fungi	Microsporidia	NA	NA	NA	Pancytospora	0	1	0	0	0	1	0	0	0	0	0	0	0	0	0	0	0	0	0	0	0	0	0	0	0	0	0	0	0	0
Pancytospora philotis	GCA_023647555.1	4226696	2836	1923975	Fungi	Microsporidia	NA	NA	NA	Pancytospora	0	1	0	0	0	1	0	0	0	0	0	0	0	0	0	0	0	0	0	0	0	0	0	0	0	0	0	0	0	0
Panus rudis	GCA_022160315.1	36358364	13569	48022	Fungi	Basidiomycota	Agaricomycetes	Polyporales	Panaceae	Panus	1	1	1	1	0	2	0	1	1	0	0	0	2	2	0	6	0	0	1	1	1	1	0	0	0	0	1	1	1	0
Paracoccidioides brasiliensis	GCA_000150475.2	29062735	8427	121759	Fungi	Ascomycota	Eurotiomycetes	Onygenales	NA	Paracoccidioides	1	1	1	1	1	0	1	1	0	0	0	0	2	1	0	0	0	1	0	0	0	0	0	0	0	0	1	0	1	0
Paracoccidioides lutzii	GCA_000150705.2	32925248	8826	1048829	Fungi	Ascomycota	Eurotiomycetes	Onygenales	NA	Paracoccidioides	1	1	1	1	1	0	1	1	0	0	0	0	2	1	0	0	0	1	0	0	0	0	0	0	0	0	1	0	1	0
Paraglomus brasilianum	GCA_910592345.1	58473107	11842	144538	Fungi	Mucoromycota	Glomeromycetes	Paraglomerales	Paraglomeraceae	Paraglomus	2	2	1	1	1	1	1	0	0	1	1	0	0	2	0	0	1	0	0	0	0	1	0	0	0	0	0	1	1	0
Paraglomus occultum	GCA_910592205.1	50060206	11385	144539	Fungi	Mucoromycota	Glomeromycetes	Paraglomerales	Paraglomeraceae	Paraglomus	1	2	1	1	1	0	1	0	0	1	1	0	0	2	0	0	0	0	0	0	0	1	0	1	0	0	1	1	1	0
Paramicrosporidium saccamoebae	GCA_002794465.1	7191472	3766	1246581	Fungi	Cryptomycota	NA	NA	NA	Paramicrosporidium	1	2	0	0	1	0	0	0	0	0	0	0	0	0	0	0	0	0	0	0	0	0	0	0	0	0	0	0	0	0
Paramyrothecium foliicola	GCA_023375755.1	47288662	13330	1859967	Fungi	Ascomycota	Sordariomycetes	Hypocreales	Stachybotryaceae	Paramyrothecium	1	1	1	1	1	1	1	0	0	0	0	0	3	1	1	0	0	1	0	0	0	0	0	0	0	0	1	1	2	0
Paraphaeosphaeria minitans	GCA_015832175.1	47922910	13677	565426	Fungi	Ascomycota	Dothideomycetes	Pleosporales	Didymosphaeriaceae	Paraphaeosphaeria	1	1	2	1	1	0	1	0	1	0	0	0	7	1	4	0	3	1	1	1	0	0	0	0	0	0	1	1	1	0
Paraphaeosphaeria sporulosa	GCA_001642045.1	38464024	14734	1460663	Fungi	Ascomycota	Dothideomycetes	Pleosporales	Didymosphaeriaceae	Paraphaeosphaeria	1	1	1	1	1	0	1	0	1	0	0	0	9	1	4	0	2	1	1	1	0	0	0	0	0	0	1	3	1	0
Paraphoma chrysanthemicola	GCA_020744215.1	40162222	15008	798071	Fungi	Ascomycota	Dothideomycetes	Pleosporales	Phaeosphaeriaceae	Paraphoma	1	1	3	1	1	1	1	0	0	0	0	0	5	1	5	0	1	1	1	1	0	0	0	0	1	0	2	1	1	0
Paraphysoderma sedebokerense	GCA_025602915.1	27876074	10850	1500003	Fungi	Blastocladiomycota	Physodermatomycetes	Physodermatales	Physodermataceae	Paraphysoderma	3	1	1	1	1	1	1	2	0	0	2	0	0	3	0	0	2	0	1	0	0	2	1	0	0	0	0	1	0	0
Parascedosporium putredinis	GCA_938049765.3	39039452	9713	1442378	Fungi	Ascomycota	Sordariomycetes	Microascales	Microascaceae	Parascedosporium	2	1	0	0	1	1	1	0	0	0	0	0	1	1	8	0	1	0	0	0	0	0	0	0	1	0	1	0	0	0
Parasitella parasitica	GCA_000938895.1	44910645	13408	35722	Fungi	Mucoromycota	Mucoromycetes	Mucorales	Mucoraceae	Parasitella	1	1	2	1	2	0	1	2	1	0	0	0	0	4	0	0	0	0	0	1	1	2	0	0	0	1	1	2	1	0
Parastagonospora nodorum	GCA_000146915.2	37213987	16002	13684	Fungi	Ascomycota	Dothideomycetes	Pleosporales	Phaeosphaeriaceae	Parastagonospora	1	1	1	1	1	2	1	1	0	0	0	0	6	0	2	0	1	1	1	1	0	0	0	0	1	0	1	1	1	0
Patellaria atrata	GCA_010093705.1	28693344	9779	703506	Fungi	Ascomycota	Dothideomycetes	Patellariales	Patellariaceae	Patellaria	1	1	1	1	1	1	1	0	0	0	0	0	2	1	4	0	2	2	1	1	0	0	0	0	0	0	1	1	1	0
Paxillus ammoniavirescens	GCA_014904835.1	35762581	13467	1132860	Fungi	Basidiomycota	Agaricomycetes	Boletales	Paxillaceae	Paxillus	2	1	1	1	0	2	0	0	0	0	0	0	0	2	0	0	0	0	1	1	1	1	0	0	0	0	1	0	0	0
Paxillus involutus	GCA_000827475.1	58300722	17910	71150	Fungi	Basidiomycota	Agaricomycetes	Boletales	Paxillaceae	Paxillus	3	1	1	1	0	1	0	0	0	0	0	0	0	2	0	0	0	0	1	1	1	1	0	0	0	0	1	0	0	0
Paxillus rubicundulus	GCA_000827395.1	53011005	22033	463315	Fungi	Basidiomycota	Agaricomycetes	Boletales	Paxillaceae	Paxillus	2	1	1	1	0	1	0	0	1	0	0	0	0	2	0	0	0	0	1	1	1	1	0	0	0	0	1	0	0	0
Peltaster fructicola	GCA_001592805.2	18987130	8072	286661	Fungi	Ascomycota	Dothideomycetes	NA	NA	Peltaster	0	1	1	1	1	1	1	0	0	0	0	0	0	0	0	0	0	2	1	1	0	0	0	0	0	0	1	0	1	0
Peltigera leucophlebia	GCA_022814155.1	44693606	8197	52883	Fungi	Ascomycota	Lecanoromycetes	Peltigerales	Peltigeraceae	Peltigera	2	3	1	1	1	0	0	0	0	0	0	0	0	1	0	0	2	2	0	0	0	0	0	0	0	0	1	0	0	0
Penicilliopsis zonata	GCA_001890105.1	26088231	9869	41063	Fungi	Ascomycota	Eurotiomycetes	Eurotiales	Aspergillaceae	Penicilliopsis	1	1	1	1	1	0	1	0	0	0	0	0	1	1	0	0	1	2	0	0	0	0	0	0	0	0	1	0	2	0
Penicillium digitatum	GCA_000315645.2	26082141	8961	36651	Fungi	Ascomycota	Eurotiomycetes	Eurotiales	Aspergillaceae	Penicillium	1	1	1	1	1	0	1	0	0	0	0	0	1	1	0	0	0	2	1	0	0	0	0	0	0	0	1	0	1	0
Penicillium rubens	GCA_000226395.1	32223735	12792	1108849	Fungi	Ascomycota	Eurotiomycetes	Eurotiales	Aspergillaceae	Penicillium	1	1	1	1	1	0	1	0	0	0	0	0	1	1	0	0	2	2	1	0	0	0	0	0	0	0	1	0	0	0
Periconia digitata	GCA_948474695.1	39023295	15520	1303443	Fungi	Ascomycota	Dothideomycetes	Pleosporales	Periconiaceae	Periconia	1	1	2	1	1	1	1	0	1	0	0	0	4	1	4	0	2	1	1	1	0	0	0	0	0	0	1	0	1	0
Periconia macrospinosa	GCA_003073855.1	54992973	18735	97972	Fungi	Ascomycota	Dothideomycetes	Pleosporales	Periconiaceae	Periconia	1	1	1	2	1	1	2	0	1	0	0	0	6	1	4	0	3	1	1	1	0	0	0	0	0	0	1	1	1	0
Pestalotiopsis fici	GCA_000516985.1	51910726	15413	393283	Fungi	Ascomycota	Sordariomycetes	Xylariales	Sporocadaceae	Pestalotiopsis	1	1	1	1	1	1	1	0	0	0	0	0	5	2	3	0	0	1	1	0	0	0	0	0	0	0	1	1	2	0
Peziza echinospora	GCA_024516245.1	63768826	10990	61495	Fungi	Ascomycota	Pezizomycetes	Pezizales	Pezizaceae	Peziza	1	1	1	1	0	1	1	0	0	0	0	0	0	1	0	0	0	1	0	1	0	0	0	0	1	0	1	1	1	0
Phaeoacremonium minimum	GCA_000392275.1	47465449	8834	223192	Fungi	Ascomycota	Sordariomycetes	Togniniales	Togniniaceae	Phaeoacremonium	0	1	1	1	0	1	1	0	0	0	0	0	1	1	1	0	2	1	0	0	0	0	0	0	0	0	1	0	1	0
Phaeomoniella chlamydospora	GCA_001006345.1	27513354	6907	158046	Fungi	Ascomycota	Eurotiomycetes	Phaeomoniellales	Phaeomoniellaceae	Phaeomoniella	1	1	1	1	1	1	1	0	1	0	0	0	0	1	0	0	0	0	0	0	0	0	0	0	0	0	1	0	0	0
Phaffia rhodozyma	GCA_001007165.2	19519467	6380	264483	Fungi	Basidiomycota	Tremellomycetes	Cystofilobasidiales	Mrakiaceae	Phaffia	0	1	1	1	1	0	1	0	0	0	0	0	2	2	0	0	5	0	0	0	0	0	0	0	0	0	1	0	0	1
Phakopsora pachyrhizi	GCA_025201825.1	1057430280	19617	170000	Fungi	Basidiomycota	Pucciniomycetes	Pucciniales	Phakopsoraceae	Phakopsora	1	1	1	2	1	0	1	0	0	1	0	0	2	1	6	0	0	0	0	0	1	0	0	0	0	0	1	2	1	0
Phanerochaete carnosa	GCA_000300595.1	46293325	13925	231932	Fungi	Basidiomycota	Agaricomycetes	Polyporales	Phanerochaetaceae	Phanerochaete	1	1	1	1	1	1	0	0	0	0	0	0	4	2	0	0	0	0	1	0	1	1	0	0	0	0	1	0	0	0
Phanerochaete sordida	GCA_019973155.2	41343802	17158	48140	Fungi	Basidiomycota	Agaricomycetes	Polyporales	Phanerochaetaceae	Phanerochaete	2	1	1	1	1	2	0	1	0	0	0	0	3	2	0	1	0	0	1	1	1	1	0	0	0	0	1	1	1	0
Phascolomyces articulosus	GCA_025677815.1	47605836	14492	60185	Fungi	Mucoromycota	Mucoromycetes	Mucorales	Lichtheimiaceae	Phascolomyces	2	1	1	1	1	0	1	1	1	0	0	0	0	4	0	0	0	0	1	1	1	2	1	0	0	1	1	1	1	0
Phellinidium pouzarii	GCA_004802695.1	28590294	8701	167371	Fungi	Basidiomycota	Agaricomycetes	Hymenochaetales	Hymenochaetaceae	Phellinidium	2	1	1	1	1	0	0	0	0	0	0	0	0	2	0	0	2	0	0	1	1	1	0	0	0	0	1	0	0	0
Phellopilus nigrolimitatus	GCA_021029095.1	56764883	14792	127956	Fungi	Basidiomycota	Agaricomycetes	Hymenochaetales	Hymenochaetaceae	Phellopilus	1	2	1	1	1	2	0	0	0	0	0	0	1	2	0	4	1	0	1	1	0	1	0	0	0	0	1	1	0	0
Phialocephala subalpina	GCA_900073065.1	69693031	20173	576137	Fungi	Ascomycota	Leotiomycetes	Helotiales	Mollisiaceae	Phialocephala	1	1	1	1	1	1	2	0	1	0	0	0	17	5	2	0	4	5	0	1	0	0	0	0	0	0	1	1	1	0
Phialophora attinorum	GCA_001299255.1	30363635	11848	1664694	Fungi	Ascomycota	Eurotiomycetes	Chaetothyriales	Herpotrichiellaceae	Phialophora	1	1	1	1	0	1	1	0	0	0	0	0	1	1	1	0	0	0	1	0	0	0	0	0	0	0	1	0	1	0
Phialophora macrospora	GCA_000835435.1	31616172	10919	1851006	Fungi	Ascomycota	Eurotiomycetes	Chaetothyriales	Herpotrichiellaceae	Phialophora	1	1	1	1	1	1	1	0	0	0	0	0	1	2	3	0	0	0	0	1	0	0	0	0	0	0	1	0	1	0
Phlebia brevispora	GCA_027627325.1	28652608	9452	194682	Fungi	Basidiomycota	Agaricomycetes	Polyporales	Meruliaceae	Phlebia	2	1	1	1	0	2	0	0	0	0	0	0	2	2	0	1	0	0	1	1	0	0	0	0	0	0	1	0	0	0
Phlebiopsis gigantea	GCA_000832265.1	30143925	11855	82310	Fungi	Basidiomycota	Agaricomycetes	Polyporales	Phanerochaetaceae	Phlebiopsis	2	1	1	1	1	2	0	1	0	0	0	0	4	2	0	0	0	0	1	1	1	1	0	0	0	0	1	0	1	0
Phlegmacium glaucopus	GCA_015039465.1	63450306	20328	171480	Fungi	Basidiomycota	Agaricomycetes	Agaricales	Cortinariaceae	Cortinarius	2	1	1	3	1	2	0	0	1	0	0	0	2	2	0	7	0	0	1	0	1	1	0	0	0	0	1	0	0	0
Phlyctochytrium arcticum	GCA_025602905.1	31548172	10962	1117335	Fungi	Chytridiomycota	Chytridiomycetes	Chytridiales	Chytridiaceae	Phlyctochytrium	0	1	2	1	0	1	1	1	0	0	1	0	0	3	3	0	1	0	2	0	0	1	0	0	0	0	0	1	1	1
Phlyctochytrium bullatum	GCA_027597005.1	40192336	11036	1352834	Fungi	Chytridiomycota	Chytridiomycetes	Chytridiales	Chytridiaceae	Phlyctochytrium	0	0	0	0	0	0	1	2	1	1	2	0	0	1	0	0	0	0	1	0	0	0	2	0	0	0	0	2	0	0
Phlyctochytrium planicorne	GCA_027600675.1	30010325	10408	261098	Fungi	Chytridiomycota	Chytridiomycetes	Chytridiales	Chytridiaceae	Phlyctochytrium	0	0	1	1	0	0	1	1	0	0	0	0	0	3	0	0	0	0	2	0	1	0	1	0	0	0	0	2	1	0
Pholiota conissans	GCA_015484465.1	43955553	16587	109636	Fungi	Basidiomycota	Agaricomycetes	Agaricales	Strophariaceae	Pholiota	1	1	1	1	0	2	0	1	1	0	0	0	1	2	0	7	0	0	0	1	1	1	0	0	0	0	1	1	0	0
Pholiota molesta	GCA_014925825.1	66044324	17823	2066989	Fungi	Basidiomycota	Agaricomycetes	Agaricales	Strophariaceae	Pholiota	3	1	1	4	2	4	0	0	0	0	0	0	1	1	0	3	0	0	1	1	1	0	0	0	0	0	1	0	0	0
Phycomyces blakesleeanus	GCA_001638985.2	53939167	16542	4837	Fungi	Mucoromycota	Mucoromycetes	Mucorales	Phycomycetaceae	Phycomyces	1	2	1	1	1	0	1	2	1	0	0	0	0	3	0	0	0	0	1	1	1	1	0	1	0	0	0	1	1	0
Phycomyces nitens	GCA_025531835.1	37678874	11979	269771	Fungi	Mucoromycota	Mucoromycetes	Mucorales	Phycomycetaceae	Phycomyces	1	2	2	2	1	0	1	1	1	0	0	0	0	2	0	0	0	0	0	1	1	0	1	1	0	1	1	2	1	0
Phylliscum demangeonii	GCA_026026795.1	25161064	7744	318774	Fungi	Ascomycota	Lichinomycetes	Lichinales	Lichinaceae	Phylliscum	1	1	1	1	0	1	1	0	0	0	0	0	0	1	0	0	0	0	0	0	0	0	0	0	0	0	0	0	1	0
Physcia stellaris	GCA_018902385.1	44010370	10217	116821	Fungi	Ascomycota	Lecanoromycetes	Caliciales	Physciaceae	Physcia	1	1	1	1	1	0	1	0	0	0	0	0	5	1	0	0	0	1	2	0	0	0	0	0	0	0	1	2	1	0
Physisporinus lineatus	GCA_027627245.1	46923322	13285	2056292	Fungi	Basidiomycota	Agaricomycetes	Polyporales	Meripilaceae	Physisporinus	0	1	0	0	0	1	0	1	0	0	0	0	2	0	0	0	0	0	0	1	1	1	0	0	0	0	1	0	0	0
Physocladia obscura	GCA_027596945.1	44089900	12792	109957	Fungi	Chytridiomycota	Chytridiomycetes	Chytridiales	Chytriomycetaceae	Physocladia	1	1	1	2	0	0	1	1	1	0	0	0	1	2	1	0	0	0	1	0	1	0	0	0	0	0	0	3	1	0
Pichia kudriavzevii	GCA_000764455.1	12940563	7107	4909	Fungi	Ascomycota	Saccharomycetes	Saccharomycetales	Pichiaceae	Pichia	0	1	1	0	1	0	0	0	0	0	0	0	0	0	0	0	0	0	0	0	0	0	0	0	0	0	2	0	1	0
Pichia membranifaciens	GCA_001661235.1	11582150	5542	4926	Fungi	Ascomycota	Saccharomycetes	Saccharomycetales	Pichiaceae	Pichia	0	1	1	0	1	0	0	0	0	0	0	0	0	1	0	0	0	0	0	0	0	0	0	0	0	0	1	0	1	0
Piedraia hortae	GCA_010093745.1	16946159	7556	147573	Fungi	Ascomycota	Dothideomycetes	Capnodiales	Piedraiaceae	Piedraia	0	1	1	1	1	0	5	0	0	0	0	0	1	0	0	0	1	2	1	1	0	0	0	0	0	0	1	1	1	0
Pilaira anomala	GCA_025716855.1	34898111	12813	64641	Fungi	Mucoromycota	Mucoromycetes	Mucorales	Mucoraceae	Pilaira	0	2	2	2	2	0	1	2	1	0	0	0	0	3	0	0	0	0	1	1	1	1	0	0	0	1	1	2	1	0
Pilatotrama ljubarskyi	GCA_022385805.1	34004100	13178	2735509	Fungi	Basidiomycota	Agaricomycetes	Polyporales	NA	Pilatotrama	2	1	1	1	1	2	0	0	0	0	0	0	5	2	0	1	1	0	1	1	1	1	0	0	0	0	1	1	0	1
Pilobolus umbonatus	GCA_025528865.1	34772712	10981	101123	Fungi	Mucoromycota	Mucoromycetes	Mucorales	Pilobolaceae	Pilobolus	1	1	2	2	2	0	1	1	1	0	0	0	0	4	0	0	0	0	0	1	1	1	0	0	0	1	1	2	1	1
Piloderma croceum	GCA_000827315.1	59326866	21519	80663	Fungi	Basidiomycota	Agaricomycetes	Atheliales	Atheliaceae	Piloderma	4	1	1	1	0	2	0	0	1	0	0	0	3	2	0	2	3	0	0	0	1	1	0	0	0	0	1	0	0	0
Piptocephalis cylindrospora	GCA_003614145.1	10748482	4301	1907219	Fungi	Zoopagomycota	Zoopagomycetes	Zoopagales	Piptocephalidaceae	Piptocephalis	1	0	0	0	1	0	0	1	0	0	1	0	0	2	0	0	0	0	0	0	0	0	0	0	0	0	0	0	1	0
Piptocephalis tieghemiana	GCA_025603285.1	18550337	5811	1286916	Fungi	Zoopagomycota	Zoopagomycetes	Zoopagales	Piptocephalidaceae	Piptocephalis	2	1	1	0	0	0	1	1	0	1	0	0	0	1	0	0	0	0	0	0	1	1	0	0	0	0	1	0	0	0
Piromyces finnis	GCA_002104945.1	56455805	10959	1754191	Fungi	Chytridiomycota	Neocallimastigomycetes	Neocallimastigales	Neocallimastigaceae	Piromyces	1	1	1	1	0	0	1	0	0	0	3	0	0	3	0	0	0	0	0	0	0	2	1	1	0	0	1	1	0	0
Pisolithus microcarpus	GCA_000827275.1	53027657	20975	178872	Fungi	Basidiomycota	Agaricomycetes	Boletales	Pisolithaceae	Pisolithus	2	1	1	1	0	2	0	0	1	0	0	0	0	1	0	0	0	0	1	1	1	1	0	0	0	0	1	0	1	0
Pisolithus orientalis	GCA_024613125.1	57997239	12203	936130	Fungi	Basidiomycota	Agaricomycetes	Boletales	Pisolithaceae	Pisolithus	2	1	1	1	0	2	0	0	1	0	0	0	0	2	0	0	0	0	1	1	1	1	0	0	0	0	1	0	1	0
Pisolithus tinctorius	GCA_000827335.1	71007534	22650	37468	Fungi	Basidiomycota	Agaricomycetes	Boletales	Pisolithaceae	Pisolithus	3	1	1	1	0	1	0	0	1	0	0	0	0	2	0	0	0	0	2	1	0	1	0	0	0	0	1	0	1	0
Plectosphaerella cucumerina	GCA_020746995.1	36520717	12955	40658	Fungi	Ascomycota	Sordariomycetes	Glomerellales	Plectosphaerellaceae	Plectosphaerella	1	1	1	1	1	1	1	0	0	0	0	0	3	1	5	0	4	1	0	0	0	0	0	0	0	0	1	2	1	0
Plectosphaerella plurivora	GCA_020726575.1	35930556	12457	936078	Fungi	Ascomycota	Sordariomycetes	Glomerellales	Plectosphaerellaceae	Plectosphaerella	1	1	1	1	1	1	1	0	0	0	0	0	3	1	5	0	4	1	0	0	0	0	0	0	0	0	1	1	1	0
Plenodomus lingam	GCA_000230375.1	45124619	12609	5022	Fungi	Ascomycota	Dothideomycetes	Pleosporales	Leptosphaeriaceae	Leptosphaeria	1	1	1	1	0	1	1	0	0	0	0	0	3	1	2	0	2	1	1	1	0	0	0	0	0	0	2	1	1	0
Plenodomus tracheiphilus	GCA_010093695.1	34242632	13204	1077377	Fungi	Ascomycota	Dothideomycetes	Pleosporales	Leptosphaeriaceae	Plenodomus	1	1	2	1	1	1	1	0	0	0	0	0	4	1	4	0	3	1	1	1	0	0	0	0	0	0	2	1	1	0
Pleomassaria siparia	GCA_010093715.1	43176591	13450	100044	Fungi	Ascomycota	Dothideomycetes	Pleosporales	Pleomassariaceae	Pleomassaria	1	1	1	1	1	0	1	0	1	0	0	0	6	1	4	0	0	1	1	1	0	0	0	0	1	0	1	1	1	0
Pleopsidium flavum	GCA_026027315.1	30780842	10810	318763	Fungi	Ascomycota	Lecanoromycetes	Acarosporales	Acarosporaceae	Pleopsidium	1	1	1	2	1	1	1	0	0	0	0	0	0	2	0	0	1	1	0	0	0	0	0	0	0	0	1	0	1	0
Pleurostoma richardsiae	GCA_030052745.1	39834950	12540	41990	Fungi	Ascomycota	Sordariomycetes	Calosphaeriales	Pleurostomataceae	Pleurostoma	1	1	1	1	1	1	1	0	0	0	0	1	2	2	2	0	1	1	0	0	0	0	0	0	0	0	1	1	1	0
Pleurotus ostreatoroseus	GCA_005298045.1	38588587	11296	2048520	Fungi	Basidiomycota	Agaricomycetes	Agaricales	Pleurotaceae	Pleurotus	0	1	1	1	1	0	0	0	0	0	0	0	2	0	0	1	0	0	0	1	1	1	0	0	0	0	1	1	0	0
Pleurotus ostreatus	GCA_000697685.1	34342730	12296	5322	Fungi	Basidiomycota	Agaricomycetes	Agaricales	Pleurotaceae	Pleurotus	2	1	1	2	1	2	0	0	1	0	0	0	1	3	0	4	0	0	1	1	1	1	0	0	0	0	1	1	1	1
Pleurotus pulmonarius	GCA_012979565.1	42552915	11873	28995	Fungi	Basidiomycota	Agaricomycetes	Agaricales	Pleurotaceae	Pleurotus	1	1	1	1	1	2	0	0	1	0	0	0	1	2	0	6	0	0	1	0	1	1	0	0	0	0	1	1	0	1
Plicaturopsis crispa	GCA_000827205.1	34498066	13616	139390	Fungi	Basidiomycota	Agaricomycetes	Amylocorticiales	Amylocorticiaceae	Plicaturopsis	2	1	1	3	0	2	0	1	0	0	0	0	2	2	0	7	2	0	1	1	1	1	0	0	0	0	1	1	0	0
Pluteus cervinus	GCA_004369065.1	52193021	19812	181527	Fungi	Basidiomycota	Agaricomycetes	Agaricales	Pluteaceae	Pluteus	2	1	1	4	0	2	0	0	1	0	0	0	1	2	0	7	0	0	1	1	1	1	0	0	0	0	1	1	1	0
Pneumocystis jirovecii	GCA_000333975.2	8179983	3537	42068	Fungi	Ascomycota	Pneumocystidomycetes	Pneumocystidales	Pneumocystidaceae	Pneumocystis	0	1	1	0	1	2	0	0	0	0	0	0	0	1	0	0	0	0	0	0	0	0	0	0	0	0	0	0	0	0
Pneumocystis murina	GCA_000349005.2	7501343	3623	263815	Fungi	Ascomycota	Pneumocystidomycetes	Pneumocystidales	Pneumocystidaceae	Pneumocystis	1	1	1	0	1	1	1	0	0	0	0	0	0	1	0	0	0	0	0	0	0	0	0	0	0	0	0	0	0	1
Pochonia chlamydosporia	GCA_001653235.2	44215803	14204	280754	Fungi	Ascomycota	Sordariomycetes	Hypocreales	Clavicipitaceae	Pochonia	1	1	1	1	1	1	1	0	0	0	0	0	2	1	1	0	2	1	0	0	0	0	0	0	0	0	1	1	2	0
Podila minutissima	GCA_015679485.1	39027290	11360	64525	Fungi	Mucoromycota	Mortierellomycetes	Mortierellales	Mortierellaceae	Podila	1	1	2	1	1	0	2	1	0	0	0	0	0	2	0	0	0	0	2	1	1	2	1	1	0	0	1	1	1	2
Podila verticillata	GCA_000739165.1	41912894	12483	78898	Fungi	Mucoromycota	Mortierellomycetes	Mortierellales	Mortierellaceae	Podila	1	1	3	1	1	0	2	0	0	0	0	0	0	2	0	0	1	0	2	1	1	2	1	2	0	0	1	1	1	2
Podosphaera aphanis	GCA_022627015.2	55605580	17239	79252	Fungi	Ascomycota	Leotiomycetes	Erysiphales	Erysiphaceae	Podosphaera	1	1	1	1	1	0	1	0	0	0	0	0	2	1	1	0	0	1	0	0	0	0	0	0	0	0	1	0	1	0
Podospora anserina	GCA_000226545.1	34718894	10548	2587412	Fungi	Ascomycota	Sordariomycetes	Sordariales	Podosporaceae	Podospora	1	1	1	1	1	1	1	0	0	0	0	1	2	2	7	0	2	1	0	0	0	0	0	0	0	0	1	2	1	0
Podospora comata	GCA_900290415.1	34385490	10448	48703	Fungi	Ascomycota	Sordariomycetes	Sordariales	Podosporaceae	Podospora	1	2	1	1	1	1	1	0	0	0	0	1	2	2	10	0	1	1	0	0	0	0	0	0	0	0	1	1	1	0
Polychaeton citri	GCA_010093785.1	27207581	10576	705562	Fungi	Ascomycota	Dothideomycetes	Capnodiales	Capnodiaceae	Polychaeton	1	1	1	1	1	1	1	0	0	0	0	0	2	0	0	0	1	2	1	1	0	0	0	0	0	0	1	0	1	0
Polychytrium aggregatum	GCA_025602895.1	64917104	10686	110093	Fungi	Chytridiomycota	Chytridiomycetes	Polychytriales	NA	Polychytrium	2	1	1	1	0	1	1	1	1	0	0	0	0	5	0	0	0	0	2	1	0	1	0	0	0	0	0	2	1	0
Polyplosphaeria fusca	GCA_010093805.1	37009770	15194	682080	Fungi	Ascomycota	Dothideomycetes	Pleosporales	Tetraplosphaeriaceae	Polyplosphaeria	1	2	1	1	1	1	1	0	0	0	0	0	4	1	5	0	2	1	1	1	0	0	0	0	0	0	1	1	1	0
Polyporus arcularius	GCA_004369055.1	43452342	17489	5639	Fungi	Basidiomycota	Agaricomycetes	Polyporales	Polyporaceae	Polyporus	2	1	1	2	1	1	0	0	0	0	0	0	2	2	0	10	2	0	1	1	1	1	0	0	0	0	1	0	1	2
Polyporus brumalis	GCA_003367725.1	45718144	18242	139420	Fungi	Basidiomycota	Agaricomycetes	Polyporales	Polyporaceae	Polyporus	2	1	1	1	2	3	0	0	0	0	0	0	2	2	0	10	2	0	1	2	1	1	0	0	0	0	1	0	1	2
Polyrhizophydium stewartii	GCA_027604665.1	23303880	8331	2732419	Fungi	Chytridiomycota	Chytridiomycetes	Rhizophydiales	NA	Polyrhizophydium	0	1	1	1	0	0	1	2	0	0	0	0	0	1	0	0	0	0	1	0	0	1	0	0	0	0	1	1	0	0
Polytolypa hystricis	GCA_002573605.1	34692036	9934	221428	Fungi	Ascomycota	Eurotiomycetes	Onygenales	Ajellomycetaceae	Polytolypa	1	1	1	1	1	0	1	1	0	0	0	0	4	1	0	0	0	2	0	0	0	0	0	0	0	0	1	0	1	0
Poronia punctata	GCA_022579005.1	47990914	9862	101475	Fungi	Ascomycota	Sordariomycetes	Xylariales	Xylariaceae	Poronia	1	1	1	1	1	1	1	0	0	0	0	0	3	1	1	0	1	1	0	0	0	0	0	0	0	0	1	0	2	0
Postia placenta	GCA_000006255.1	90891856	9083	104341	Fungi	Basidiomycota	Agaricomycetes	Polyporales	Dacryobolaceae	Postia	0	1	0	1	1	1	0	0	0	0	0	0	0	0	0	2	2	0	2	0	0	0	0	0	0	0	0	1	0	0
Powellomyces hirtus	GCA_006536005.1	26238698	6536	109895	Fungi	Chytridiomycota	Chytridiomycetes	Spizellomycetales	Powellomycetaceae	Powellomyces	0	1	1	1	0	0	1	2	0	1	0	0	0	3	0	0	0	0	2	0	0	0	0	0	0	0	0	2	0	1
Protomyces lactucae-debilis	GCA_002105105.1	12928838	6725	2754530	Fungi	Ascomycota	Taphrinomycetes	Taphrinales	Protomycetaceae	Protomyces	0	1	1	1	1	0	0	1	0	0	0	0	0	1	0	0	1	0	0	0	0	0	0	0	0	0	0	1	1	1
Pseudocercospora eumusae	GCA_001578235.1	47119461	10939	321146	Fungi	Ascomycota	Dothideomycetes	Mycosphaerellales	Mycosphaerellaceae	Pseudocercospora	1	1	2	1	1	1	1	0	0	0	0	0	7	0	0	0	2	2	1	1	0	0	0	0	0	0	1	1	1	0
Pseudocercospora fijiensis	GCA_000340215.1	74141167	13065	1873960	Fungi	Ascomycota	Dothideomycetes	Mycosphaerellales	Mycosphaerellaceae	Pseudocercospora	1	1	1	1	1	1	0	0	0	0	0	0	5	1	0	0	3	2	1	1	0	0	0	0	0	0	1	1	1	0
Pseudocercospora musae	GCA_001578225.1	60439160	10402	113226	Fungi	Ascomycota	Dothideomycetes	Mycosphaerellales	Mycosphaerellaceae	Pseudocercospora	0	1	2	1	1	1	1	0	0	0	0	0	3	0	0	0	1	2	1	1	0	0	0	0	0	0	1	0	1	0
Pseudocyphellaria aurata	GCA_022814125.1	42928881	9958	169141	Fungi	Ascomycota	Lecanoromycetes	Peltigerales	Lobariaceae	Pseudocyphellaria	1	1	1	1	1	0	1	0	0	0	0	0	0	2	0	0	2	0	0	0	0	0	0	0	0	0	1	0	1	0
Pseudogymnoascus destructans	GCA_000184105.1	30684937	9075	655981	Fungi	Ascomycota	Leotiomycetes	NA	Pseudeurotiaceae	Pseudogymnoascus	1	1	1	1	1	1	1	0	0	0	0	0	3	2	0	0	2	2	0	1	0	0	0	0	0	0	1	1	2	0
Pseudogymnoascus verrucosus	GCA_001662655.1	30174856	10685	342668	Fungi	Ascomycota	Leotiomycetes	NA	Pseudeurotiaceae	Pseudogymnoascus	1	1	1	1	1	1	1	0	0	0	0	0	3	3	0	0	2	1	0	1	0	0	0	0	0	0	1	1	1	0
Pseudohyphozyma bogoriensis	GCA_024364755.1	26004456	7847	106002	Fungi	Basidiomycota	Microbotryomycetes	NA	Chrysozymaceae	Pseudohyphozyma	1	0	0	1	1	1	1	0	0	0	0	0	3	1	0	3	1	0	1	1	0	0	0	0	0	0	1	0	0	0
Pseudoloma neurophilia	GCA_001432165.1	5248409	3644	146866	Fungi	Microsporidia	NA	NA	NA	Pseudoloma	0	2	0	0	0	1	0	0	0	0	0	0	0	0	0	0	0	0	0	0	0	0	0	0	0	0	0	0	0	0
Pseudomassariella vexata	GCA_002105095.1	44711451	12565	1141098	Fungi	Ascomycota	Sordariomycetes	Xylariales	Pseudomassariaceae	Pseudomassariella	1	2	1	1	1	1	1	0	0	0	0	0	6	2	5	0	2	1	0	0	0	0	0	0	0	0	1	0	1	0
Pseudomicrostroma glucosiphilum	GCA_003144135.1	17184282	6681	1684307	Fungi	Basidiomycota	Exobasidiomycetes	Microstromatales	NA	Pseudomicrostroma	2	1	1	1	1	0	1	1	0	1	0	0	0	1	0	0	1	0	0	1	1	0	0	0	0	0	1	1	0	0
Pseudovirgaria hyperparasitica	GCA_010093815.1	35440147	11229	470096	Fungi	Ascomycota	Dothideomycetes	Acrospermales	Acrospermaceae	Pseudovirgaria	1	1	1	1	1	0	1	0	0	0	0	0	7	1	1	0	2	1	1	1	0	0	0	0	0	0	1	2	3	0
Pseudozyma flocculosa	GCA_000417875.1	23305380	6877	84751	Fungi	Basidiomycota	Ustilaginomycetes	Ustilaginales	Ustilaginaceae	Pseudozyma	1	1	1	1	1	0	1	1	1	0	0	0	0	1	0	0	1	0	0	1	1	0	0	0	0	0	1	0	1	0
Pseudozyma hubeiensis	GCA_000403515.1	18442938	7472	327079	Fungi	Basidiomycota	Ustilaginomycetes	Ustilaginales	Ustilaginaceae	Pseudozyma	1	1	1	1	1	0	1	1	1	0	0	0	0	1	0	0	1	0	0	1	1	0	0	0	0	0	1	0	0	0
Psilocybe cf.	GCA_013368295.1	53019196	13686	2480587	Fungi	Basidiomycota	Agaricomycetes	Agaricales	Strophariaceae	Psilocybe	2	1	1	2	1	2	0	1	0	0	0	0	1	2	0	7	0	0	1	1	1	1	0	0	0	0	1	1	1	1
Psilocybe cubensis	GCA_017499595.2	46580944	13330	181762	Fungi	Basidiomycota	Agaricomycetes	Agaricales	Strophariaceae	Psilocybe	2	1	1	0	1	3	0	1	0	0	0	0	2	2	0	4	0	0	1	1	1	0	0	0	0	0	1	1	0	0
Psilocybe cyanescens	GCA_002938375.1	47465408	15936	93625	Fungi	Basidiomycota	Agaricomycetes	Agaricales	Strophariaceae	Psilocybe	1	1	1	1	1	2	0	0	0	0	0	0	1	2	0	5	0	0	1	1	1	1	0	0	0	0	1	1	0	1
Pterula gracilis	GCA_004369125.1	34769099	12872	1884261	Fungi	Basidiomycota	Agaricomycetes	Agaricales	Pterulaceae	Pterula	2	1	1	1	0	2	0	1	0	0	0	0	2	2	0	2	0	0	1	1	1	1	0	0	0	0	1	1	0	1
Ptychographa xylographoides	GCA_022814105.1	25544166	7741	223409	Fungi	Ascomycota	Lecanoromycetes	Trapeliales	Trapeliaceae	Ptychographa	0	1	1	2	1	1	1	0	0	0	0	0	0	1	0	0	0	2	0	0	0	0	0	0	0	0	1	0	1	0
Puccinia graminis	GCA_000149925.1	88724376	15800	5297	Fungi	Basidiomycota	Pucciniomycetes	Pucciniales	Pucciniaceae	Puccinia	2	1	1	1	1	1	1	1	0	0	0	0	1	1	11	0	0	0	0	0	1	0	0	0	0	0	1	1	2	0
Puccinia striiformis	GCA_001191645.1	117391083	19562	27350	Fungi	Basidiomycota	Pucciniomycetes	Pucciniales	Pucciniaceae	Puccinia	1	1	1	2	1	1	1	0	0	0	0	0	1	1	9	0	0	0	0	0	1	0	0	0	0	0	1	0	1	0
Puccinia triticina	GCA_000151525.2	135343689	14878	208348	Fungi	Basidiomycota	Pucciniomycetes	Pucciniales	Pucciniaceae	Puccinia	1	1	1	1	1	1	1	1	0	0	0	0	1	1	9	0	0	0	0	0	1	0	0	0	0	0	1	0	1	0
Punctularia strigosozonata	GCA_000264995.1	34171901	11540	202698	Fungi	Basidiomycota	Agaricomycetes	Corticiales	Punctulariaceae	Punctularia	2	1	1	1	0	2	0	0	0	0	0	0	0	2	0	0	0	0	1	1	1	1	0	0	0	0	1	1	0	0
Purpureocillium lilacinum	GCA_001653205.1	38140521	11773	33203	Fungi	Ascomycota	Sordariomycetes	Hypocreales	Ophiocordycipitaceae	Purpureocillium	1	1	1	1	1	1	1	0	0	0	0	0	1	1	1	0	0	1	0	0	0	0	0	0	0	0	1	0	1	0
Puttea exsequens	GCA_022814085.1	25964033	8469	2918520	Fungi	Ascomycota	Lecanoromycetes	Lecanorales	NA	Puttea	1	1	1	1	1	0	1	0	0	0	0	0	0	1	0	0	1	0	0	0	0	0	0	0	0	0	1	2	1	0
Pycnora praestabilis	GCA_026026765.1	24516431	7721	1453791	Fungi	Ascomycota	Candelariomycetes	Candelariales	Pycnoraceae	Pycnora	1	1	1	1	0	1	1	0	0	0	0	0	0	1	0	0	0	2	0	1	0	0	0	0	0	0	1	0	1	0
Pyrenophora seminiperda	GCA_000465215.2	32539172	8711	91370	Fungi	Ascomycota	Dothideomycetes	Pleosporales	Pleosporaceae	Pyrenophora	1	0	1	1	1	1	0	0	0	0	0	1	3	1	3	0	1	1	1	1	0	0	0	0	0	0	1	0	1	0
Pyrenophora teres	GCA_000166005.1	33583335	11799	53485	Fungi	Ascomycota	Dothideomycetes	Pleosporales	Pleosporaceae	Pyrenophora	1	1	1	1	1	1	1	0	0	0	0	1	4	1	4	0	2	1	1	1	0	0	0	0	0	0	1	0	1	0
Pyrenophora tritici-repentis	GCA_000149985.1	37997465	12169	45151	Fungi	Ascomycota	Dothideomycetes	Pleosporales	Pleosporaceae	Pyrenophora	1	1	2	1	1	1	1	0	0	0	0	0	4	1	4	1	1	1	1	0	0	0	0	0	1	0	1	0	1	0
Pyricularia oryzae	GCA_000002495.2	40979121	12825	318829	Fungi	Ascomycota	Sordariomycetes	Magnaporthales	Pyriculariaceae	Pyricularia	1	1	1	1	1	1	1	0	0	0	0	2	2	2	10	0	2	1	0	0	0	0	0	0	0	0	1	2	1	0
Pyronema domesticum	GCA_024516145.1	58392066	11812	47205	Fungi	Ascomycota	Pezizomycetes	Pezizales	Pyronemataceae	Pyronema	1	1	1	1	0	1	1	1	0	0	0	0	2	1	0	0	2	1	0	1	0	0	0	0	0	0	1	2	1	0
Pyronema omphalodes	GCA_000981605.1	50026054	13367	337075	Fungi	Ascomycota	Pezizomycetes	Pezizales	Pyronemataceae	Pyronema	1	1	1	1	0	1	1	1	0	0	0	0	2	1	0	0	2	1	0	1	0	0	0	0	0	0	1	2	1	0
Pyrrhoderma noxium	GCA_002287475.2	31607963	9930	2282107	Fungi	Basidiomycota	Agaricomycetes	Hymenochaetales	Hymenochaetaceae	Pyrrhoderma	2	1	1	1	1	1	0	0	0	0	0	0	1	2	0	0	2	0	1	1	1	1	0	0	0	0	1	1	0	0
Quaeritorhiza haematococci	GCA_027596845.1	48216127	13723	2654861	Fungi	Chytridiomycota	Chytridiomycetes	NA	Quaeritorhizaceae	Quaeritorhiza	1	1	1	1	1	0	1	1	0	0	1	0	0	1	0	0	1	0	2	0	0	1	0	0	0	1	1	3	0	1
Rachicladosporium antarcticum	GCA_002077065.1	47410550	18781	1507870	Fungi	Ascomycota	Dothideomycetes	Cladosporiales	Cladosporiaceae	Rachicladosporium	2	2	2	2	2	2	2	0	1	0	0	0	9	0	0	0	8	2	2	1	0	0	0	0	0	0	2	0	2	0
Racocetra fulgida	GCA_910592135.1	295993657	19906	60492	Fungi	Mucoromycota	Glomeromycetes	Diversisporales	Gigasporaceae	Racocetra	0	1	1	1	0	0	0	0	1	0	0	0	0	0	0	0	0	0	0	0	0	1	0	0	0	0	0	0	0	0
Racocetra persica	GCA_910592285.1	353070320	37045	160502	Fungi	Mucoromycota	Glomeromycetes	Diversisporales	Gigasporaceae	Racocetra	1	1	1	0	0	0	0	0	0	1	1	0	0	2	0	0	1	2	0	0	0	1	1	0	0	0	0	1	1	0
Radiomyces spectabilis	GCA_025331425.1	30409402	10886	64574	Fungi	Mucoromycota	Mucoromycetes	Mucorales	Radiomycetaceae	Radiomyces	1	1	1	2	2	0	1	1	1	0	0	0	0	4	0	0	0	0	1	1	1	1	1	0	0	1	1	2	1	1
Ramalina farinacea	GCA_029948375.1	32742913	8765	258253	Fungi	Ascomycota	Lecanoromycetes	Lecanorales	Ramalinaceae	Ramalina	1	1	1	1	1	0	1	0	0	0	0	0	1	1	0	0	1	1	0	0	0	0	0	0	0	0	0	2	0	0
Ramaria rubella	GCA_015039355.1	105462249	20275	113071	Fungi	Basidiomycota	Agaricomycetes	Gomphales	Gomphaceae	Ramaria	2	1	1	1	0	0	0	0	1	0	0	0	3	1	0	6	2	0	0	1	1	0	0	0	0	0	1	0	0	0
Ramicandelaber brevisporus	GCA_025201865.1	25531049	9222	304332	Fungi	Zoopagomycota	NA	Ramicandelaberales	Ramicandelaberaceae	Ramicandelaber	0	1	1	1	0	0	1	1	0	0	0	0	0	2	0	0	0	0	0	0	0	1	0	1	0	0	0	0	1	0
Rasamsonia emersonii	GCA_000968595.1	28248805	9843	68825	Fungi	Ascomycota	Eurotiomycetes	Eurotiales	Trichocomaceae	Rasamsonia	1	1	1	1	1	0	1	0	0	0	0	0	0	0	0	0	0	2	0	0	0	0	0	0	0	0	1	0	1	0
Rhinocladiella mackenziei	GCA_000835555.1	32474431	11382	86056	Fungi	Ascomycota	Eurotiomycetes	Chaetothyriales	Herpotrichiellaceae	Rhinocladiella	1	1	1	1	1	1	1	0	1	0	0	0	1	1	3	0	0	1	0	1	0	0	0	0	0	0	0	1	1	0
Rhizoclosmatium globosum	GCA_002104985.1	57018351	16987	329046	Fungi	Chytridiomycota	Chytridiomycetes	Chytridiales	Chytriomycetaceae	Rhizoclosmatium	1	1	1	1	0	0	1	1	0	1	0	0	1	3	1	0	1	0	2	0	1	0	1	0	0	0	0	6	1	0
Rhizoclosmatium hyalinum	GCA_027596175.1	23450088	10776	2724196	Fungi	Chytridiomycota	Chytridiomycetes	Chytridiales	Chytriomycetaceae	Rhizoclosmatium	0	1	1	1	0	0	0	0	0	1	0	0	0	2	0	0	1	0	1	0	1	0	0	0	0	0	0	1	0	0
Rhizoctonia solani	GCA_000334115.1	36938120	10489	456999	Fungi	Basidiomycota	Agaricomycetes	Cantharellales	Ceratobasidiaceae	Rhizoctonia	1	1	1	0	1	1	0	1	0	0	0	0	0	2	0	0	0	0	0	1	1	0	0	0	0	0	0	0	0	0
Rhizodiscina lignyota	GCA_010015805.1	33426352	12801	1504668	Fungi	Ascomycota	Dothideomycetes	Aulographales	Rhizodiscinaceae	Rhizodiscina	1	1	1	1	0	1	1	0	1	0	0	0	3	1	4	0	2	0	1	1	0	0	0	0	2	0	1	1	1	0
Rhizophlyctis rosea	GCA_027596075.1	48149512	12571	64517	Fungi	Chytridiomycota	Chytridiomycetes	Rhizophlyctidales	Rhizophlyctidaceae	Rhizophlyctis	1	1	4	1	0	1	1	2	0	0	0	0	1	5	0	0	0	0	2	0	1	1	0	0	0	0	0	0	0	1
Rhizopogon salebrosus	GCA_029603245.1	82271765	18871	176626	Fungi	Basidiomycota	Agaricomycetes	Boletales	Rhizopogonaceae	Rhizopogon	6	1	1	1	1	2	0	0	0	0	0	0	0	2	0	0	0	0	1	1	1	1	0	0	0	0	1	1	0	0
Rhizopogon vesiculosus	GCA_001882365.1	43780879	14191	180088	Fungi	Basidiomycota	Agaricomycetes	Boletales	Rhizopogonaceae	Rhizopogon	2	1	1	1	1	2	0	0	0	0	0	0	0	2	0	0	0	0	0	1	1	1	0	0	0	0	1	1	0	0
Rhizopogon vinicolor	GCA_001658105.1	36102320	14465	80600	Fungi	Basidiomycota	Agaricomycetes	Boletales	Rhizopogonaceae	Rhizopogon	2	1	1	1	1	2	0	0	0	0	0	0	0	2	0	0	0	0	1	1	1	1	0	0	0	0	1	1	0	0
Rhizopus delemar	GCA_000149305.1	46148878	17459	936053	Fungi	Mucoromycota	Mucoromycetes	Mucorales	Rhizopodaceae	Rhizopus	1	2	3	3	2	0	1	1	1	0	0	0	0	2	0	0	0	0	0	1	1	1	0	0	0	1	1	1	1	0
Rhizopus microsporus	GCA_000825725.1	49238270	19564	58291	Fungi	Mucoromycota	Mucoromycetes	Mucorales	Rhizopodaceae	Rhizopus	0	3	4	6	4	0	2	3	0	0	0	0	0	6	0	0	0	0	2	2	2	4	0	0	0	2	2	2	1	2
Rhodocollybia butyracea	GCA_015501585.1	96282412	22866	206335	Fungi	Basidiomycota	Agaricomycetes	Agaricales	Omphalotaceae	Rhodocollybia	2	1	1	1	0	2	0	0	0	0	0	0	1	2	0	11	0	0	1	1	1	1	0	0	0	0	1	1	1	0
Rhodofomes roseus	GCA_004679265.1	36531131	11202	34475	Fungi	Basidiomycota	Agaricomycetes	Polyporales	Fomitopsidaceae	Rhodofomes	1	1	1	1	0	2	0	0	0	0	0	0	1	1	0	2	2	0	0	1	0	1	0	0	0	0	1	1	0	0
Rhodotorula toruloides	GCA_000222205.2	20478880	2817	5286	Fungi	Basidiomycota	Microbotryomycetes	Sporidiobolales	Sporidiobolaceae	Rhodotorula	0	0	1	0	0	0	0	0	0	0	0	0	2	0	0	0	1	0	0	0	0	0	0	0	0	0	0	1	0	0
Rhynchosporium agropyri	GCA_900074905.1	52477121	13673	914238	Fungi	Ascomycota	Leotiomycetes	Helotiales	Ploettnerulaceae	Rhynchosporium	1	1	1	1	0	1	1	0	1	0	0	1	10	4	2	0	3	4	1	1	0	0	0	0	1	0	1	1	1	0
Rhynchosporium commune	GCA_900074885.1	55639110	12211	914237	Fungi	Ascomycota	Leotiomycetes	Helotiales	Ploettnerulaceae	Rhynchosporium	1	1	1	1	0	1	1	0	1	0	0	0	8	4	2	0	2	4	1	1	0	0	0	0	1	0	1	1	1	0
Rhynchosporium secalis	GCA_900074895.1	49411302	13145	38038	Fungi	Ascomycota	Leotiomycetes	Helotiales	Ploettnerulaceae	Rhynchosporium	1	1	1	1	0	1	1	0	1	0	0	1	6	4	2	0	2	4	1	2	0	0	0	0	1	0	1	1	1	0
Rickenella mellea	GCA_004355085.1	45069463	17134	50990	Fungi	Basidiomycota	Agaricomycetes	Hymenochaetales	NA	Rickenella	2	1	1	2	1	2	0	0	0	0	0	0	2	2	0	15	7	0	1	1	1	1	0	0	0	0	1	1	1	0
Roridomyces roridus	GCA_029378245.1	91122911	26379	1738132	Fungi	Basidiomycota	Agaricomycetes	Agaricales	NA	Roridomyces	3	1	1	2	1	2	0	0	1	0	0	0	2	2	0	17	0	0	1	1	1	1	0	0	0	0	1	1	0	1
Rosellinia necatrix	GCA_001445595.3	44257831	12444	77044	Fungi	Ascomycota	Sordariomycetes	Xylariales	Xylariaceae	Rosellinia	1	1	1	1	1	1	1	0	0	0	0	0	2	2	3	0	1	1	0	0	0	0	0	0	0	0	1	0	1	0
Rozella allomycis	GCA_000442015.1	11859274	6350	281847	Fungi	Cryptomycota	NA	NA	NA	Rozella	1	2	1	1	1	1	0	1	0	0	0	0	0	1	0	0	0	0	0	1	0	0	0	0	0	0	1	1	1	0
Russula emetica	GCA_015178925.1	55121418	13214	152958	Fungi	Basidiomycota	Agaricomycetes	Russulales	Russulaceae	Russula	1	1	1	1	1	2	0	1	0	0	0	0	1	1	0	1	0	0	0	1	1	1	0	0	0	0	1	0	0	0
Russula ochroleuca	GCA_015178965.1	44738512	12046	152965	Fungi	Basidiomycota	Agaricomycetes	Russulales	Russulaceae	Russula	1	1	1	1	1	1	0	0	1	0	0	0	1	1	0	1	0	0	0	1	1	1	0	0	0	0	1	1	0	0
Russula vinacea	GCA_022376525.1	43280073	12674	517384	Fungi	Basidiomycota	Agaricomycetes	Russulales	Russulaceae	Russula	1	1	1	6	1	1	0	0	0	0	0	0	1	1	0	0	0	0	0	0	0	1	0	0	0	0	1	0	0	0
Saccharata proteae	GCA_010015785.1	31432921	9234	131308	Fungi	Ascomycota	Dothideomycetes	Botryosphaeriales	Saccharataceae	Saccharata	1	1	1	1	1	1	1	1	1	0	0	0	3	1	0	0	1	0	1	1	0	0	0	0	0	0	1	1	1	0
Saccharomyces cerevisiae	GCA_000091065.2	586761	298	4932	Fungi	Ascomycota	Saccharomycetes	Saccharomycetales	Saccharomycetaceae	Saccharomyces	0	1	1	0	2	0	0	0	0	0	0	0	0	0	0	0	0	0	1	0	1	0	0	0	0	0	1	1	0	1
Saccharomycodes ludwigii	GCA_020623625.1	12500424	5031	36035	Fungi	Ascomycota	Saccharomycetes	Saccharomycetales	Saccharomycodaceae	Saccharomycodes	0	1	1	0	1	0	0	0	0	0	0	0	0	0	0	0	0	0	1	0	1	0	0	0	0	0	1	2	1	0
Saitoella complicata	GCA_000227095.3	14130614	7119	5606	Fungi	Ascomycota	NA	NA	NA	Saitoella	1	1	1	1	0	0	1	0	1	0	0	0	0	3	0	0	0	0	1	1	1	0	0	0	0	0	1	1	1	0
Saitozyma podzolica	GCA_003942215.1	29888215	10224	1890683	Fungi	Basidiomycota	Tremellomycetes	Tremellales	Trimorphomycetaceae	Saitozyma	1	1	1	1	1	1	1	0	0	1	0	0	2	1	0	0	1	0	0	1	1	0	0	0	0	0	1	0	0	1
Salinomyces thailandica	GCA_005059885.1	23885016	8778	706561	Fungi	Ascomycota	Dothideomycetes	Mycosphaerellales	Teratosphaeriaceae	Salinomyces	1	1	1	1	1	1	1	0	1	0	0	0	7	1	0	0	0	1	0	1	0	0	0	0	0	0	1	0	1	0
Sanghuangporus baumii	GCA_001481415.2	31641441	8455	108892	Fungi	Basidiomycota	Agaricomycetes	Hymenochaetales	Hymenochaetaceae	Sanghuangporus	2	1	1	1	1	1	0	0	0	0	0	0	0	2	0	3	0	0	1	1	1	1	0	0	0	0	1	0	0	0
Saprochaete ingens	GCA_902498895.1	21189208	6475	2606893	Fungi	Ascomycota	Saccharomycetes	Saccharomycetales	Dipodascaceae	Saprochaete	0	1	1	1	1	0	1	1	0	0	0	0	0	0	0	0	0	0	1	0	1	0	0	0	0	0	1	2	1	1
Sarcosagium campestre	GCA_026026355.1	20202879	6492	286406	Fungi	Ascomycota	NA	NA	NA	Sarcosagium	1	1	2	1	1	1	1	0	0	0	0	0	1	1	0	0	0	2	0	0	0	0	0	0	0	0	0	0	0	0
Sarea resinae	GCA_026026165.1	25517000	7422	273283	Fungi	Ascomycota	Sareomycetes	Sareales	Zythiaceae	Sarea	1	1	1	1	1	0	1	0	0	0	0	0	0	1	0	0	0	1	0	0	0	0	0	0	0	0	1	0	1	0
Sarocladium implicatum	GCA_021176775.1	30180565	12032	1610689	Fungi	Ascomycota	Sordariomycetes	Hypocreales	Sarocladiaceae	Sarocladium	1	1	1	1	1	1	1	0	0	0	0	0	2	1	0	0	0	1	1	0	0	0	0	0	0	0	1	1	1	0
Sarocladium strictum	GCA_030435815.1	32378563	9971	5046	Fungi	Ascomycota	Sordariomycetes	Hypocreales	Sarocladiaceae	Sarocladium	1	1	1	1	1	1	1	0	0	0	0	0	1	1	0	0	0	1	1	0	0	0	0	0	0	0	1	1	1	0
Scedosporium apiospermum	GCA_000732125.1	43437139	8376	563466	Fungi	Ascomycota	Sordariomycetes	Microascales	Microascaceae	Scedosporium	0	1	1	1	0	1	1	0	0	0	0	0	2	1	7	0	1	0	0	0	0	0	0	0	0	0	1	0	1	0
Schaereria dolodes	GCA_022814065.1	29790850	6891	1042397	Fungi	Ascomycota	Lecanoromycetes	Sarrameanales	NA	Schaereria	1	1	1	1	1	1	1	0	0	0	0	0	2	1	0	0	0	1	0	0	0	0	0	0	0	0	0	0	1	0
Scheffersomyces spartinae	GCA_019049425.1	12132557	5045	45513	Fungi	Ascomycota	Saccharomycetes	Saccharomycetales	Debaryomycetaceae	Scheffersomyces	0	1	1	0	0	0	0	0	0	0	0	0	0	1	0	0	0	0	1	0	1	0	0	0	0	0	1	0	1	0
Scheffersomyces stipitis	GCA_000209165.1	15441179	5818	4924	Fungi	Ascomycota	Saccharomycetes	Saccharomycetales	Debaryomycetaceae	Scheffersomyces	0	1	1	0	0	0	0	0	0	0	0	0	0	0	0	0	0	0	1	0	1	0	0	0	0	0	1	1	1	0
Schizopora paradoxa	GCA_001020605.1	44406206	17088	27342	Fungi	Basidiomycota	Agaricomycetes	Hymenochaetales	Schizoporaceae	Schizopora	2	1	1	1	1	2	0	0	0	0	0	0	1	2	0	0	8	0	1	1	0	1	0	0	0	0	1	1	1	0
Schizosaccharomyces cryophilus	GCA_000004155.2	11554764	5155	866546	Fungi	Ascomycota	Schizosaccharomycetes	Schizosaccharomycetales	Schizosaccharomycetaceae	Schizosaccharomyces	1	1	1	1	1	0	0	0	0	0	0	0	1	1	0	0	0	0	0	1	0	0	0	0	0	0	1	2	1	1
Schizosaccharomyces japonicus	GCA_000149845.2	11733154	4878	4897	Fungi	Ascomycota	Schizosaccharomycetes	Schizosaccharomycetales	Schizosaccharomycetaceae	Schizosaccharomyces	1	1	1	1	1	0	0	0	0	0	0	0	1	1	0	0	0	0	0	1	0	0	0	0	0	0	1	2	1	1
Schizosaccharomyces pombe	GCA_000002945.2	12571820	5132	4896	Fungi	Ascomycota	Schizosaccharomycetes	Schizosaccharomycetales	Schizosaccharomycetaceae	Schizosaccharomyces	1	1	1	1	1	0	0	0	0	0	0	0	1	1	0	0	0	0	0	1	0	0	0	0	0	0	1	2	1	1
Scleroderma citrinum	GCA_000827425.1	56144862	20993	68788	Fungi	Basidiomycota	Agaricomycetes	Boletales	Sclerodermataceae	Scleroderma	2	2	1	1	0	2	0	0	0	0	0	0	0	2	0	0	0	0	1	1	0	1	0	0	0	0	1	0	0	0
Sclerotinia borealis	GCA_000503235.1	39450085	10166	77105	Fungi	Ascomycota	Leotiomycetes	Helotiales	Sclerotiniaceae	Sclerotinia	1	1	1	1	1	1	1	0	0	0	0	1	4	1	0	0	1	3	0	1	0	0	0	0	0	0	1	0	1	0
Sclerotinia sclerotiorum	GCA_000146945.2	38459164	14491	5180	Fungi	Ascomycota	Leotiomycetes	Helotiales	Sclerotiniaceae	Sclerotinia	1	1	1	1	1	1	1	0	0	0	0	1	4	1	0	0	1	4	0	0	0	0	0	0	0	0	1	1	1	0
Scutellospora calospora	GCA_910592325.1	147042245	11479	85575	Fungi	Mucoromycota	Glomeromycetes	Diversisporales	Gigasporaceae	Scutellospora	2	1	1	1	0	0	0	0	0	0	0	0	0	0	0	0	0	1	0	0	0	0	0	0	0	0	0	2	0	0
Scytalidium lignicola	GCA_002812745.2	47714899	12795	5539	Fungi	Ascomycota	Leotiomycetes	NA	NA	Scytalidium	0	1	1	1	1	1	1	0	0	0	0	0	6	1	2	0	0	3	0	1	0	0	0	0	0	0	1	1	1	0
Seirophora lacunosa	GCA_023645825.1	38782695	8114	1145348	Fungi	Ascomycota	Lecanoromycetes	Teloschistales	Teloschistaceae	Seirophora	1	1	1	1	1	0	1	0	0	0	0	0	0	1	0	0	0	0	0	0	0	0	0	0	0	0	0	1	0	0
Seirophora villosa	GCA_023645815.1	36718449	7460	671929	Fungi	Ascomycota	Lecanoromycetes	Teloschistales	Teloschistaceae	Seirophora	1	1	1	1	1	0	1	0	0	0	0	0	1	1	0	0	0	0	0	0	0	0	0	0	0	0	0	1	0	0
Septoria linicola	GCA_024114885.1	39589424	13096	215465	Fungi	Ascomycota	Dothideomycetes	Mycosphaerellales	Mycosphaerellaceae	Septoria	1	1	1	1	1	1	1	0	0	0	0	0	7	1	0	0	5	2	1	0	0	0	0	0	0	0	1	1	1	0
Serendipita indica	GCA_000313545.1	25043662	11791	65672	Fungi	Basidiomycota	Agaricomycetes	Sebacinales	Serendipitaceae	Serendipita	2	1	1	1	1	1	0	1	1	0	0	0	5	2	0	1	2	0	1	1	0	1	0	0	0	0	1	0	1	0
Serendipita vermifera	GCA_000827415.1	38094242	15235	109899	Fungi	Basidiomycota	Agaricomycetes	Sebacinales	Serendipitaceae	Serendipita	3	1	1	2	1	1	0	1	0	0	0	0	5	3	0	1	2	0	1	2	1	1	0	0	0	0	1	1	1	0
Serpula lacrymans	GCA_000218685.1	42797233	12920	85982	Fungi	Basidiomycota	Agaricomycetes	Boletales	Serpulaceae	Serpula	2	1	1	1	1	1	0	0	0	0	0	0	1	2	0	0	0	0	1	0	1	1	0	0	0	0	1	0	0	0
Setomelanomma holmii	GCA_010015745.1	39179649	14389	210430	Fungi	Ascomycota	Dothideomycetes	Pleosporales	Phaeosphaeriaceae	Setomelanomma	1	1	2	2	1	1	1	0	0	0	0	0	3	3	2	0	2	2	1	1	0	0	0	0	1	0	2	0	1	0
Sistotremastrum niveocremeum	GCA_001630475.1	35361098	13069	139134	Fungi	Basidiomycota	Agaricomycetes	Trechisporales	NA	Sistotremastrum	2	1	2	1	0	0	0	0	0	0	0	0	2	1	1	3	2	0	0	1	1	1	0	0	0	0	1	1	1	0
Sistotremastrum suecicum	GCA_001632355.1	33857913	13651	467971	Fungi	Basidiomycota	Agaricomycetes	Trechisporales	NA	Sistotremastrum	2	1	2	1	0	1	0	0	0	0	0	0	2	1	1	3	2	0	0	1	1	1	0	0	0	0	1	1	1	0
Smittium culicis	GCA_001970855.1	77124806	12166	133412	Fungi	Zoopagomycota	Harpellomycetes	Harpellales	Legeriomycetaceae	Smittium	5	1	0	0	1	0	0	0	0	0	0	0	0	4	0	0	0	0	0	0	0	0	0	2	0	0	0	0	0	1
Smittium mucronatum	GCA_001953115.1	102350667	8247	133383	Fungi	Zoopagomycota	Harpellomycetes	Harpellales	Legeriomycetaceae	Smittium	2	1	0	0	1	0	0	0	0	0	0	0	0	3	0	0	0	0	0	0	0	0	0	0	0	0	0	0	0	0
Sodiomyces alkalinus	GCA_003711515.1	43450096	9403	1302862	Fungi	Ascomycota	Sordariomycetes	Glomerellales	Plectosphaerellaceae	Sodiomyces	1	1	1	1	1	1	1	0	0	1	0	0	1	1	1	0	2	1	0	0	0	0	0	0	0	0	1	2	1	0
Sordaria macrospora	GCA_000182805.2	38391383	9899	5147	Fungi	Ascomycota	Sordariomycetes	Sordariales	Sordariaceae	Sordaria	1	1	1	1	1	1	1	0	0	0	0	1	2	1	2	0	1	1	0	0	0	0	0	0	0	0	1	2	1	0
Sparassis crispa	GCA_003851025.1	39020349	13157	139825	Fungi	Basidiomycota	Agaricomycetes	Polyporales	Sparassidaceae	Sparassis	2	1	1	1	1	1	0	0	0	0	0	0	1	2	0	0	1	0	1	0	1	1	0	0	0	0	1	1	1	0
Spathaspora passalidarum	GCA_000223485.1	13182099	5983	340170	Fungi	Ascomycota	Saccharomycetes	Saccharomycetales	Debaryomycetaceae	Spathaspora	0	1	1	0	0	0	0	0	0	0	0	0	0	1	0	0	0	0	1	0	1	0	0	0	0	0	1	0	1	0
Sphaceloma murrayae	GCA_002895985.1	20718688	8256	2082308	Fungi	Ascomycota	Dothideomycetes	Myriangiales	Elsinoaceae	Sphaceloma	1	1	1	1	1	1	1	0	0	0	0	0	2	1	0	0	1	1	0	1	0	0	0	0	0	0	1	1	1	0
Sphaerobolus stellatus	GCA_000827215.1	176372157	35177	68786	Fungi	Basidiomycota	Agaricomycetes	Geastrales	Sphaerobolaceae	Sphaerobolus	2	1	1	3	1	0	0	3	0	0	0	0	2	4	1	8	2	0	0	0	0	1	0	0	0	0	1	0	0	1
Sphaerosporella brunnea	GCA_008704415.1	51598955	12594	1250544	Fungi	Ascomycota	Pezizomycetes	Pezizales	Pyronemataceae	Sphaerosporella	1	1	2	1	0	1	1	0	1	0	0	0	1	1	0	0	0	0	0	1	0	0	0	0	0	0	1	2	1	0
Sphaerulina musiva	GCA_000320565.2	29352103	10156	85929	Fungi	Ascomycota	Dothideomycetes	Mycosphaerellales	Mycosphaerellaceae	Sphaerulina	1	1	1	1	1	1	1	0	0	0	0	0	5	1	0	0	2	2	1	1	0	0	0	0	0	0	1	1	1	0
Sphagnurus paluster	GCA_018282025.1	43981317	12368	117069	Fungi	Basidiomycota	Agaricomycetes	Agaricales	Lyophyllaceae	Sphagnurus	1	1	1	0	1	0	0	0	0	0	0	0	1	1	0	13	0	0	1	0	1	1	0	0	0	0	1	0	0	1
Spinellus fusiger	GCA_025094145.1	38198483	10135	101115	Fungi	Mucoromycota	Mucoromycetes	Mucorales	Phycomycetaceae	Spinellus	1	2	2	2	1	0	1	1	1	0	0	0	0	1	0	0	0	0	0	1	1	1	0	1	0	0	1	1	1	1
Spiromyces aspiralis	GCA_027478575.1	20085164	8881	68401	Fungi	Zoopagomycota	Kickxellomycetes	Kickxellales	Kickxellaceae	Spiromyces	2	1	0	1	1	0	0	0	0	0	0	0	0	3	0	0	0	0	1	1	0	1	0	0	0	0	1	1	0	0
Spizellomyces punctatus	GCA_000182565.2	24131112	8950	109760	Fungi	Chytridiomycota	Chytridiomycetes	Spizellomycetales	Spizellomycetaceae	Spizellomyces	1	1	1	1	0	1	1	2	0	1	0	0	0	3	0	0	0	0	2	0	0	1	0	0	0	0	0	2	1	1
Sporisorium graminicola	GCA_005498985.1	19565848	6591	280036	Fungi	Basidiomycota	Ustilaginomycetes	Ustilaginales	Ustilaginaceae	Sporisorium	1	0	1	1	1	0	1	1	1	0	0	0	0	1	0	0	1	0	0	1	1	0	0	0	0	0	1	0	0	0
Sporisorium reilianum	GCA_000230245.1	18476874	6673	72558	Fungi	Basidiomycota	Ustilaginomycetes	Ustilaginales	Ustilaginaceae	Sporisorium	1	1	1	1	1	0	1	1	1	0	0	0	0	1	0	0	1	0	0	1	1	0	0	0	0	0	1	0	0	0
Sporisorium scitamineum	GCA_001243155.1	19893839	7711	49012	Fungi	Basidiomycota	Ustilaginomycetes	Ustilaginales	Ustilaginaceae	Sporisorium	1	1	1	1	1	0	1	0	1	0	0	0	0	1	0	0	1	0	0	1	1	0	0	0	0	0	1	0	0	0
Sporobolomyces salmonicolor	GCA_001373355.1	20525926	4672	5005	Fungi	Basidiomycota	Microbotryomycetes	Sporidiobolales	Sporidiobolaceae	Sporidiobolus	1	1	1	1	0	0	1	1	0	0	0	0	1	1	0	0	1	0	0	0	0	0	0	0	0	0	1	1	0	1
Sporodiniella umbellata	GCA_025677835.1	26235891	10779	101117	Fungi	Mucoromycota	Mucoromycetes	Mucorales	Rhizopodaceae	Sporodiniella	0	3	2	1	2	0	1	1	1	0	0	0	0	2	0	0	0	0	0	0	1	1	0	0	0	1	1	2	1	1
Sporormia fimetaria	GCA_010093795.1	25892244	10774	718229	Fungi	Ascomycota	Dothideomycetes	Pleosporales	Sporormiaceae	Sporormia	0	1	1	1	1	0	1	0	0	0	0	0	3	1	3	0	2	1	1	1	0	0	0	0	0	0	1	1	1	0
Sporothrix brasiliensis	GCA_000820605.1	33205847	9091	545650	Fungi	Ascomycota	Sordariomycetes	Ophiostomatales	Ophiostomataceae	Sporothrix	1	1	1	1	1	1	1	0	0	0	0	0	3	2	4	0	1	1	0	0	0	0	0	0	0	0	1	0	1	0
Sporothrix schenckii	GCA_000474925.1	32228000	8674	29908	Fungi	Ascomycota	Sordariomycetes	Ophiostomatales	Ophiostomataceae	Sporothrix	1	1	1	1	1	1	1	0	0	0	0	0	4	2	7	0	1	1	0	0	0	0	0	0	0	0	1	2	1	0
Spraguea lophii	GCA_000430065.1	4980876	2499	51541	Fungi	Microsporidia	NA	NA	Spraguidae	Spraguea	0	2	0	0	0	1	0	0	0	0	0	0	0	0	0	0	0	0	0	0	0	0	0	0	0	0	0	0	0	0
Stachybotrys chartarum	GCA_000730325.1	36879702	11530	74722	Fungi	Ascomycota	Sordariomycetes	Hypocreales	Stachybotryaceae	Stachybotrys	1	1	1	1	1	1	1	0	0	0	0	0	2	1	0	0	0	1	1	0	0	0	0	0	0	0	1	1	2	0
Stagonosporopsis vannaccii	GCA_028584115.1	30958390	12024	2606854	Fungi	Ascomycota	Dothideomycetes	Pleosporales	Didymellaceae	Stagonosporopsis	1	1	1	1	1	0	1	0	1	0	0	0	3	1	2	0	1	1	1	1	0	0	0	0	0	0	2	0	1	0
Staphylotrichum longicolle	GCA_019096155.1	35599146	10761	669026	Fungi	Ascomycota	Sordariomycetes	Sordariales	Chaetomiaceae	Staphylotrichum	1	1	1	1	1	1	1	0	0	0	0	1	3	2	5	0	3	1	0	0	0	0	0	0	0	0	1	1	2	0
Steccherinum ochraceum	GCA_004332605.1	35274896	12260	92696	Fungi	Basidiomycota	Agaricomycetes	Polyporales	Steccherinaceae	Steccherinum	1	1	1	1	0	2	0	1	0	0	0	0	1	2	0	7	5	0	1	1	1	1	0	0	0	0	1	0	0	0
Stemphylium lycopersici	GCA_001191545.1	35173254	8997	183478	Fungi	Ascomycota	Dothideomycetes	Pleosporales	Pleosporaceae	Stemphylium	1	1	1	1	1	1	1	0	0	0	0	1	2	1	4	0	2	1	1	0	0	0	0	0	0	0	2	1	1	0
Stereum hirsutum	GCA_000264905.1	46511623	14066	40492	Fungi	Basidiomycota	Agaricomycetes	Russulales	Stereaceae	Stereum	2	1	1	1	1	3	0	1	1	0	0	0	3	2	0	5	1	0	0	1	1	1	0	0	0	0	1	0	0	0
Sticta canariensis	GCA_022814045.1	43439209	8529	243211	Fungi	Ascomycota	Lecanoromycetes	Peltigerales	Lobariaceae	Sticta	1	2	1	1	1	0	1	0	0	0	0	0	1	0	0	0	1	0	0	0	0	0	0	0	0	0	1	0	1	0
Stictis urceolata	GCA_022814025.1	34144946	10151	2704026	Fungi	Ascomycota	Lecanoromycetes	Ostropales	Stictidaceae	Stictis	1	1	1	2	0	1	0	0	0	0	0	0	1	1	1	0	1	0	0	0	0	0	0	0	0	0	1	2	1	0
Stipitochalara longipes	GCA_009732865.1	52432785	19753	112123	Fungi	Ascomycota	Leotiomycetes	Helotiales	NA	Chalara	1	1	1	1	1	1	1	0	1	0	0	0	11	5	3	0	3	4	0	1	0	0	0	0	1	0	1	1	1	0
Stromatinia cepivora	GCA_014898415.1	55666819	11003	38492	Fungi	Ascomycota	Leotiomycetes	Helotiales	Sclerotiniaceae	Stromatinia	1	1	1	1	1	1	1	0	0	0	0	1	5	1	0	0	1	4	0	1	0	0	0	0	0	0	1	0	1	0
Stylonectria norvegica	GCA_014621405.1	35092433	10132	1736662	Fungi	Ascomycota	Sordariomycetes	Hypocreales	Nectriaceae	Stylonectria	1	1	1	1	1	1	1	0	0	0	0	0	3	1	0	0	0	1	0	0	0	0	0	0	0	0	1	1	1	0
Sugiyamaella lignohabitans	GCA_001640025.2	15982127	5135	796027	Fungi	Ascomycota	Saccharomycetes	Saccharomycetales	Trichomonascaceae	Sugiyamaella	0	0	1	1	1	0	0	1	1	0	0	0	0	0	0	0	0	0	1	0	1	0	0	0	0	0	1	1	1	1
Suhomyces tanzawaensis	GCA_001661415.1	13136204	5884	46583	Fungi	Ascomycota	Saccharomycetes	Saccharomycetales	Debaryomycetaceae	Suhomyces	0	1	1	0	1	0	0	0	0	0	0	0	0	0	0	0	0	0	1	0	1	0	0	0	0	0	1	1	1	0
Suillus ampliporus	GCA_016584345.1	58334580	16523	1912932	Fungi	Basidiomycota	Agaricomycetes	Boletales	Suillaceae	Suillus	2	1	1	1	0	2	0	0	0	0	0	0	0	2	0	0	0	0	1	1	1	1	0	0	0	0	1	0	0	0
Suillus brevipes	GCA_011800875.2	52027859	21442	48565	Fungi	Basidiomycota	Agaricomycetes	Boletales	Suillaceae	Suillus	2	2	1	1	0	2	0	0	0	0	0	0	0	2	0	0	0	0	1	1	1	1	0	0	0	0	1	1	0	0
Suillus luteus	GCA_000827255.1	37014302	18303	5384	Fungi	Basidiomycota	Agaricomycetes	Boletales	Suillaceae	Suillus	2	2	1	1	0	2	0	0	0	0	0	0	0	2	0	0	0	0	1	1	1	1	0	0	0	0	1	0	0	0
Syncephalastrum racemosum	GCA_002105135.1	30745403	11121	13706	Fungi	Mucoromycota	Mucoromycetes	Mucorales	Syncephalastraceae	Syncephalastrum	1	1	2	2	1	0	1	0	0	0	0	0	0	4	0	0	0	0	1	1	1	0	0	0	0	1	1	2	1	0
Syncephalis fuscata	GCA_025786725.1	29358178	8844	1851187	Fungi	Zoopagomycota	Zoopagomycetes	Zoopagales	Piptocephalidaceae	Syncephalis	1	2	1	0	0	0	1	1	0	0	0	0	0	2	0	0	0	0	0	1	0	1	0	0	0	0	0	0	1	1
Syncephalis plumigaleata	GCA_025201365.1	32907727	8032	1851185	Fungi	Zoopagomycota	Zoopagomycetes	Zoopagales	Piptocephalidaceae	Syncephalis	1	0	1	0	1	0	1	0	0	0	0	0	0	2	0	0	0	0	0	1	0	1	0	0	0	0	0	0	1	1
Syncephalis pseudoplumigaleata	GCA_003614755.1	16263107	6118	1712513	Fungi	Zoopagomycota	Zoopagomycetes	Zoopagales	Piptocephalidaceae	Syncephalis	1	2	0	0	1	0	1	1	0	0	0	0	0	1	0	0	0	0	0	1	0	1	0	0	0	0	0	0	0	1
Synchytrium endobioticum	GCA_006535955.1	21483073	8031	286115	Fungi	Chytridiomycota	Chytridiomycetes	Synchytriales	Synchytriaceae	Synchytrium	0	1	1	1	0	0	1	4	0	1	0	0	0	3	0	0	0	0	0	0	0	1	1	0	0	0	0	1	1	1
Synchytrium microbalum	GCA_006535985.1	26244175	6308	1806994	Fungi	Chytridiomycota	Chytridiomycetes	Synchytriales	Synchytriaceae	Synchytrium	0	1	1	1	0	0	1	1	0	1	0	0	0	2	0	0	0	0	2	0	0	1	0	0	0	0	0	1	2	1
Talaromyces marneffei	GCA_000001985.1	28643865	10023	37727	Fungi	Ascomycota	Eurotiomycetes	Eurotiales	Trichocomaceae	Talaromyces	1	1	1	1	1	0	1	0	0	0	0	0	2	1	0	0	0	1	0	0	0	0	0	0	0	0	1	0	1	0
Talaromyces pinophilus	GCA_000829775.1	36402801	10912	128442	Fungi	Ascomycota	Eurotiomycetes	Eurotiales	Trichocomaceae	Talaromyces	1	0	1	1	1	0	1	0	0	0	0	0	4	1	0	0	0	1	0	0	0	0	0	0	0	0	1	0	1	0
Talaromyces stipitatus	GCA_000003125.1	35685443	12457	28564	Fungi	Ascomycota	Eurotiomycetes	Eurotiales	Trichocomaceae	Talaromyces	1	1	1	1	1	0	1	0	0	0	0	0	3	1	0	0	0	1	0	0	0	0	0	0	0	0	1	0	2	0
Taphrina deformans	GCA_000312925.2	13394157	4663	5011	Fungi	Ascomycota	Taphrinomycetes	Taphrinales	Taphrinaceae	Taphrina	1	1	0	1	0	0	0	0	1	0	0	0	0	1	0	0	1	0	0	0	0	0	0	0	0	0	1	2	0	1
Teloschistes flavicans	GCA_023646325.1	25623555	8392	442469	Fungi	Ascomycota	Lecanoromycetes	Teloschistales	Teloschistaceae	Teloschistes	1	1	1	1	1	0	1	0	0	0	0	0	1	1	0	0	1	0	0	0	0	0	0	0	0	0	0	0	0	0
Teloschistes peruensis	GCA_023645835.1	26732002	8434	2903223	Fungi	Ascomycota	Lecanoromycetes	Teloschistales	Teloschistaceae	Teloschistes	1	1	1	1	1	0	1	0	0	0	0	0	0	0	0	0	1	0	0	0	0	0	0	0	0	0	0	1	0	0
Tephrocybe rancida	GCA_018858115.1	66681331	16872	117070	Fungi	Basidiomycota	Agaricomycetes	Agaricales	Lyophyllaceae	Tephrocybe	1	0	1	1	1	1	0	0	0	0	0	0	0	1	0	6	0	0	1	0	1	1	0	0	0	0	1	0	0	0
Teratosphaeria destructans	GCA_004009835.2	32087942	10356	418781	Fungi	Ascomycota	Dothideomycetes	Mycosphaerellales	Teratosphaeriaceae	Teratosphaeria	1	1	1	1	1	1	1	0	0	0	0	0	3	0	0	0	1	2	1	1	0	0	0	0	0	0	1	0	1	0
Teratosphaeria nubilosa	GCA_010093825.1	28443146	10998	161662	Fungi	Ascomycota	Dothideomycetes	Mycosphaerellales	Teratosphaeriaceae	Teratosphaeria	1	1	1	1	1	1	1	0	0	0	0	0	3	0	0	0	1	1	1	1	0	0	0	0	0	0	1	0	1	0
Terfezia boudieri	GCA_003788615.2	63234573	12110	82571	Fungi	Ascomycota	Pezizomycetes	Pezizales	Pezizaceae	Terfezia	1	1	1	1	0	1	1	0	0	0	0	0	2	1	0	0	0	2	0	0	0	0	0	0	1	0	1	1	1	0
Terfezia claveryi	GCA_015179025.1	74471381	12765	139407	Fungi	Ascomycota	Pezizomycetes	Pezizales	Pezizaceae	Terfezia	1	1	1	1	1	1	1	0	0	0	0	0	1	1	0	0	0	1	0	0	0	0	0	0	1	0	1	1	1	0
Testicularia cyperi	GCA_003144125.1	20778962	7069	1882483	Fungi	Basidiomycota	Ustilaginomycetes	Ustilaginales	Anthracoideaceae	Testicularia	1	1	1	1	0	0	0	1	1	0	0	0	0	0	0	0	1	0	0	1	1	0	0	0	0	0	1	0	0	0
Tetrapisispora blattae	GCA_000315915.1	14048593	5389	1071379	Fungi	Ascomycota	Saccharomycetes	Saccharomycetales	Saccharomycetaceae	Tetrapisispora	0	1	1	0	2	0	0	0	0	0	0	0	0	0	0	0	0	0	0	0	1	0	0	0	0	0	1	2	0	1
Tetrapisispora phaffii	GCA_000236905.1	12115070	5253	113608	Fungi	Ascomycota	Saccharomycetes	Saccharomycetales	Saccharomycetaceae	Tetrapisispora	0	1	1	0	2	0	0	0	0	0	0	0	0	0	0	0	0	0	0	0	1	0	0	0	0	0	1	1	0	1
Tetrapyrgos nigripes	GCA_013368315.1	99142376	18803	182062	Fungi	Basidiomycota	Agaricomycetes	Agaricales	Marasmiaceae	Tetrapyrgos	3	0	1	1	1	1	0	0	0	0	0	0	1	1	1	3	1	0	0	1	1	1	0	0	0	0	1	1	1	0
Thamnidium elegans	GCA_016758935.1	30942812	9713	101142	Fungi	Mucoromycota	Mucoromycetes	Mucorales	Mucoraceae	Thamnidium	1	2	2	1	2	0	1	1	1	0	0	0	0	2	0	0	0	0	1	1	1	2	0	0	0	1	1	2	1	1
Thamnocephalis sphaerospora	GCA_003614735.1	18203817	6857	78915	Fungi	Zoopagomycota	Zoopagomycetes	Zoopagales	Sigmoideomycetaceae	Thamnocephalis	1	1	1	0	1	0	0	0	0	0	0	0	0	2	0	0	0	0	0	1	0	1	0	0	0	0	0	0	1	0
Thelephora ganbajun	GCA_014904855.1	36335475	12640	370292	Fungi	Basidiomycota	Agaricomycetes	Thelephorales	Thelephoraceae	Thelephora	2	1	1	1	1	1	0	1	1	0	0	0	1	2	0	0	0	0	0	0	1	1	0	0	0	0	1	0	0	0
Thelephora terrestris	GCA_015956445.1	40733037	13337	56493	Fungi	Basidiomycota	Agaricomycetes	Thelephorales	Thelephoraceae	Thelephora	3	2	1	1	1	2	0	1	0	0	0	0	1	2	0	0	0	0	0	0	1	1	0	0	0	0	1	1	0	0
Thelocarpon impressellum	GCA_026025805.1	21440141	6437	1116844	Fungi	Ascomycota	NA	Thelocarpales	Thelocarpaceae	Thelocarpon	1	1	1	1	1	1	1	0	0	0	0	0	0	0	0	0	0	1	0	1	0	0	0	0	0	0	1	1	0	0
Thelohania contejeani	GCA_014805555.1	10381894	2865	164912	Fungi	Microsporidia	NA	NA	Astathelohaniidae	Astathelohania	0	2	0	0	0	1	0	0	0	0	0	0	0	0	0	0	0	0	0	0	0	0	0	0	0	0	0	0	0	0
Thelonectria olida	GCA_020736575.1	52862545	16644	1576542	Fungi	Ascomycota	Sordariomycetes	Hypocreales	Nectriaceae	Thelonectria	1	1	1	1	1	1	1	0	0	0	0	0	4	1	1	0	1	1	1	0	0	0	0	0	0	0	1	0	1	0
Thelotrema lepadinum	GCA_022813995.1	37058936	11395	209281	Fungi	Ascomycota	Lecanoromycetes	Ostropales	Graphidaceae	Thelotrema	1	1	1	1	1	1	1	0	0	0	0	0	4	1	2	0	0	1	0	1	0	0	0	0	0	0	1	1	0	0
Thermochaetoides thermophila	GCA_000221225.1	28322806	7165	209285	Fungi	Ascomycota	Sordariomycetes	Sordariales	Chaetomiaceae	Chaetomium	0	1	1	1	1	1	1	0	0	0	0	0	1	1	6	0	1	1	0	0	0	0	0	0	0	0	1	1	1	0
Thermothelomyces thermophilus	GCA_000226095.1	38744216	9097	78579	Fungi	Ascomycota	Sordariomycetes	Sordariales	Chaetomiaceae	Thermothelomyces	1	1	1	1	1	1	1	0	0	0	0	0	0	2	6	0	2	1	0	0	0	0	0	0	0	0	1	1	1	0
Thermothielavioides terrestris	GCA_000226115.1	36912256	9802	2587410	Fungi	Ascomycota	Sordariomycetes	Sordariales	Chaetomiaceae	Thermothielavioides	1	1	1	1	1	1	1	0	0	0	0	1	1	1	4	0	2	1	0	0	0	0	0	0	0	0	1	1	1	0
Thielaviopsis punctulata	GCA_000968615.1	28117660	5296	72032	Fungi	Ascomycota	Sordariomycetes	Microascales	Ceratocystidaceae	Thielaviopsis	1	1	1	1	1	0	1	0	0	0	0	0	0	0	0	0	0	1	0	0	0	0	0	0	0	0	1	0	1	0
Thoreauomyces humboldtii	GCA_027596035.1	26328562	9403	1396496	Fungi	Chytridiomycota	Chytridiomycetes	Spizellomycetales	Powellomycetaceae	Thoreauomyces	1	2	0	1	0	2	1	1	0	0	0	0	1	4	0	0	1	0	1	0	1	1	0	0	0	0	0	2	1	0
Thyridium curvatum	GCA_004353045.1	40366568	12456	1093900	Fungi	Ascomycota	Sordariomycetes	NA	Thyridiaceae	Thyridium	1	2	1	1	1	1	1	0	0	0	0	1	2	2	4	0	1	1	0	0	0	0	0	0	0	0	1	1	1	0
Tieghemiomyces parasiticus	GCA_027575765.1	50986572	12150	78921	Fungi	Zoopagomycota	Dimargaritomycetes	Dimargaritales	Dimargaritaceae	Tieghemiomyces	2	4	2	0	2	0	0	0	0	0	0	0	0	4	0	0	0	0	2	0	0	2	0	0	0	0	1	0	2	1
Tilletia caries	GCA_001645005.2	28142201	9952	13290	Fungi	Basidiomycota	Exobasidiomycetes	Tilletiales	Tilletiaceae	Tilletia	2	1	1	1	1	0	1	0	0	1	0	0	0	1	0	0	0	0	0	0	0	0	0	0	0	0	1	0	1	0
Tilletia controversa	GCA_001645045.2	29878810	9887	13291	Fungi	Basidiomycota	Exobasidiomycetes	Tilletiales	Tilletiaceae	Tilletia	2	1	1	1	1	0	1	0	0	1	0	0	0	1	0	0	1	0	0	0	0	0	0	0	0	0	1	0	1	0
Tilletia indica	GCA_001645015.2	28953272	9664	43049	Fungi	Basidiomycota	Exobasidiomycetes	Tilletiales	Tilletiaceae	Tilletia	2	1	1	1	1	0	1	0	0	1	0	0	0	0	0	0	0	0	0	0	0	0	0	0	0	0	1	0	1	0
Tilletiaria anomala	GCA_000711695.1	18704010	6808	5281	Fungi	Basidiomycota	Exobasidiomycetes	Georgefischeriales	Tilletiariaceae	Tilletiaria	0	1	1	1	1	0	1	0	0	0	0	0	1	1	0	0	1	0	0	1	1	0	0	0	0	0	1	0	0	1
Tilletiopsis washingtonensis	GCA_003144115.1	18761941	7005	58919	Fungi	Basidiomycota	Exobasidiomycetes	Entylomatales	NA	Tilletiopsis	1	1	1	1	1	0	1	0	0	0	0	0	0	1	0	0	1	0	0	0	1	0	0	0	0	0	1	0	0	0
Tirmania nivea	GCA_015179035.1	63133441	10591	160517	Fungi	Ascomycota	Pezizomycetes	Pezizales	Pezizaceae	Tirmania	1	1	1	1	0	1	1	0	0	0	0	0	2	1	0	0	0	1	0	0	0	0	0	0	0	0	0	1	1	0
Toensbergia leucococca	GCA_022813965.1	26834326	8691	1453789	Fungi	Ascomycota	Lecanoromycetes	Rhizocarpales	Sporastatiaceae	Toensbergia	1	1	1	1	1	0	1	0	0	0	0	0	0	1	0	0	1	2	0	0	0	0	0	0	0	0	0	0	1	0
Tolypocladium capitatum	GCA_002901185.1	22985095	7534	45235	Fungi	Ascomycota	Sordariomycetes	Hypocreales	Ophiocordycipitaceae	Tolypocladium	1	1	1	1	1	1	1	0	0	0	0	0	1	1	1	0	1	1	0	0	0	0	0	0	0	0	1	1	1	0
Tolypocladium ophioglossoides	GCA_001189435.1	31245833	9158	71617	Fungi	Ascomycota	Sordariomycetes	Hypocreales	Ophiocordycipitaceae	Tolypocladium	0	1	1	1	1	1	1	0	0	0	0	0	1	1	1	0	1	1	0	0	0	0	0	0	0	0	1	0	1	0
Tolypocladium paradoxum	GCA_002916505.1	27610157	8913	94208	Fungi	Ascomycota	Sordariomycetes	Hypocreales	Ophiocordycipitaceae	Tolypocladium	1	1	1	1	1	1	1	0	0	0	0	0	1	1	1	0	0	1	0	0	0	0	0	0	0	0	1	0	2	0
Torrubiella hemipterigena	GCA_000825705.1	28476206	10773	1531966	Fungi	Ascomycota	Sordariomycetes	Hypocreales	Clavicipitaceae	Torrubiella	1	1	1	1	1	1	1	0	0	0	0	0	2	1	1	0	0	1	1	0	0	0	0	0	0	0	1	0	3	0
Tortispora caseinolytica	GCA_001661475.1	9180161	4656	51930	Fungi	Ascomycota	Saccharomycetes	Saccharomycetales	Trigonopsidaceae	Tortispora	0	1	1	1	1	0	1	0	0	0	0	0	0	0	0	0	0	0	1	0	0	0	0	0	0	0	1	1	1	1
Torulaspora delbrueckii	GCA_000243375.1	9220678	4972	4950	Fungi	Ascomycota	Saccharomycetes	Saccharomycetales	Saccharomycetaceae	Torulaspora	0	1	1	0	1	0	0	0	0	0	0	0	0	0	0	0	0	0	1	0	1	0	0	0	0	0	1	2	0	1
Torulaspora globosa	GCA_014133895.1	9281121	4931	48254	Fungi	Ascomycota	Saccharomycetes	Saccharomycetales	Saccharomycetaceae	Torulaspora	0	1	1	0	1	0	0	0	0	0	0	0	0	0	0	0	0	0	1	0	1	0	0	0	0	0	1	2	0	1
Tothia fuscella	GCA_010583015.1	36781754	13684	1048955	Fungi	Ascomycota	Dothideomycetes	Venturiales	Cylindrosympodiaceae	Tothia	1	1	1	1	1	1	1	0	1	0	0	0	10	1	6	0	0	3	1	1	1	0	0	0	7	0	1	1	1	0
Trachipleistophora hominis	GCA_000316135.1	8498182	3212	72359	Fungi	Microsporidia	NA	NA	Pleistophoridae	Trachipleistophora	0	2	0	0	0	1	0	0	0	0	0	0	0	0	0	0	0	0	0	0	0	0	0	0	0	0	0	0	0	0
Trametes cinnabarina	GCA_000765035.1	33668918	10233	5643	Fungi	Basidiomycota	Agaricomycetes	Polyporales	Polyporaceae	Trametes	2	1	1	1	0	1	0	0	0	0	0	0	3	1	0	0	1	0	1	1	1	1	0	0	0	0	1	0	0	0
Trametes pubescens	GCA_001895945.1	39739821	14438	154538	Fungi	Basidiomycota	Agaricomycetes	Polyporales	Polyporaceae	Trametes	1	1	1	1	1	1	0	0	0	0	0	0	3	2	0	2	1	0	1	1	1	0	0	0	0	0	1	0	0	1
Trametes versicolor	GCA_000271585.1	44794008	14302	5325	Fungi	Basidiomycota	Agaricomycetes	Polyporales	Polyporaceae	Trametes	2	1	1	1	1	1	0	0	0	0	0	0	3	2	0	2	1	0	1	1	1	1	0	0	0	0	1	1	1	1
Trametopsis cervina	GCA_022385755.1	29819895	11835	1111950	Fungi	Basidiomycota	Agaricomycetes	Polyporales	Irpicaceae	Trametopsis	1	1	1	1	1	1	0	1	0	0	0	0	5	2	0	0	0	0	1	1	1	1	0	0	0	0	1	1	1	0
Trapelia coarctata	GCA_022813945.1	33968085	9391	129515	Fungi	Ascomycota	Lecanoromycetes	Trapeliales	Trapeliaceae	Trapelia	1	1	2	1	1	1	1	0	0	0	0	0	1	1	0	0	0	0	0	0	0	0	0	0	0	0	1	1	1	0
Trematosphaeria pertusa	GCA_010094035.1	47745773	17304	390896	Fungi	Ascomycota	Dothideomycetes	Pleosporales	Trematosphaeriaceae	Trematosphaeria	1	1	1	2	1	2	1	0	1	2	0	0	7	1	5	0	2	1	1	1	0	0	0	0	1	0	1	1	2	0
Tremella mesenterica	GCA_000271645.1	28639919	8308	5217	Fungi	Basidiomycota	Tremellomycetes	Tremellales	Tremellaceae	Tremella	1	1	1	1	1	0	0	0	0	1	0	0	1	1	0	0	1	0	0	1	1	0	0	0	0	0	1	1	0	1
Tricharina praecox	GCA_024521635.1	38357564	10413	43433	Fungi	Ascomycota	Pezizomycetes	Pezizales	Pyronemataceae	Tricharina	1	1	1	1	0	1	1	0	0	0	0	0	1	1	0	0	0	0	0	1	0	0	0	0	0	0	1	0	1	0
Trichodelitschia bisporula	GCA_010356995.1	25789561	10178	703511	Fungi	Ascomycota	Dothideomycetes	Phaeotrichales	Phaeotrichaceae	Trichodelitschia	1	1	1	1	1	1	1	0	0	0	0	0	1	1	4	0	0	1	1	1	0	0	0	0	0	0	1	1	1	0
Trichoderma atroviride	GCA_000171015.2	36143664	11809	63577	Fungi	Ascomycota	Sordariomycetes	Hypocreales	Hypocreaceae	Trichoderma	1	1	1	1	1	1	0	0	0	0	0	0	3	2	1	0	1	1	0	0	0	0	0	0	0	0	1	2	2	0
Trichoderma reesei	GCA_000167675.2	33395713	9113	51453	Fungi	Ascomycota	Sordariomycetes	Hypocreales	Hypocreaceae	Trichoderma	1	1	1	1	1	1	1	0	0	0	0	0	0	2	0	0	0	1	0	0	0	0	0	0	0	0	1	1	2	0
Trichoderma virens	GCA_000170995.2	39022666	12405	29875	Fungi	Ascomycota	Sordariomycetes	Hypocreales	Hypocreaceae	Trichoderma	1	1	1	1	1	1	1	0	0	0	0	0	1	2	1	0	0	1	0	0	0	0	0	0	0	0	1	2	2	0
Trichoglossum hirsutum	GCA_020080795.1	28857112	8949	265104	Fungi	Ascomycota	Geoglossomycetes	Geoglossales	Geoglossaceae	Trichoglossum	1	1	1	1	1	1	1	0	0	0	0	0	1	1	0	0	1	1	0	0	0	0	0	0	0	0	1	0	0	0
Tricholoma furcatifolium	GCA_018854895.1	49805319	15788	2724999	Fungi	Basidiomycota	Agaricomycetes	Agaricales	Tricholomataceae	Tricholoma	0	1	1	1	0	0	0	0	1	0	0	0	1	2	0	6	0	0	1	1	1	1	0	0	0	0	1	0	0	0
Tricholoma matsutake	GCA_014904895.1	175758422	22777	40145	Fungi	Basidiomycota	Agaricomycetes	Agaricales	Tricholomataceae	Tricholoma	2	1	1	7	1	2	0	0	1	0	0	0	1	2	0	3	0	0	1	0	1	1	0	0	0	0	1	0	1	0
Tricholomella constricta	GCA_013368375.1	44412325	10603	117010	Fungi	Basidiomycota	Agaricomycetes	Agaricales	Lyophyllaceae	Tricholomella	1	1	1	1	1	1	0	0	1	0	0	0	1	2	0	6	0	0	1	1	1	1	0	0	0	0	1	1	1	0
Trichomonascus ciferrii	GCA_008704605.1	20534176	6903	44093	Fungi	Ascomycota	Saccharomycetes	Saccharomycetales	Trichomonascaceae	Trichomonascus	0	0	1	1	1	0	1	0	1	0	0	0	0	1	0	0	0	0	1	0	1	0	0	0	0	0	1	2	1	1
Trichophaea hybrida	GCA_015178995.1	144183925	13306	47213	Fungi	Ascomycota	Pezizomycetes	Pezizales	Pyronemataceae	Trichophaea	1	1	1	1	1	1	1	0	0	0	0	0	3	1	0	0	1	0	0	1	0	0	0	0	0	0	1	1	1	0
Trichophyton benhamiae	GCA_000151125.2	22224160	7980	63400	Fungi	Ascomycota	Eurotiomycetes	Onygenales	Arthrodermataceae	Trichophyton	1	1	1	1	1	0	1	1	0	0	0	0	1	1	0	0	1	2	0	0	0	0	0	0	0	0	1	0	0	0
Trichophyton equinum	GCA_000151175.1	24158205	8676	63418	Fungi	Ascomycota	Eurotiomycetes	Onygenales	Arthrodermataceae	Trichophyton	1	1	1	1	1	0	0	1	0	0	0	0	1	1	0	0	1	2	0	0	0	0	0	0	0	0	1	0	0	0
Trichophyton rubrum	GCA_000151425.1	22530013	8616	5551	Fungi	Ascomycota	Eurotiomycetes	Onygenales	Arthrodermataceae	Trichophyton	1	1	1	1	1	0	1	1	0	0	0	0	1	1	0	0	1	2	0	0	0	0	0	0	0	0	1	1	0	0
Trichosporon asahii	GCA_000293215.1	24540311	8311	82508	Fungi	Basidiomycota	Tremellomycetes	Trichosporonales	Trichosporonaceae	Trichosporon	1	0	2	0	1	0	0	0	1	0	0	0	3	1	0	0	0	1	0	1	0	0	0	0	0	0	1	0	0	1
Trichothecium roseum	GCA_026184415.1	33510174	9102	47278	Fungi	Ascomycota	Sordariomycetes	Hypocreales	NA	Trichothecium	1	1	1	1	1	0	1	0	0	0	0	0	3	0	0	0	1	1	0	0	0	0	0	0	0	0	1	0	2	0
Truncatella angustata	GCA_020726525.1	47102642	14775	152316	Fungi	Ascomycota	Sordariomycetes	Xylariales	Sporocadaceae	Truncatella	1	1	1	1	0	3	1	0	0	0	0	0	8	2	3	0	1	1	0	0	0	0	0	0	0	0	1	0	2	0
Tuber borchii	GCA_003070745.1	97184993	12345	42251	Fungi	Ascomycota	Pezizomycetes	Pezizales	Tuberaceae	Tuber	1	1	1	1	0	1	1	0	0	0	0	0	2	1	0	0	4	0	0	0	0	0	0	0	0	0	0	0	1	0
Tuber magnatum	GCA_003182015.1	192781443	9431	42249	Fungi	Ascomycota	Pezizomycetes	Pezizales	Tuberaceae	Tuber	1	1	1	1	1	1	1	0	0	0	0	0	2	1	0	0	1	0	0	1	0	0	0	0	0	0	0	1	1	0
Tuber melanosporum	GCA_000151645.1	124945702	7496	39416	Fungi	Ascomycota	Pezizomycetes	Pezizales	Tuberaceae	Tuber	1	1	1	1	0	1	1	0	0	0	0	0	0	1	0	0	1	0	0	0	0	0	0	0	0	0	0	1	1	0
Tubulinosema ratisbonensis	GCA_004000155.1	7560420	3013	291195	Fungi	Microsporidia	NA	NA	Tubulinosematidae	Tubulinosema	0	1	0	0	0	1	0	0	0	0	0	0	0	0	0	0	0	0	0	0	0	0	0	0	0	0	0	0	0	0
Tulasnella calospora	GCA_000827465.1	62392858	19545	156515	Fungi	Basidiomycota	Agaricomycetes	Cantharellales	Tulasnellaceae	Tulasnella	2	2	2	2	0	1	0	0	0	0	0	0	3	3	0	0	3	0	0	0	1	0	0	0	0	0	1	0	1	1
Tulosesus angulatus	GCA_013368325.1	59300204	15072	980116	Fungi	Basidiomycota	Agaricomycetes	Agaricales	Psathyrellaceae	Tulosesus	2	1	1	4	4	2	0	0	0	0	0	0	1	2	0	4	0	0	1	1	1	1	0	0	0	0	1	0	0	0
Umbelopsis isabellina	GCA_016758905.1	22055682	9033	91625	Fungi	Mucoromycota	Umbelopsidomycetes	Umbelopsidales	Umbelopsidaceae	Umbelopsis	1	1	1	0	0	0	0	1	1	0	0	0	0	3	0	0	0	0	1	1	1	1	1	1	0	1	1	1	1	1
Umbelopsis ramanniana	GCA_025399195.1	23077072	9918	41833	Fungi	Mucoromycota	Umbelopsidomycetes	Umbelopsidales	Umbelopsidaceae	Umbelopsis	1	1	1	1	0	0	1	0	1	0	0	0	0	4	0	0	0	0	1	1	1	1	0	1	0	1	1	2	1	1
Umbelopsis vinacea	GCA_016758895.1	23182286	9240	44442	Fungi	Mucoromycota	Umbelopsidomycetes	Umbelopsidales	Umbelopsidaceae	Umbelopsis	1	1	1	1	0	0	1	0	1	0	0	0	0	4	0	0	0	0	1	0	1	1	1	1	0	1	1	2	1	1
Umbilicaria vellea	GCA_023645895.1	28684165	7084	87287	Fungi	Ascomycota	Lecanoromycetes	Umbilicariales	Umbilicariaceae	Umbilicaria	1	1	2	1	1	1	1	0	0	0	0	0	1	0	0	0	0	0	0	0	0	0	0	0	0	0	1	0	1	0
Uncinocarpus reesii	GCA_000003515.2	22349738	7760	33188	Fungi	Ascomycota	Eurotiomycetes	Onygenales	Onygenaceae	Uncinocarpus	1	1	1	1	1	0	1	1	0	0	0	0	3	1	0	0	0	2	0	0	0	0	0	0	0	0	1	1	1	0
Usnochroma carphineum	GCA_023645975.1	36978210	8306	1301586	Fungi	Ascomycota	Lecanoromycetes	Teloschistales	Teloschistaceae	Usnochroma	1	1	1	1	1	0	1	0	0	0	0	0	0	0	0	0	0	1	0	0	0	0	0	0	0	0	0	0	1	0
Ustilaginoidea virens	GCA_000687475.2	37158136	8297	1159556	Fungi	Ascomycota	Sordariomycetes	Hypocreales	Clavicipitaceae	Ustilaginoidea	1	1	1	1	1	1	1	0	0	0	0	0	1	1	1	0	0	1	0	0	0	0	0	0	0	0	1	2	1	0
Ustilago hordei	GCA_000286035.1	21150702	7111	120017	Fungi	Basidiomycota	Ustilaginomycetes	Ustilaginales	Ustilaginaceae	Ustilago	1	1	1	1	1	0	1	0	1	0	0	0	0	1	0	0	1	0	0	1	1	0	0	0	0	0	1	0	0	0
Ustilago maydis	GCA_000328475.2	19664356	6765	5270	Fungi	Basidiomycota	Ustilaginomycetes	Ustilaginales	Ustilaginaceae	Ustilago	1	1	1	1	1	0	1	0	1	0	0	0	0	1	0	0	1	0	0	1	1	0	0	0	0	0	1	0	0	0
Ustulina deusta	GCA_022496955.1	49727278	12519	110526	Fungi	Ascomycota	Sordariomycetes	Xylariales	Xylariaceae	Kretzschmaria	1	1	1	1	1	1	1	0	0	0	0	0	6	2	3	0	1	1	0	0	0	0	0	0	0	0	1	0	1	0
Valsa mali	GCA_000813385.1	35730243	10855	105487	Fungi	Ascomycota	Sordariomycetes	Diaporthales	Valsaceae	Valsa	1	1	1	1	1	1	2	0	0	0	0	0	3	2	2	0	1	1	1	0	0	0	0	0	0	0	1	1	1	0
Valsa sordida	GCA_003795275.1	36158412	9828	252740	Fungi	Ascomycota	Sordariomycetes	Diaporthales	Valsaceae	Valsa	1	1	1	1	1	1	1	0	0	0	0	0	3	2	1	0	0	1	1	0	0	0	0	0	0	0	1	1	1	0
Vanderwaltozyma polyspora	GCA_000150035.1	14674591	5328	36033	Fungi	Ascomycota	Saccharomycetes	Saccharomycetales	Saccharomycetaceae	Vanderwaltozyma	0	1	1	0	2	0	0	0	0	0	0	0	0	0	0	0	0	0	0	0	1	0	0	0	0	0	1	2	0	1
Vanrija humicola	GCA_008065275.1	22632906	4376	5417	Fungi	Basidiomycota	Tremellomycetes	Trichosporonales	Trichosporonaceae	Vanrija	0	0	2	0	1	0	0	0	0	0	0	0	0	0	0	0	0	0	0	1	1	0	0	0	0	0	1	0	0	0
Vararia minispora	GCA_022160365.1	36812209	10966	1314805	Fungi	Basidiomycota	Agaricomycetes	Russulales	Lachnocladiaceae	Vararia	3	1	1	1	1	2	0	1	1	0	0	0	0	2	0	2	0	0	0	1	1	1	0	0	0	0	1	1	0	0
Varicellaria rhodocarpa	GCA_022813925.1	80858204	10754	160984	Fungi	Ascomycota	Lecanoromycetes	Pertusariales	Pertusariaceae	Varicellaria	1	1	1	1	1	1	1	0	0	0	0	0	4	2	0	0	1	2	0	1	0	0	0	0	0	0	1	1	1	0
Variospora aurantia	GCA_023645955.1	24794364	7778	1301589	Fungi	Ascomycota	Lecanoromycetes	Teloschistales	Teloschistaceae	Variospora	1	1	1	1	1	0	1	0	0	0	0	0	2	1	0	0	0	1	0	0	0	0	0	0	0	0	0	0	0	0
Vavraia culicis	GCA_000192795.1	6118689	2773	103449	Fungi	Microsporidia	NA	NA	Pleistophoridae	Vavraia	0	2	0	0	0	1	0	0	0	0	0	0	0	0	0	0	0	0	0	0	0	0	0	0	0	0	0	0	0	0
Venturia inaequalis	GCA_003351075.1	72310420	13719	5025	Fungi	Ascomycota	Dothideomycetes	Venturiales	Venturiaceae	Venturia	1	1	1	1	1	0	1	0	0	0	0	0	16	2	6	0	0	3	1	1	0	0	0	0	2	0	1	1	1	0
Venturia nashicola	GCA_004522655.2	40199691	11758	86259	Fungi	Ascomycota	Dothideomycetes	Venturiales	Venturiaceae	Venturia	1	1	1	1	1	0	1	0	0	0	0	0	11	1	5	0	0	2	1	1	0	0	0	0	2	0	1	1	1	0
Venustampulla echinocandica	GCA_003357145.1	33639795	10707	2656787	Fungi	Ascomycota	Leotiomycetes	Helotiales	Pleuroascaceae	Venustampulla	1	1	1	1	0	1	0	0	0	0	0	0	8	2	2	0	2	2	0	0	0	0	0	0	0	0	1	0	1	0
Verruconis gallopava	GCA_000836295.1	31780469	9818	253628	Fungi	Ascomycota	Dothideomycetes	Venturiales	Sympoventuriaceae	Verruconis	1	1	1	1	1	1	2	0	1	0	0	0	4	1	2	0	0	1	1	1	0	0	0	0	0	0	1	0	1	0
Verticillium alfalfae	GCA_000150825.1	32862988	10237	1051613	Fungi	Ascomycota	Sordariomycetes	Glomerellales	Plectosphaerellaceae	Verticillium	0	1	1	1	1	1	0	0	0	1	0	0	0	1	4	0	1	1	0	0	0	0	0	0	0	0	1	0	1	0
Verticillium dahliae	GCA_000150675.2	33900324	10535	27337	Fungi	Ascomycota	Sordariomycetes	Glomerellales	Plectosphaerellaceae	Verticillium	1	1	1	1	1	1	1	0	0	1	0	0	1	1	4	0	1	1	0	0	0	0	0	0	0	0	1	0	1	0
Verticillium longisporum	GCA_001268145.1	99189222	20793	100787	Fungi	Ascomycota	Sordariomycetes	Glomerellales	Plectosphaerellaceae	Verticillium	2	3	3	1	1	3	2	0	0	0	0	0	2	2	7	0	1	1	0	0	0	0	0	0	0	0	2	0	1	0
Violaceomyces palustris	GCA_003144235.1	27323055	8058	1673888	Fungi	Basidiomycota	Ustilaginomycetes	Violaceomycetales	Violaceomycetaceae	Violaceomyces	2	1	1	1	1	0	1	1	1	1	0	0	0	1	0	0	1	0	0	1	1	0	0	0	0	0	1	0	0	1
Viridothelium virens	GCA_010094025.1	32160005	11845	1048519	Fungi	Ascomycota	Dothideomycetes	Trypetheliales	Trypetheliaceae	Viridothelium	1	1	1	1	1	1	1	0	0	0	0	0	4	1	0	0	1	1	0	1	0	0	0	0	0	0	1	1	1	0
Vittaforma corneae	GCA_000231115.1	3213516	2239	42399	Fungi	Microsporidia	NA	NA	Nosematidae	Vittaforma	0	1	0	0	0	1	0	0	0	0	0	0	0	0	0	0	0	0	0	0	0	0	0	0	0	0	0	0	0	0
Volvariella volvacea	GCA_001691835.3	35313785	11047	36659	Fungi	Basidiomycota	Agaricomycetes	Agaricales	Pluteaceae	Volvariella	2	1	1	1	1	0	0	0	0	0	0	0	1	2	0	2	0	0	1	1	1	1	0	0	0	0	1	1	0	0
Wallemia ichthyophaga	GCA_000400465.1	9655632	4865	245174	Fungi	Basidiomycota	Wallemiomycetes	Wallemiales	Wallemiaceae	Wallemia	1	1	1	1	0	0	0	0	0	0	0	0	0	1	1	0	1	0	1	1	0	0	0	0	0	0	1	0	1	1
Wallemia mellicola	GCA_000263375.1	9815586	5277	1708541	Fungi	Basidiomycota	Wallemiomycetes	Wallemiales	Wallemiaceae	Wallemia	0	1	1	1	0	0	0	1	0	0	0	0	0	1	1	0	1	0	1	1	0	0	0	0	0	0	1	1	0	1
Watsoniomyces obsoletus	GCA_026025055.1	27112840	9066	2796175	Fungi	Ascomycota	Lichinomycetes	Lichinales	Lichinaceae	Watsoniomyces	1	1	1	1	0	1	1	0	0	0	0	0	0	1	0	0	0	1	0	0	0	0	0	0	0	0	0	0	1	0
Westerdykella ornata	GCA_010094085.1	26979746	10410	318751	Fungi	Ascomycota	Dothideomycetes	Pleosporales	Sporormiaceae	Westerdykella	1	1	1	1	1	2	1	0	1	0	0	0	4	2	4	0	1	1	1	1	0	0	0	0	0	0	1	1	1	0
Whalleya microplaca	GCA_022497155.1	48317886	12551	110547	Fungi	Ascomycota	Sordariomycetes	Xylariales	Xylariaceae	Whalleya	1	1	1	1	1	1	1	0	0	0	0	0	3	3	5	0	0	1	0	0	0	0	0	0	0	0	1	1	1	0
Wickerhamiella sorbophila	GCA_002251995.2	8152740	4741	45607	Fungi	Ascomycota	Saccharomycetes	Saccharomycetales	Trichomonascaceae	Wickerhamiella	0	1	1	1	1	0	1	0	0	0	0	0	0	0	0	0	0	0	0	0	1	0	0	0	0	0	1	1	1	1
Wickerhamomyces anomalus	GCA_001661255.1	14145566	6421	4927	Fungi	Ascomycota	Saccharomycetes	Saccharomycetales	Phaffomycetaceae	Wickerhamomyces	0	1	1	1	1	0	1	0	0	0	0	0	0	0	0	0	0	0	1	0	1	0	0	0	0	0	1	2	1	0
Wickerhamomyces ciferrii	GCA_000313485.1	15901152	6702	1041607	Fungi	Ascomycota	Saccharomycetes	Saccharomycetales	Phaffomycetaceae	Wickerhamomyces	0	1	1	1	1	0	1	0	0	0	0	0	0	0	0	0	0	0	1	0	1	0	0	0	0	0	1	3	1	0
Wickerhamomyces mucosus	GCA_020536175.1	12971317	5971	1378264	Fungi	Ascomycota	Saccharomycetes	Saccharomycetales	Phaffomycetaceae	Wickerhamomyces	0	1	1	0	1	0	0	0	0	0	0	0	0	0	0	0	0	0	1	0	1	0	0	0	0	0	1	1	1	0
Wilcoxina mikolae	GCA_014904905.1	117288895	13049	43439	Fungi	Ascomycota	Pezizomycetes	Pezizales	Pyronemataceae	Wilcoxina	1	1	1	1	1	1	1	0	0	0	0	0	0	1	0	0	1	0	0	1	0	0	0	0	0	0	1	1	1	0
Wolfiporia cocos	GCA_000344635.1	50483556	12212	81056	Fungi	Basidiomycota	Agaricomycetes	Polyporales	Laetiporaceae	Wolfiporia	2	1	1	1	1	0	0	0	1	0	0	0	2	2	0	0	2	0	1	2	1	1	0	0	0	0	1	1	1	1
Xanthomendoza cf.	GCA_023646365.1	29798617	8754	2903221	Fungi	Ascomycota	Lecanoromycetes	Teloschistales	Teloschistaceae	Xanthomendoza	1	1	1	1	1	0	1	0	0	0	0	0	1	1	0	0	1	1	0	0	0	0	0	0	0	0	0	1	1	0
Xanthoria aureola	GCA_023646375.1	38521550	9875	262315	Fungi	Ascomycota	Lecanoromycetes	Teloschistales	Teloschistaceae	Xanthoria	1	1	1	1	1	0	1	0	0	1	0	0	2	1	0	0	0	1	0	0	0	0	0	0	0	0	0	2	1	0
Xanthoria mediterranea	GCA_023645845.1	32477199	8998	408593	Fungi	Ascomycota	Lecanoromycetes	Teloschistales	Teloschistaceae	Xanthoria	1	1	1	1	1	0	1	0	0	0	0	0	2	1	0	0	0	0	0	0	0	0	0	0	0	0	0	1	1	0
Xanthoria steineri	GCA_023646075.1	30643944	9445	2905939	Fungi	Ascomycota	Lecanoromycetes	Teloschistales	Teloschistaceae	Xanthoria	0	1	1	1	1	0	1	0	0	0	0	0	2	1	0	0	0	0	0	0	0	0	0	0	0	0	0	0	1	0
Xylaria grammica	GCA_004014815.1	47039127	12126	363999	Fungi	Ascomycota	Sordariomycetes	Xylariales	Xylariaceae	Xylaria	1	1	1	1	1	1	1	0	0	0	0	0	5	2	3	0	1	1	0	0	0	0	0	0	0	0	1	1	1	0
Xylaria longipes	GCA_003426265.1	43191891	12638	114818	Fungi	Ascomycota	Sordariomycetes	Xylariales	Xylariaceae	Xylaria	1	1	1	1	1	1	1	0	0	0	0	0	5	2	2	0	1	1	0	0	0	0	0	0	0	0	1	1	1	0
Xylaria polymorpha	GCA_003426235.1	43516978	12349	77046	Fungi	Ascomycota	Sordariomycetes	Xylariales	Xylariaceae	Xylaria	1	1	1	1	1	1	1	0	0	0	0	0	2	2	4	0	1	0	0	0	0	0	0	0	0	0	1	1	1	0
Xylographa soralifera	GCA_022813805.1	38053883	10250	1590126	Fungi	Ascomycota	Lecanoromycetes	Trapeliales	Trapeliaceae	Xylographa	1	1	1	1	1	1	1	0	0	0	0	0	2	1	0	0	0	1	0	0	0	0	0	0	0	0	1	2	1	0
Xylographa trunciseda	GCA_022813785.1	26804174	9125	1453799	Fungi	Ascomycota	Lecanoromycetes	Trapeliales	Trapeliaceae	Xylographa	1	1	1	1	1	1	0	0	0	0	0	0	1	1	0	0	0	1	0	1	0	0	0	0	0	0	1	0	1	0
Xylographa vitiligo	GCA_022813765.1	31360640	8652	223429	Fungi	Ascomycota	Lecanoromycetes	Trapeliales	Trapeliaceae	Xylographa	1	1	2	1	1	0	1	0	0	0	0	0	0	1	0	0	0	1	0	0	0	0	0	0	0	0	1	0	1	0
Xylona heveae	GCA_001619985.1	24337763	8201	1217826	Fungi	Ascomycota	Xylonomycetes	Xylonales	Xylonaceae	Xylona	1	1	1	1	1	1	1	0	1	0	0	0	0	1	0	0	0	1	0	1	0	0	0	0	0	0	1	0	1	0
Yamadazyma tenuis	GCA_000223465.1	10747050	5547	2315449	Fungi	Ascomycota	Saccharomycetes	Saccharomycetales	Debaryomycetaceae	Yamadazyma	0	1	1	0	0	0	0	0	0	0	0	0	0	0	0	0	0	0	1	0	1	0	0	0	0	0	1	1	1	0
Yarrowia lipolytica	GCA_000002525.1	20502981	6448	4952	Fungi	Ascomycota	Saccharomycetes	Saccharomycetales	Dipodascaceae	Yarrowia	0	1	1	1	1	0	1	0	0	0	0	0	0	1	0	0	0	0	0	0	1	0	0	0	0	0	1	2	1	1
Zalerion maritima	GCA_022664585.2	58428487	10669	339359	Fungi	Ascomycota	Sordariomycetes	Lulworthiales	Lulworthiaceae	Zalerion	1	1	1	1	1	1	1	0	0	0	0	0	3	1	1	0	1	1	1	0	0	0	0	0	0	0	1	2	3	0
Zancudomyces culisetae	GCA_001969505.1	28700372	8068	1213189	Fungi	Zoopagomycota	Harpellomycetes	Harpellales	Legeriomycetaceae	Zancudomyces	1	1	0	2	0	0	0	0	0	0	0	0	0	2	0	0	0	0	0	1	0	0	0	0	0	0	0	0	0	0
Zasmidium cellare	GCA_010093935.1	38247703	16015	395010	Fungi	Ascomycota	Dothideomycetes	Mycosphaerellales	Mycosphaerellaceae	Zasmidium	1	1	1	1	1	1	1	0	0	0	0	0	10	1	0	1	4	2	1	1	0	0	0	0	0	0	1	0	1	0
Zopfia rhizophila	GCA_010093925.1	152781427	21640	160035	Fungi	Ascomycota	Dothideomycetes	NA	Zopfiaceae	Zopfia	1	1	1	4	1	2	1	0	1	0	0	1	7	1	4	0	2	1	1	1	0	0	0	0	0	0	1	1	1	0
Zopfochytrium polystomum	GCA_025765615.1	81192468	16588	2211651	Fungi	Chytridiomycota	Chytridiomycetes	Chytridiales	Chytridiaceae	Zopfochytrium	0	1	2	2	0	0	1	1	0	1	4	0	0	3	0	0	0	0	3	0	0	0	0	0	0	0	0	4	1	0
Zychaea mexicana	GCA_025766255.1	50638590	13989	64656	Fungi	Mucoromycota	Mucoromycetes	Mucorales	Lichtheimiaceae	Zychaea	1	1	1	1	0	0	1	1	1	0	0	0	0	3	0	0	0	0	1	1	1	1	1	0	0	1	1	1	1	0
Zygosaccharomyces bailii	GCA_000442885.1	10268813	4723	4954	Fungi	Ascomycota	Saccharomycetes	Saccharomycetales	Saccharomycetaceae	Zygosaccharomyces	0	1	1	0	0	0	0	0	0	0	0	0	0	0	0	0	0	0	1	0	1	0	0	0	0	0	1	2	0	0
Zygosaccharomyces rouxii	GCA_000026365.1	9764635	4991	4956	Fungi	Ascomycota	Saccharomycetes	Saccharomycetales	Saccharomycetaceae	Zygosaccharomyces	0	1	1	0	1	0	0	0	0	0	0	0	0	0	0	0	0	0	1	0	1	0	0	0	0	0	1	2	0	0
Zygotorulaspora mrakii	GCA_013402915.1	10450160	5041	42260	Fungi	Ascomycota	Saccharomycetes	Saccharomycetales	Saccharomycetaceae	Zygotorulaspora	0	1	1	0	1	0	0	0	0	0	0	0	0	0	0	0	0	0	0	0	1	0	0	0	0	0	1	2	1	0
Zymoseptoria brevis	GCA_000966595.1	31914300	10566	1047168	Fungi	Ascomycota	Dothideomycetes	Mycosphaerellales	Mycosphaerellaceae	Zymoseptoria	1	1	1	1	1	1	1	0	0	0	0	0	5	1	0	0	2	2	1	0	0	0	0	0	0	0	1	1	1	0
Zymoseptoria tritici	GCA_000219625.1	39686251	10963	1047171	Fungi	Ascomycota	Dothideomycetes	Mycosphaerellales	Mycosphaerellaceae	Zymoseptoria	1	1	1	1	1	1	1	0	0	0	0	0	4	1	0	0	2	1	1	1	0	0	0	0	0	0	0	1	0	0
