# Supplementary material for: Synergistic regulation by H3K36 and H3K27 methylation defines the chromatin landscape to control virulence and secondary metabolism in a fungal pathogen
Source: HighWire-hosted journal article supplement (doi:10.1101/gr.280560.125), 2025-10-14
Supplement: Supplemental_Table_S2.xlsx [file Supplemental_Table_S2.xlsx]

## Sheet: Sheet1
Supplemental Table S2. Clustering of representative histone methyltransferases from fungi
Cluster	Group	Modification sites	Species	Accession
Cluster1	Group 15	H3K36	Aspergillus flavus	KOC13956.1
	Group 06	H3K36	Aspergillus flavus	KOC07657.1
	Group 06	H3K36	Aspergillus nidulans	CBF77940.1
	Group 06	H3K36	Apophysomyces ossiformis	KAF7732537.1
	Group 06	H3K36	Beauveria bassiana	EJP64008.1
	Group 15	H3K36	Beauveria bassiana	EJP63307.1
	Group 06	H3K36	Fusarium fujikuroi	CCT71254.1
	Group 15	H3K36	Fusarium fujikuroi	CCT69746.1
	Group 15	H3K36	Neurospora crassa	EAA34880.3
	Group 06	H3K36	Neurospora crassa	EAA28504.1
	Group 06	H3K36	Saccharomyces cerevisiae	DAA08635.2
	Group 06	H3K36	Schizosaccharomyces pombe	CAB16247.1
Cluster1	Group 03	H3K9	Aspergillus nidulans	CBF88005.1
	Group 03	H3K9	Borealophlyctis nickersoniae	KAJ3284916.1
	Group 03	H3K9	Fusarium fujikuroi	KLO87227.1
	Group 03	H3K9	Neurospora crassa	EAA30745.1
	Group 03	H3K9	Neurospora crassa	EAA30745.1
	Group 03	H3K9	Neurospora tetrasperma	EGO59396.1
	Group 03	H3K9	Plenodomus lingam	CBX92341.1
	Group 03	H3K9	Podospora anserina	CAP71544.1
	Group 03	H3K9	Schizosaccharomyces pombe	CAA22283.1
	Group 03	H3K9	Trichoderma reesei	EGR45341.1
Cluster1	Group 04	H3K4	Trichophyton rubrum	EGD85405.14
	Group 04	H3K4	Uncinocarpus reesii	EEP82956.1
	Group 04	H3K4	Verticillium alfalfae	EEY18089.1
	Group 04	H3K4	Coprinopsis cinerea	EFI27500.1
	Group 04	H3K4	Parastagonospora nodorum	EAT89008.1
	Group 04	H3K4	Coprinopsis cinerea	EFI27500.1
	Group 04	H3K4	Pyricularia oryzae	EHA55222.1
	Group 04	H3K4	Fusarium graminearum	ESU13710.1
	Group 04	H3K4	Fusarium oxysporum	KNA96138.1
	Group 04	H3K4	Neurospora crassa	EAA32336.3
	Group 04	H3K4	Metarhizium robertsii	EFY97601.2
	Group 04	H3K4	Pyricularia oryzae	EHA55222.1
	Group 04	H3K4	Metarhizium robertsii	EFY97601.2
	Group 04	H3K4	Metarhizium acridum	EFY91529.1
	Group 04	H3K4	Aspergillus nidulans	CBF81174.1
	Group 04	H3K4	Aspergillus clavatus	EAW11121.1
	Group 04	H3K4	Coccidioides immitis	EAS31778.3
	Group 04	H3K4	Jimgerdemannia flammicorona	RUP48688.1
	Group 04	H3K4	Dactylellina haptotyla	EPS35842.1
	Group 04	H3K4	Orbilia oligospora	EGX50801.1
	Group 04	H3K4	Aspergillus flavus	KOC09802.1
	Group 04	H3K4	Saccharomyces cerevisiae	DAA06813.1
	Group 04	H3K4	Schizosaccharomyces pombe	CAB41652.1
	Group 04	H3K4	Schizosaccharomyces cryophilus	EPY49986.1
	Group 04	H3K4	Schizosaccharomyces japonicus	EEB05744.1
	Group 04	H3K4	Pyrenophora tritici-repentis	EDU41796.1
	Group 04	H3K4	Pochonia chlamydosporia	OAQ63536.1
Cluster1	Group 07	H4K20	Fusarium graminearum	ESU12633.1
	Group 07	H4K20	Fusarium oxysporum	KNA97962.1
	Group 07	H4K20	Neurospora crassa	EAA33797.2
	Group 07	H4K20	Aspergillus nidulans	CBF70089.1
	Group 07	H4K20	Aspergillus flavus	KOC16130.1
	Group 07	H4K20	Schizosaccharomyces pombe	CAB60686.1
Cluster1	Group 14	H3K27	Fusarium graminearum	ESU06148.1
	Group 14	H3K27	Fusarium fujikuroi	KLO79406.1
	Group 14	H3K27	Neurospora crassa	EAA35807.2
	Group 14	H3K27	Podospora comata	VBB72113.1
