# Supplementary material for: Synergistic regulation by H3K36 and H3K27 methylation defines the chromatin landscape to control virulence and secondary metabolism in a fungal pathogen
Source: HighWire-hosted journal article supplement (doi:10.1101/gr.280560.125), 2025-10-14
Supplement: Supplemental_Table_S4.xlsx [file Supplemental_Table_S4.xlsx]

## Sheet: Sheet1
Supplemental Table S4. Summary of SET domain proteins from F. graminearum
Cluster	Group	Gene name	Accession	Interpro Description	Description	Activity Sites
1	14	FgKmt6	FGRAMPH1_01G02263	SET domain;EZH2, N-terminal domain;MCSS domain;Pre-SET CXC domain	polycomb group medea	H3K27
1	3	FgKmt1	FGRAMPH1_01G06669	SET domain;Pre-SET domain	histone-lysine N-methyltransferase	H3K9
1	15	FgAsh1	FGRAMPH1_01G11173	SET domain;Post-SET domain;AWS domain	histone-lysine n-methyltransferase ash1	H3K36
1	6	FgSet2	FGRAMPH1_01G18203	WW domain;SET domain;Post-SET domain;AWS domain;Set2 Rpb1 interacting domain	SET2_GIBZE ame: Full	H3K36
1	7	FgKmt5	FGRAMPH1_01G22513	SET domain;Histone-lysine N-methyltransferase KMT5B/KMT5C/SET9	histone-lysine n-methyltransferase set9	H4K20
1	4	FgSet1	FGRAMPH1_01G24837	SET domain;COMPASS complex Set1 subunit	histone-lysine n- h3 lysine-4 specific	H3K4
1	11	FgSet3	FGRAMPH1_01G26739	SET domain;Zinc finger, PHD-type;Zinc finger, FYVE/PHD-type;Zinc finger, PHD-finger	set domain-containing 3
2	13		FGRAMPH1_01G00137	SET domain;Tetratricopeptide-like helical domain superfamily	unc-45 like B
2	2		FGRAMPH1_01G02897	SET domain;Zinc finger, MYND-type	SET and MYND
2	1		FGRAMPH1_01G03439	SET domain	set 5
2	17		FGRAMPH1_01G13627	SET domain	hypothetical protein
2	13		FGRAMPH1_01G13817	SET domain;Tetratricopeptide-like helical domain superfamily	SET and MYND domain-containing 3
2	13		FGRAMPH1_01G15801	SET domain;Tetratricopeptide-like helical domain superfamily	unnamed protein product
2	1		FGRAMPH1_01G18681	SET domain	set domain-containing 5
2	1		FGRAMPH1_01G21649	SET domain;Zinc finger, MYND-type	unnamed protein product
2	1		FGRAMPH1_01G21673	SET domain	set 5
2	16		FGRAMPH1_01G23783	SET domain;Zinc finger, MYND-type	hypothetical protein
3	5		FGRAMPH1_01G28199	SET domain;N-lysine methyltransferase SETD6;Rubisco LSMT, substrate-binding domain	ribosomal n-lysine methyltransferase 4
3	12		FGRAMPH1_01G11023	SET domain	Ribosomal N-lysine methyltransferase set11
