# Supplementary material for: Synergistic regulation by H3K36 and H3K27 methylation defines the chromatin landscape to control virulence and secondary metabolism in a fungal pathogen
Source: HighWire-hosted journal article supplement (doi:10.1101/gr.280560.125), 2025-10-14
Supplement: Supplemental_Table_S5.xlsx [file Supplemental_Table_S5.xlsx]

## Sheet: Sheet1
Supplemental Table S5. LC–MS/MS identification of H3K36-methylated peptides from methyltransferase assays in vitro
Treatment	Peptide	PTM	AScore	-10LgP	Mass	m/z	z	RT	ppm	Area Sample 2	Found By
Set2-MBP	G(+42.01)GVKK(+42.05)PHRYKPGT	Acetylation (N-term);Trimethylation	G1:Acetylation (N-term):1000.00;K5:Trimethylation:8.14	14.69	1507.86	503.626	3	2.7495	0.3	2330	DB Search
Set2-MBP	PSTGGVK			41.9	644.349	645.354	1	1.7679	-1.2	2030	DB Search
Set2-MBP	PSTGGVK(+28.03)	Dimethylation(KR)	K7:Dimethylation(KR):1000.00	39.48	672.381	673.386	1	2.0543	0.4	12500	DB Search
Set2-MBP	PSTGGVK(+28.03)K(+14.02)PHRYKPGT	Dimethylation(KR);Methylation(KR)	K7:Dimethylation(KR):12.28;K8:Methylation(KR):12.28	20.1	1750.98	876.499	2	2.3725	2.9	104000	DB Search
Set2-MBP	PSTGGVK(+28.03)KPHR	Dimethylation(KR)	K7:Dimethylation(KR):17.01	16.7	1190.69	298.679	4	2.0281	1.8	1120	DB Search
Set2-MBP	PSTGGVK(+28.03)KPHRYKPGT	Dimethylation(KR)	K7:Dimethylation(KR):9.34	30.88	1736.97	435.248	4	2.7646	-0.5	564000	DB Search
Set2-MBP	PSTGGVK(+42.05)	Trimethylation	K7:Trimethylation:1000.00	36.99	686.396	687.404	1	1.9942	3.7	68500	DB Search
Set2-MBP	PSTGGVK(+42.05)K	Trimethylation	K7:Trimethylation:9.34	20.18	814.491	408.252	2	1.723	0.3	6150	DB Search
Set2-MBP	PSTGGVK(+42.05)KP	Trimethylation	K7:Trimethylation:8.14	25.43	911.544	456.778	2	2.5081	1.2	14900	DB Search
Set2-MBP	PSTGGVK(+42.05)KPHR	Trimethylation	K7:Trimethylation:0.00	10.26	1204.7	302.183	4	2.0693	1.6	2950	DB Search
Set2-MBP	PSTGGVK(+42.05)KPHRYKPGT	Trimethylation	K7:Trimethylation:27.96	56.58	1750.98	876.499	2	2.3725	2.9	2920000	DB Search
Set2-MBP	PSTGGVKK(+42.05)PHRYKPGT	Trimethylation	K8:Trimethylation:7.65	26.94	1750.98	438.752	4	2.5685	1.2	825000	DB Search
Set2-MBP	PSTGGVKKPHRYKPGT			29.03	1708.94	570.651	3	2.2212	-0.5	157000	DB Search
Set2-MBP	STGGVK(+42.05)	Trimethylation	K6:Trimethylation:1000.00	12.39	589.343	590.349	1	1.9942	-0.4	1250	DB Search
Ash1-MBP	PSTGGVKKPHRYKPGT			11.35	1708.94	428.241	4	3.4674	1.3	33600	DB Search
Ash1-MBP	PSTGGV			15.94	516.254	517.259	1	3.6684	-2.3	30.6	DB Search
Ash1-MBP	PSTGGVK			6.05	644.349	323.181	2	1.7917	-0.5	94.1	DB Search
Ash1-MBP	PSTGGVK(+14.02)K(+28.03)PHRYKPGT	Methylation(KR);Dimethylation(KR)	K7:Methylation(KR):0.00;K8:Dimethylation(KR):0.00	12.76	1750.98	438.753	4	3.3636	1.2	496000	DB Search
Ash1-MBP	PSTGGVK(+28.03)	Dimethylation(KR)	K7:Dimethylation(KR):1000.00	35.02	672.381	337.197	2	2.0658	0	284	DB Search
Ash1-MBP	PSTGGVK(+28.03)K(+14.02)PHRYKPGT	Dimethylation(KR);Methylation(KR)	K7:Dimethylation(KR):12.28;K8:Methylation(KR):12.28	27.32	1750.98	584.668	3	3.3787	1.2	567000	DB Search
Ash1-MBP	PSTGGVK(+28.03)KPHRYKPGT	Dimethylation(KR)	K7:Dimethylation(KR):11.06	45.72	1736.97	579.996	3	3.5299	1.4	342000	DB Search
Ash1-MBP	PSTGGVK(+42.05)	Trimethylation	K7:Trimethylation:1000.00	28.93	686.396	344.204	2	2.0057	-1	989	DB Search
Ash1-MBP	PSTGGVK(+42.05)KP	Trimethylation	K7:Trimethylation:10.11	11.51	911.544	456.776	2	2.5166	-3.4	989	DB Search
Ash1-MBP	PSTGGVK(+42.05)KPHR	Trimethylation	K7:Trimethylation:0.00	13.84	1204.7	302.182	4	2.2011	-1.7	2160	DB Search
Ash1-MBP	PSTGGVK(+42.05)KPHRYKPGT	Trimethylation	K7:Trimethylation:9.34	42.49	1750.98	584.668	3	3.3787	1.2	1070000	DB Search
Ash1-MBP	PSTGGVKK(+42.05)PHRYKPGT	Trimethylation	K8:Trimethylation:0.00	29.21	1750.98	584.668	3	3.3787	1.2	567000	DB Search
