# Supplementary material for: Synergistic regulation by H3K36 and H3K27 methylation defines the chromatin landscape to control virulence and secondary metabolism in a fungal pathogen
Source: HighWire-hosted journal article supplement (doi:10.1101/gr.280560.125), 2025-10-14
Supplement: Supplemental_Table_S7.xlsx [file Supplemental_Table_S7.xlsx]

## Sheet: Sheet1
Supplemental Table S7. Genes losing Ash1-mediated H3K36me3 and gaining H3K27me3 in the F. graminearum Δash1 mutant
Gene ID	H3K27me3 log2FC (Δash1/PH-1)	P value	Genomic feature	Expression in PH-1 (FPKM)			Expression in Δash1 (FPKM)			Log₂FC(Δash1 vs WT)
				PH-1_1	PH-1_2	PH-1_3	Δash1_1	Δash1_2	Δash1_3
FGRAMPH1_01G16403	3.25	3.89e-20	Promoter;exon	4636.05	4548.4	4445.91	77.6483	82.4716	77.3174	-6.25
FGRAMPH1_01G12109	2.97	3.48e-12	Promoter	653.724	662.908	679.324	1.84661	2.56211	2.04445	-8.59
FGRAMPH1_01G18861	1.34	4.36e-05	Promoter	467.94	503.279	482.419	137.238	147.629	146.849	-2.16
FGRAMPH1_01G09453	1.3	1.09e-06	Exon	417.036	413.551	411.143	382.405	414.559	377.803	-0.46
FGRAMPH1_01G05507	1.08	3.87e-59	Promoter	363.361	383.089	351.665	0.606388	0.333138	0	-10.19
FGRAMPH1_01G12525	1.04	0.000508	Exon	326.373	323.518	297.056	81.9454	73.6196	73.0387	-2.45
FGRAMPH1_01G10967	2.93	3.52e-11	Exon	119.88	117.642	120.695	107.765	108.881	109.059	-0.14
FGRAMPH1_01G11775	3.09	1.91e-15	Promoter	106.054	112.181	105.864	2.96235	2.92943	1.93332	-5.7
FGRAMPH1_01G05163	2.97	4.25e-12	Promoter	57.8536	61.1315	57.4953	47.7483	50.7497	48.3776	-1.25
FGRAMPH1_01G27093	3.16	1.7e-17	Intron	58.5817	56.6765	58.2015	56.73	51.6746	59.2342	0.01
FGRAMPH1_01G06439	1.07	5.34e-16	Exon	56.3706	54.0767	57.776	2.87993	3.37889	2.03084	-4.68334
FGRAMPH1_01G15745	1.11	4.92e-22	Exon	47.598	45.4666	49.9144	3.55996	3.69641	3.36883	-4.1
FGRAMPH1_01G16405	3.25	3.89e-20	Promoter;exon	31.5481	29.1151	28.506	4.62364	4.04491	4.49859	-3.12
FGRAMPH1_01G18649	3.21	8.3e-19	Exon	33.6234	33.9185	35.1924	57.6938	67.2339	55.6094	0.23
FGRAMPH1_01G27091	3.16	1.7e-17	Promoter;exon	21.4084	19.2307	18.8749	17.3878	13.774	19.62	-0.12
FGRAMPH1_01G11009	3.33	1.49e-22	Exon	26.9189	24.7727	23.8045	34.6495	33.8129	31.7424	0.9
FGRAMPH1_01G21563	1.13	0.00581	Promoter	11.8931	12.9704	14.8775	6.24629	6.08148	5.61897	-1.53
FGRAMPH1_01G05161	1.38	6.08e-13	Promoter	9.23536	12.3562	11.2934	9.0491	8.60435	9.14248	-0.01
FGRAMPH1_01G13555	2.92	6.65e-11	Exon	11.9932	10.5936	10.5435	5.2443	6.70301	6.07101	-1.26
FGRAMPH1_01G21461	1.51	0.00632	Exon	11.7825	10.4577	11.7129	20.325	21.4757	21.218	0.84
FGRAMPH1_01G12741	3.04	5.54e-14	Promoter	12.7085	10.2776	10.6536	5.00802	5.08632	5.27002	-1.51
FGRAMPH1_01G15033	2.91	9.91e-11	Exon	10.1113	10.0058	11.306	6.91749	6.11518	6.02402	-1.11448
FGRAMPH1_01G05159	1.38	6.08e-13	Promoter;exon	7.95636	7.79151	7.08502	8.16616	7.43381	7.19621	-0.14
FGRAMPH1_01G10993	3.14	6.8e-17	Promoter;exon	9.23749	8.53922	8.5174	8.98083	8.7567	8.55102	-0.11
FGRAMPH1_01G18447	2.26	0.000947	Promoter;exon	7.35426	7.08279	6.89443	5.12677	4.70766	4.822	-1.6
FGRAMPH1_01G12107	2.97	3.48e-12	Promoter	5.13306	6.61678	7.63549	6.42351	6.74614	4.89546	-0.06
FGRAMPH1_01G11801	1.04	5.97e-05	Exon	4.20661	4.84361	4.15031	5.6278	7.15533	5.92667	0.49
FGRAMPH1_01G04215	2.38	0.000447	Exon	4.5019	4.1223	4.04089	4.60091	4.5549	4.58087	0.02
FGRAMPH1_01G12111	1.36	3.82e-38	Promoter;exon	3.71073	3.74442	3.66106	1.56023	1.25235	1.56209	-1.24
FGRAMPH1_01G11007	3.33	1.49e-22	Promoter	2.1927	3.67921	3.72578	0.782267	0.184184	1.0636	-2.42
FGRAMPH1_01G05483	1.97	0.0249	Exon	3.80952	3.66207	4.10933	1.84835	2.41916	1.64091	-0.97
FGRAMPH1_01G04211	2.96	6.18e-12	Promoter;exon	3.49955	3.52919	4.72477	5.38825	3.31863	5.30696	0.6
FGRAMPH1_01G21463	1.51	0.00632	Promoter;exon	3.27464	3.2445	3.83316	5.257	5.52471	5.91665	0.4
FGRAMPH1_01G15901	1.29	0.00314	Intron	1.21118	1.29803	0.995806	1.57716	0.885113	1.269	0.06
FGRAMPH1_01G09451	1.3	1.09e-06	Exon	1.00899	1.17965	2.85373	4.10363	3.55967	2.76037	0.14
FGRAMPH1_01G05405	3.14	6.5e-17	Promoter	1.22524	0.835613	0.846189	1.01999	0.833639	1.06978	0.05
FGRAMPH1_01G05409	3.07	8.68e-15	Promoter	0.933276	0.826615	1.17191	2.72417	1.86007	2.00011	0.09
FGRAMPH1_01G11805	1.04	5.97e-05	Exon	0.922008	0.790502	0.800508	1.10522	1.08736	1.48124	0.68
FGRAMPH1_01G04213	2.96	6.18e-12	Promoter;exon	0.915112	0.668684	0.451432	0.979423	1.38363	0.998749	0.12
FGRAMPH1_01G23797	2.43	4.76e-05	Intron	0.252644	0.668112	0.427307	1.50651	1.17326	0.819325	0.69
FGRAMPH1_01G12739	3.04	5.54e-14	Promoter	1.01955	0.596001	0.201182	0.218241	0.19	0.2	-1.22
FGRAMPH1_01G15899	1.26	5.22e-07	Promoter	0.374364	0.501513	0.230846	1.15194	1.34432	1.43003	0.93
FGRAMPH1_01G15597	3.26	2.34e-20	Exon	0.404887	0.493094	0.499336	0.540255	0.409337	0.706948	0.15
FGRAMPH1_01G11773	3.09	1.91e-15	Promoter	0.860069	0.322289	0.326368	0	0.350108	0	0.1
FGRAMPH1_01G05407	3.07	8.68e-15	Promoter	1.50748	0.244786	0.247884	0.268904	2.08934	1.53558	0.02
FGRAMPH1_01G18449	2.26	0.000947	Promoter	0	0.214747	0	0.0471811	0.0555437	0.128299	-0.68
FGRAMPH1_01G27053	1.96	0.00155	Promoter	0.475154	0.205749	0.677148	0.169516	0.0798245	0.276577	-0.81
FGRAMPH1_01G19113	1.17	4.84e-05	Exon	0	0.149814	0.303421	3.12693	2.67369	2.41665	3.06
FGRAMPH1_01G15589	3.11	5.34e-16	Exon	0.178099	0.0867597	0.263573	10.9604	8.75165	9.64109	4.71
FGRAMPH1_01G20955	3.64	3.31e-34	Exon	0.0842258	0.0627517	0.100207	0.686693	0.47568	0.622919	0.02
FGRAMPH1_01G11005	3.04	6.14e-14	Exon	0.0594919	0.0579621	0.234783	0.127346	0.584677	0.207774	0.8
FGRAMPH1_01G19111	1.17	4.84e-05	Promoter;exon	0.201477	0.0490741	0.0993904	0.916456	0.990043	1.09946	0.44
FGRAMPH1_01G11803	1.04	5.97e-05	Promoter;exon	0.12306	0	0.121413	0.263416	0.186063	0.644674	0.38
FGRAMPH1_01G05165	2.97	4.25e-12	Promoter	0	0	0.160172	0	0	0.141746	-0.07
FGRAMPH1_01G08779	1.01	0.0122	Promoter	0.026885	0	0.0795757	0.0575489	0.0203248	0.0469476	0.8
FGRAMPH1_01G15585	3.57	1.13e-31	Exon	0.02228	0	0	0.190767	0.0842171	0.213984	0.01
FGRAMPH1_01G18863	1.34	4.36e-05	Promoter	0	0	0	0.665984	0	0.1811	0.83
FGRAMPH1_01G06281	3.03	9.71e-14	Promoter;exon	0	0	0	0	0	0	-
FGRAMPH1_01G12737	3.04	5.54e-14	Promoter	0	0	0	0	0	0	-
FGRAMPH1_01G10995	3.14	6.8e-17	Promoter;exon	0	0	0	0	0	0	-
FGRAMPH1_01G27097	3.16	1.7e-17	Promoter	0	0	0	0	0	0	-
FGRAMPH1_01G11003	3.2	1.22e-18	Promoter	0	0	0	0	1.1764	0.849167	0.556393
FGRAMPH1_01G15587	3.58	1.13e-31	Promoter;exon	0	0	0	0.353974	0	0.0721917	-
