# Supplementary material for: Synergistic regulation by H3K36 and H3K27 methylation defines the chromatin landscape to control virulence and secondary metabolism in a fungal pathogen
Source: HighWire-hosted journal article supplement (doi:10.1101/gr.280560.125), 2025-10-14
Supplement: Supplemental_Table_S8.xlsx [file Supplemental_Table_S8.xlsx]

## Sheet: sheet1
Supplymental Table S8. Primers used in the study.
Primers	Sequence(5'>3')	Application
hph-F	GGAGGTCAACACATCAATGCCTATT	fragment of HPH
hph-R	CTCGTCCGAGGGCAAAGGAATAGAGTAG
hph-ID-F	TGTCCTGCGGGTAAATAGCT
g418-F	GGAGGTCAACACATCAATGCT	fragment of g418
g418-R	TCAGAAGAACTCGTCAAGAAGG
set1-up-F	CACAAACAAAGATACCCTGC	Δset1 mutant(HphR)
set1-up-R	AATAGGCATTGATGTGTTGACCTCCCGTGACGATGCGCTCTTCCTAC
set1-down-F	CTCGTCCGAGGGCAAAGGAATAGAGTAGTACTATTATAATACACCATT
set1-down-R	ATGGAAGATGGACAGACAGT
set1-ID-IR	TGCTTTCTGCTATCTCACCG
kmt1-up-F	AAGACAGCACAAGAGGAGAT	Δkmt1 mutant(HphR)
kmt1-up-R	CAAAATAGGCATTGATGTGTTGACCTCCTCTGGACATATTTCTTTGGTG
kmt1-down-F	CTCGTCCGAGGGCAAAGGAATAGAGTAGTGGATTTGCGAGCGACGCCC
kmt1-down-R	CGCCACATTTCAGAGCATAT
kmt1-ID-IR	TCCTTGCGTTGTGAGATGGC
Kmt6-up-F	CAGGACCAATCGAAGGACGC	Δkmt6 mutant(HphR)
Kmt6-up-R	AATAGGCATTGATGTGTTGACCTCCGGCTGCGGCTAATTGATGGC
Kmt6-down-F	CTCGTCCGAGGGCAAAGGAATAGAGTAGTTTGGGCAGAGAAGCTTGAAT
Kmt6-down-R	GAGTTCGTGAGGTGTTGAGG
Kmt6-ID-IR	CGTGAGTTTTGGTGTGATTC
kmt5-up-F	GACGACAACAACGACACGGT	Δkmt5 mutant(HphR)
kmt5-up-R	AATAGGCATTGATGTGTTGACCTCCTTTGGCAAGCCTGAGGTCTC
kmt5-down-F	CTCGTCCGAGGGCAAAGGAATAGAGTAGTATGCTAATTGGGGGGCGTTG
kmt5-down-R	TGTTGGTGTTTTGGCTGTGT
kmt5-ID-IR	AACAACAATGCTGAAGTCCT
set3-up-F	CCAATCCAGCCCAGAAGTAC	Δset3 mutant(HphR)
set3-up-R	AATAGGCATTGATGTGTTGACCTCCACTCTATAACGAAGATGATGCAG
set3-down-F	CTCGTCCGAGGGCAAAGGAATAGAGTAGTACTGCGAAGAGTTTGTATG
set3-down-R	GGTCTCTTTGGTCTGTTTGT
set3-ID-IR	AAGAAAACAAAGGGGAGAGG
set2-up-F	GGCTAAACCATCGCTGCTAT	Δset2 mutant(HphR)
set2-up-R	CAAAATAGGCATTGATGTGTTGACCTCCTTTGCTGGTGGTATACTCGTC
set2-down-F	CTCGTCCGAGGGCAAAGGAATAGAGTAGGAGACGAGCGGGATGGGGTT
set2-down-R	ATCCCTCCTCGTTTCCTTCT
set2-ID-IR	GAAGTCGTTGGGTTGTAGAT
set2-up-R-g418	CCAAAATAGCATTGATGTGTTGACCTCCTTTGCTGGTGGTATACTCGTC	Δset2/ash1 mutant-set2 fragment (G418R)
set2-down-F-g418	CTATCGCCTTCTTGACGAGTTCTTCTGAGAGACGAGCGGGATGGGGTT
ash1-up-F	CTCCTAACAACTACATCTCG	Δash1 mutant(HphR)
ash1-up-R	CAAAATAGGCATTGATGTGTTGACCTCCATTGGCAAGGTAAGAGGTCG
ash1-down-F	CTCGTCCGAGGGCAAAGGAATAGAGTAGAGTATTGAAAAGAGATGACG
ash1-down-R	ATCCACTTCTTCTCAGCCCC
ash1-ID-IR	GCTCGGTGTCCTTGGGTTCT
H3K36A-up-F	AAAAACGCACTCCAATCAGC	H3K36A mutant(HphR)
H3K36A-up-R	GTCTGCTTAGTGCGAGCCATTGTTGATGATTCTTGTGAAG
H3K36A-F1	ATGGCTCGCACTAAGCAGAC
H3K36A-R1	GTGAGGCTTCGCGACACCTCCG
H3K36A-F2	CGGAGGTGTCGCGAAGCCTCAC
H3K36A-R2	AATAGGCATTGATGTGTTGACCTCCTTAGTTGCGCTCACCACGAAG
H3K36A-down-F	CTCGTCCGAGGGCAAAGGAATAGAGTAGGCGAATGGCTTTGGGAGGAT
H3K36A-down-R	ATGCTGTATTGGATGGTGAC
H3K36A-seq-F	AACTTCATCCACATCTTCAC
H3K36A-seq-R	TTATCCTCCCAAAGCCATTC
set2-R-GFP	GCTCCTCGCCCTTGCTCACCATCGCCGGCATCTTCTGAGAGC	Δset2-C mutant(G418R)
set2-down-F-g418 adptor	CTATCGCCTTCTTGACGAGTTCTTCTGAGAGACGAGCGGGATGGGGTT
ash1-R-GFP	GCTCCTCGCCCTTGCTCACCATATCATCAGCTGCCACCATAATC	Δssh1-C mutant(G418R)
ash1-down-F-g418 adptor	CTATCGCCTTCTTGACGAGTTCTTCTGAAGTATTGAAAAGAGATGACG
GFP-F	ATGGTGAGCAAGGGCGAGGAGC	fragment of GFP
GFP-R-g418adptor	AGCATTGATGTGTTGACCTCCTTACTTGTACAGCTCGTCCATG
GFP-ID-R	CGTCGTCCTTGAAGAAGATG
leu1-up-F	GCGGAGGTTGATAAAAATAG	Δleu1 mutant(HphR)
leu1-up-R	AATAGGCATTGATGTGTTGACCTCCTTTGACAATGAGACCGCACTG
leu1-down-F	CTCGTCCGAGGGCAAAGGAATAGAGTAGTCTGGATACAACAAAATGGG
leu1-down-R	TCTCATCTCCTTCAAACCCT
leu1-ID-NR	CAGAACTCAATAACAGCACC
stf1-up-F	AGCGGTGCGGTCTCAAAAAC	Δstf1 mutant(HphR)
stf1-up-R	AATAGGCATTGATGTGTTGACCTCCAGTTGGAGGCTATTTCAGTC
stf1-down-F	CTCGTCCGAGGGCAAAGGAATAGAGTAGACAACAAAAATACACACATAGC
stf1-down-R	CCCAAGAACTACCTACAAAG
stf1-ID-NR	GTGTGCTGTTGCTTTGTATC
02354-up-F	AAGAAAACCAGACACGAATC	overexpression of CHSA(with gpda promoter, G418R)
02354-up-R-g418	CCAAAATAGCATTGATGTGTTGACCTCCGGTTAGTTTGCAAAAAGAAAG
02354-down-F-gpda	CTACCCCGCTTGAGCAGACATCACCATGCATCTTTCTGCACTCCTC
02354-down-R	GGAGGGAAGCCAAGAGAGAT
02354-ID-R	TATTGTTACTCACCGCTACC
gpda-F-g418	CTATCGCCTTCTTGACGAGTTCTTCTGATGCGGAGAGACGGACGGACG
gpda-R	GGTGATGTCTGCTCAAGCGGGGTAG
aur1-up-F	GGGGTTACTTTGTTATCTTG	Δaur1 mutant(HphR)
aur1-up-R	CCAAAATAGCATTGATGTGTTGACCTCCGTGGATATGTAGAGAGTGGTGC
aur1-down-F	CTATCGCCTTCTTGACGAGTTCTTCTGAATAGATAATAACTATACCCTAAAG
aur1-down-R	TAGGTTGCGGGCTTTTGCTC
aur1-ID-R	ATTAGATGGTGTAGGGCTGG
aur1-up-F	CCTGGGGTTACTTTGTTATC	overexpression of AUR1(with tubulin promoter,G418R)
aur1-up-R-g418	CCAAAATAGCATTGATGTGTTGACCTCCGTGGATATGTAGAGAGTGGTGC
aur1-down-R	ACTACACAGGCTCATTTACG
aur1-down-F-tubu	CATTACATCTACAGCCGTCAATATGAGTTCCACAGACCCCCTTC
tub-F-g418 adaptor	CTATCGCCTTCTTGACGAGTTCTTCTGAAGTGACCTCTCTTCGGCAGT
tub-R	ATTGACGGCTGTAGATGTAATG
ctk1-up-F	CAACTGGTCAACGAATGGTG	Δctk1mutant(G418R)
ctk1-up-R	CCAAAATAGCATTGATGTGTTGACCTCCTGCAGCTGAGCGTCGAGTTTTC
ctk1-down-F	CTATCGCCTTCTTGACGAGTTCTTCTGATGGTGGTCATTTGAACTTGAC
ctk1-down-R	ACAGCACTCTCAGGCACATT
ctk1-ID-NR	TACGAGTTTTGAGGCGATTG
aur1-P1-F	TGCGTTTGGTTTTTTCAGCT	Primers for ChIP-qPCR
aur1-P1-R	GTGGATATGTAGAGAGTGGTG
aur1-F1-F	CATGGGACGACGATCAACAT
aur1-F1-R	GCATGACATAGCAGTGGTGA
aur1-F2-F	TGTGTCACAAGACGGAAGTG
aur1-F2-R	CAAAGCGAGAAACAGCTGAC
aur1-F	CCGCAGGGTAGAGAACTACC	Primers for RT-qPCR
aur1-R	ATTCCGTTGGTCGCTTTCAG
pks12-F1	TTGCCCCTCCACTGAAAGAC	Primers for RT-qPCR
pks12-R1	AGCTGGATGGTCAGGAGAGA
pks12-P1-F	GCTTGGCATGGACCTTTGTC	Primers for ChIP-qPCR
pks12-P1-R	ATGACCCCTTGCGTATCCAG
pks12-F1-F	TTGCCCCTCCACTGAAAGAC
pks12-F1-R	AGCTGGATGGTCAGGAGAGA
pks12-F2-F	TGGGACTCTGGTCTAGTCGG
pks12-F2-R	ATTCCGCATTCCGTCCTCTC
Tri1-chip-P2-F	CAAAGTCAGTATTATTCGGTAG	Primers for ChIP-qPCR
Tri1-chip-P2-R	GTTTCATTGAGTGTTGTCTC
Tri1-chip-F1-F	CCGATAGTTAGACCTTTACAG
Tri1-chip-F1-R	GCTCCCCACTTACTCACCAC
Tri1-chip-F3-F	GGCTTCGGTTACGGAGAACA
Tri1-chip-F3-R	TCCAATCGCAGACAAGGGTC
Tri5-chip-P1-F	GCTCCGCGGGATATATGTGATG	Primers for ChIP-qPCR
Tri5-chip-P1-R	GTCCGTGGTCTGTGTTTGGAC
Tri5-chip-P2-F	GTTCCAAGAGCCGGATG
Tri5-chip-P2-R	GATGGCAAATATCTTGAC
Tri5-chip-F2-F	TAACGGCGGTGGAACAACAG
Tri5-chip-F2-R	TTCTCCATCTGAGCAACGGC
Tri4-chip-P1-F	ATGATTGACCAAGATTGGATC	Primers for ChIP-qPCR
Tri4-chip-P1-R	GCTGCCGATCAGATACAGAC
Tri4-chip-P2-F	GACGCGATAGACAAGGTACC
Tri4-chip-P2-R	CTTCTAAAGCTCAAGTCTTTG
Tri4-chip-F1-F	ATGATTGACCAAGATTGGATCAAG
Tri4-chip-F1-R	CCGTATTTATCGTGCATCTTGG
Tri4-chip-F2-F	GCCTATTGGCACTCTCCGATT
Tri4-chip-F2-R	AACTTCGCCAAGGTGTTCCT
Tri6-chip-P1-F	TGGCAAGTTATGGGGTCAGC	Primers for ChIP-qPCR
Tri6-chip-P1-R	TGTTGCTTCCGCACATCAGT
Tri6-chip-P2-F	GCCGACGCGTCTCGGATAAG
Tri6-chip-P2-R	TTCGAGGGTAGTCAAAATAG
Tri6-chip-F1-F	ATGATTTACATGGAGGCCG
Tri6-chip-F1-R	GGTTCTTCGGAGTACAAAGTC
Tri6-chip-F2-F	CACTTCAAGCGCTTTTTCTG
Tri6-chip-F2-R	TCAACACTTATGTATCCGCC
Actin-RT-F	TGTCCTTGGTCTTGAGAGCG	Primers for RT-qPCR
Actin-RT-R	GAAGAAGGAGCAAGAGCAG
PKS10-F	CTACCACAGAGCAAGGGACA	Primers for RT-Qpcr (Fg08208)
PKS10-R	ATGCCGTGGTAGAGGATAGC
PKS23-F	GGATTCCTATCCCTCCGTGA	Primers for RT-qPCR (Fg25691)
PKS23-R	TAGAGTCGTGCTAGTGGGAG
NRPS16-F	CACACCCGACCAACAGAAAT	Primers for RT-qPCR (Fg04087)
NRPS16-R	GCAAGAGGGTTTTGTCCGTA
NRPS14-F2	AACTGGCTACACAAGGAGCG	Primers for RT-qPCR (Fg21959)
NRPS14-R2	TCAAACAGACTCCGAACAGG
NRPS8-F	GTTCCTTCACTGCTAGAGCC	Primers for RT-qPCR (Fg09373)
NRPS8-R	TGACTTGCTCAAAGTGTCCC
P450a-F	CTTTCTCCAGTTAGCCGCAT	Primers for RT-qPCR (Fg07804)
P450a-R	TGTCTGAAGTTGCCATAGAT
P450b-F	TTGATAGAGGTAGTGCGAGC	Primers for RT-qPCR (Fg10629)
P450b-R	TCCACAACTCAACAAGGCGT
P450c-F	TTGGTATGCTGCTCCAGGTT	Primers for RT-qPCR(Fg02113)
P450c-R	ATGATGCGCCCTTTGTCTTG
