# Supplementary material for: Synergistic regulation by H3K36 and H3K27 methylation defines the chromatin landscape to control virulence and secondary metabolism in a fungal pathogen
Source: HighWire-hosted journal article supplement (doi:10.1101/gr.280560.125), 2025-10-14
Supplement: Supplemental_Table_S9.xlsx [file Supplemental_Table_S9.xlsx]

## Sheet: Sheet1
Supplemental Table S9. Summary of insertion and deletion (indel) variants in Δset2, Δash1, Δset2-C, Δash1-C, and H3K36A mutants.
Mutant	Indel type	Chromosome	Start position	End position	Genomic region	Gene ID	Inserted fragment name
H3K36A	Insertion	HG970333	7516023	7516662	3' UTR	FGRAMPH1 01G14931	HPH
Δash1	Insertion	HG970333	3120043	3122937	CDS	FGRAMPH1 01G11173	HPH
Δset2	Insertion	HG970334	2681092	2681325	CDS	FGRAMPH1 01G18203	HPH
Δset2/ash1	Insertion	HG970333	3120010	3123078	CDS	FGRAMPH1 01G11173	HPH
Δset2/ash1	Insertion	HG970334	2681028	2682463	CDS	FGRAMPH1 01G18203	NEO
Δset2-C	Insertion	HG970334	2685107	2686217	3' UTR	FGRAMPH1 01G18203	NEO
Δash1-C	Insertion	HG970333	3118569	3119247	intergenic region	-	NEO
Δset2-C	Insertion	HG970334	2684289	2685023	3' UTR	FGRAMPH1 01G18203	GFP
Δash1-C	Insertion	HG970333	3119536	3120604	3' UTR	FGRAMPH1 01G11173	GFP
Δset2/ash1	Deletion	HG970333	3120328	3122791	CDS	FGRAMPH1 01G11173	None
Δset2/ash1	Deletion	HG970334	2681441	2684281	CDS	FGRAMPH1 01G18203	None
Δash1	Deletion	HG970333	3120328	3122791	CDS	FGRAMPH1 01G11173	None
Δset2	Deletion	HG970334	2681441	2684281	CDS	FGRAMPH1 01G18203	None
